# Supplementary material
Source: publisher figshare collection journal article supplement (https://springernature.figshare.com/ndownloader/files/13564304)
Supplement: Supplementary file 1 [file 13564304]

mnemonic	year	X1_1_6_6_1	X1_1_7_6_1	X1_1_7_4_1	X1_1_9_3_1	X1_1_6_5_1	X1_1_7_2_1	X1_1_7_3_1	X2_2_1_1_1	X1_1_8_4_1	X1_1_4_6_1	X1_1_5_2_1	X1_2_1_1_1	X1_1_7_1_1	X1_2_2_2_1	X1_1_8_3_1	X1_1_8_5_1	X1_1_4_5_1	X1_1_9_1_1	X1_2_2_1_1	X1_1_1_2_2	X1_1_1_5_1	X1_1_4_2_1	X1_1_1_2_1	X1_1_7_7_1	X1_1_3_4_1	X1_1_2_5_1	X1_1_3_2_1	X1_1_2_1_1	X1_1_9_2_1	X1_1_2_6_1	X1_1_8_6_1	X1_1_6_3_1	X1_2_1_2_1	X1_1_2_4_1	X1_1_7_8_1	X1_1_6_2_1	X2_1_2_1_1	X1_1_2_5_2	X1_1_4_7_1	X1_1_4_3_1	X1_1_2_2_1	X1_1_8_1_1	X1_1_3_1_1	X2_1_1_1_1	X1_1_1_4_2	X1_1_6_1_1	X1_1_6_8_1	X1_2_2_3_1
E06000001	2009	0.404067158	0.519191861	0.528876584	0.406628333	0.147195352	0.174246986	0.524621695	1.797912196	0.266164173	0.393023784	0.214343737	0.262406023	0.303424723	0.735101009	0.681337222	0.219931218	0.754837096	0.504163259	0.083328148	0.79996395	0.85921272	0.846974983	1.140195831	0.380402231	0.433066022	0.334489334	0.117486866	0.744857059	0.065229624	2.024327286	0.038834723	0.225043484	0.189670782	0.821874317	0.591038584	0.19296617	1.307111145	0.447246646	0.259991795	0.097841482	0.290044313	0.10787968	0.282432034	0.544513588	0.312996673	0.181666456	0.211145308	0.435074177
E06000002	2009	0.376378786	0.488086501	0.504530938	0.37110366	0.141029823	0.162208341	0.505512762	1.710024155	0.251979866	0.371892814	0.199667689	0.239670624	0.291624877	0.716038068	0.640318641	0.210179531	0.699685499	0.473937777	0.082736138	0.757408396	0.823825998	0.781116593	1.076644888	0.35512669	0.402677499	0.304794405	0.115042111	0.682132943	0.066019721	1.859504964	0.036597113	0.214832278	0.179368077	0.78950766	0.559779994	0.188392065	1.140537015	0.403016736	0.251640085	0.099827371	0.265277676	0.101850939	0.276767614	0.513975383	0.292295369	0.176269648	0.201833445	0.4158345
E06000003	2009	0.414968356	0.52783285	0.545467691	0.409001269	0.150430629	0.1831141	0.541673528	1.787087044	0.269794328	0.405112871	0.223516065	0.270622134	0.310085811	0.739595957	0.69412096	0.222756409	0.772240325	0.510914029	0.085329553	0.826404516	0.877665353	0.878430301	1.173858237	0.396078104	0.446345199	0.336403933	0.117695458	0.766301368	0.065425688	2.080388906	0.03920981	0.231464534	0.198706318	0.839246637	0.604228635	0.200087216	1.316595225	0.463186398	0.269293185	0.090317118	0.296797712	0.112440994	0.297156031	0.581470862	0.314494003	0.189898799	0.219325537	0.437899486
E06000004	2009	0.410233463	0.528417396	0.53482565	0.40611644	0.149484394	0.172041337	0.538538294	1.739979622	0.262382814	0.396910505	0.21074538	0.258530408	0.312466275	0.730557802	0.681890001	0.217645871	0.756965842	0.514690645	0.086532843	0.79758541	0.867849118	0.831402958	1.128773795	0.374210102	0.429967861	0.3324219	0.121834388	0.742891515	0.067862633	1.998392754	0.03946902	0.230437815	0.18791018	0.836126542	0.586165549	0.194838342	1.356929993	0.439624364	0.260672175	0.104834691	0.281847937	0.104334579	0.291013003	0.554637063	0.313730483	0.18476118	0.216302754	0.444269751
E06000005	2009	0.414901147	0.527581117	0.539858934	0.40694402	0.153056855	0.176095098	0.544611862	1.717397748	0.260981564	0.398070017	0.21141159	0.264754464	0.318946303	0.722024602	0.682147871	0.219371308	0.758491963	0.511637064	0.086758404	0.80443797	0.864446085	0.84617633	1.134709068	0.381150864	0.435202331	0.330946023	0.121753485	0.747377255	0.066859048	2.009961799	0.03812231	0.231121715	0.192504241	0.840303738	0.579061921	0.196860823	1.381289859	0.44735188	0.261366858	0.092820051	0.283337437	0.105034843	0.291408722	0.553926904	0.312799421	0.187192406	0.220073764	0.442310104
E06000006	2009	0.404727917	0.524983576	0.529464029	0.40652174	0.146706617	0.171650493	0.53046486	1.778931605	0.262307713	0.394407362	0.211137955	0.260350774	0.308600357	0.733060315	0.678650984	0.217624747	0.756667232	0.511429384	0.085464797	0.795599005	0.862881211	0.834844019	1.132066995	0.376506407	0.427647729	0.331867708	0.117494211	0.741973418	0.065815918	2.002772817	0.038979374	0.2274237	0.187048182	0.829100971	0.587753385	0.191708305	1.330617946	0.442173992	0.258478952	0.099097667	0.282516878	0.104966956	0.281038901	0.5473565	0.315193532	0.181511062	0.212396703	0.437647418
E06000007	2009	0.423751999	0.543277722	0.54715895	0.407967001	0.155801525	0.173970032	0.558497085	1.665619572	0.259504778	0.399623827	0.209639203	0.263174514	0.327674517	0.723135219	0.68669221	0.217473707	0.764740271	0.525062152	0.0910311	0.800425068	0.875202154	0.833781315	1.128080146	0.372616011	0.43348524	0.333824845	0.126800453	0.746439247	0.070636187	1.995812463	0.039617271	0.235081863	0.191275261	0.856476402	0.579947115	0.197273685	1.46624553	0.440619492	0.262619942	0.094479597	0.281067614	0.101791496	0.298351198	0.565947024	0.317493829	0.190476489	0.225268018	0.453357154
E06000008	2009	0.353322837	0.455422155	0.491490061	0.333673639	0.146415691	0.152159853	0.502507377	1.461022348	0.232865805	0.348834754	0.185419363	0.206600213	0.294059573	0.693185209	0.578146809	0.197425505	0.61488253	0.426308923	0.089132475	0.694483514	0.79535876	0.690415124	0.989817847	0.31977919	0.358676126	0.266467242	0.116987918	0.606042871	0.079892584	1.604077248	0.034681084	0.21065667	0.164456974	0.797351257	0.512708136	0.193456971	0.999465832	0.337613185	0.246098689	0.115075598	0.241406001	0.095712987	0.305300167	0.469830143	0.252855133	0.180651691	0.203735599	0.400585835
E06000009	2009	0.407270536	0.517915052	0.536463064	0.397816516	0.148033421	0.178160837	0.533520835	1.845615077	0.264499667	0.397801927	0.215996137	0.265025413	0.307841847	0.733384834	0.679727597	0.222389735	0.757334219	0.499426649	0.085807386	0.813078714	0.864202674	0.860271283	1.157074375	0.389846068	0.439931921	0.326270075	0.118166751	0.741746583	0.064878852	2.043467234	0.038021661	0.229327898	0.195469795	0.826663144	0.588772259	0.198792139	1.279018622	0.454013272	0.265153537	0.090754309	0.28535922	0.110823127	0.291271813	0.56609583	0.309008993	0.184840308	0.214750948	0.431514837
E06000010	2009	0.364167524	0.481559811	0.493450795	0.370474018	0.134963408	0.156505207	0.488929189	1.792291596	0.247614176	0.36379241	0.194340102	0.236864473	0.285654004	0.71173492	0.629766317	0.206477016	0.695541437	0.472915559	0.08073127	0.739016848	0.804187045	0.765002314	1.063133179	0.348078407	0.395515016	0.304656305	0.111702146	0.671859576	0.062461125	1.8450356	0.035311922	0.209416697	0.174611739	0.771893311	0.556762825	0.18047462	1.141881994	0.399847631	0.244350583	0.100212966	0.260670525	0.099947876	0.257690524	0.496128158	0.294722528	0.168991731	0.195837717	0.4103481
E06000011	2009	0.451132786	0.554404847	0.575847166	0.418006141	0.164261722	0.192192506	0.580195508	1.657976077	0.269064834	0.41417942	0.2268998	0.288039064	0.335461677	0.718054154	0.713818409	0.226234318	0.798722612	0.530567708	0.089510648	0.845094697	0.89176285	0.897879786	1.181072591	0.404886376	0.462520763	0.347630326	0.131873578	0.805069269	0.070837721	2.107148259	0.0400478	0.243212993	0.208488579	0.876842486	0.590798114	0.207735177	1.565915294	0.484711673	0.277103482	0.084897398	0.304421033	0.111800177	0.325747141	0.616858658	0.314793321	0.201410791	0.239523001	0.457002334
E06000012	2009	0.40013384	0.514106895	0.525614773	0.400763526	0.145487982	0.17193609	0.526381849	1.753612515	0.257806557	0.386242104	0.211338822	0.258525236	0.304047409	0.7161461	0.667307896	0.213714186	0.743789198	0.501932892	0.084686591	0.788578798	0.847319264	0.830575507	1.124387734	0.374541738	0.427412793	0.324525027	0.117830121	0.731663639	0.065393774	1.986588086	0.037402888	0.224268151	0.189428892	0.813833478	0.579361117	0.19222273	1.306370994	0.437400854	0.257026717	0.096146892	0.278543497	0.105186841	0.285654534	0.561025129	0.307981303	0.181810148	0.210508567	0.428354929
E06000013	2009	0.416283116	0.528981664	0.542791091	0.402049871	0.151771674	0.176789327	0.542802019	1.690331318	0.259814694	0.394228672	0.214208992	0.265929307	0.314804541	0.719157309	0.679801825	0.216613767	0.757040189	0.512629998	0.086750958	0.804375597	0.858862327	0.84040503	1.134138269	0.381978939	0.435795657	0.331128836	0.122997507	0.755388446	0.06745034	2.010938513	0.038447471	0.230845352	0.19410972	0.837070033	0.57995329	0.197161721	1.402382153	0.45110908	0.263478092	0.09837825	0.2845984	0.105830071	0.296412657	0.574885923	0.306583372	0.187452462	0.220978938	0.43940946
E06000014	2009	0.409078995	0.5238998	0.53152282	0.397980199	0.148899758	0.169884449	0.539545531	1.675008994	0.252270822	0.386530967	0.205968003	0.255577436	0.3145454	0.70045523	0.672146829	0.21249714	0.745710185	0.509819008	0.086314011	0.777874242	0.846311565	0.814109993	1.104411443	0.363559171	0.426571229	0.323207467	0.121969865	0.72739799	0.067716408	1.958224477	0.037750401	0.229636734	0.188135713	0.822077056	0.562278343	0.192513833	1.377075253	0.434085295	0.255719072	0.089318632	0.272113493	0.101616683	0.291150143	0.556060109	0.309205343	0.184876619	0.218378127	0.439434331
E06000015	2009	0.386326922	0.494768511	0.517380798	0.36421327	0.152397003	0.161474546	0.531075276	1.560670482	0.244226353	0.369113414	0.19466913	0.229653011	0.309916723	0.702316946	0.629218602	0.204289168	0.680677496	0.472156596	0.091677288	0.738089358	0.828178913	0.749136907	1.049179021	0.338323905	0.393469926	0.294560067	0.122790689	0.664475391	0.076687181	1.769737571	0.036896586	0.222948542	0.177741482	0.820004192	0.53888857	0.196014331	1.192173807	0.380415634	0.253799975	0.108179377	0.256503071	0.097940127	0.30346247	0.523886955	0.283573751	0.186499952	0.216037052	0.422651594
E06000016	2009	0.335615755	0.435054578	0.488541449	0.288595285	0.156609689	0.143553521	0.520488899	1.364780761	0.222076033	0.323757484	0.167694918	0.178959717	0.299717524	0.683506794	0.53704156	0.185981347	0.543712682	0.386218641	0.099047191	0.644914317	0.758378741	0.601353916	0.911739234	0.285250318	0.323760876	0.231445519	0.124939175	0.52255516	0.100731243	1.352764671	0.032786113	0.210235241	0.156371403	0.808251181	0.465219858	0.200533874	0.778584072	0.275341891	0.246995018	0.115063246	0.217508042	0.089850091	0.334925629	0.438027425	0.221337838	0.186506345	0.208691076	0.376104592
E06000017	2009	0.470141962	0.578587058	0.595846255	0.448456266	0.174556874	0.199663118	0.61075569	1.676313771	0.270179362	0.429774646	0.232636582	0.295918802	0.356174298	0.717073948	0.733174529	0.229552062	0.824079814	0.542588383	0.092876832	0.860716559	0.915812194	0.909454017	1.196352398	0.4108113	0.475408818	0.356182739	0.134757691	0.818376594	0.075023097	2.142503082	0.041115426	0.25161863	0.214274946	0.911123611	0.583698339	0.215381257	1.683084324	0.492773707	0.283891094	0.090017444	0.309593531	0.113004919	0.342731642	0.647458964	0.317987411	0.209366141	0.250313009	0.475541682
E06000018	2009	0.33306166	0.447324999	0.469696265	0.336275984	0.132142984	0.142707565	0.477730533	1.641973827	0.2288215	0.335859902	0.180349539	0.203059805	0.282098856	0.691404881	0.566996306	0.19036281	0.614253411	0.430841996	0.082027719	0.668493621	0.763025941	0.674896734	0.979152067	0.310179109	0.356528066	0.265848352	0.111355693	0.589532252	0.068772856	1.620046187	0.033533066	0.199537565	0.158951604	0.75826513	0.501934203	0.181397199	0.96770437	0.339243933	0.237286826	0.101645861	0.229357448	0.093146936	0.270966433	0.457522836	0.263916883	0.165921679	0.186334957	0.397400979
E06000019	2009	0.455124314	0.559823874	0.584976569	0.42194051	0.16762534	0.197137405	0.587867163	1.778819891	0.2735699	0.428403225	0.230017791	0.292816617	0.344395662	0.738492261	0.728947138	0.236988489	0.816535006	0.531701732	0.089693932	0.867600706	0.909237375	0.923878819	1.211105258	0.415746437	0.471423891	0.349574869	0.133288183	0.811140666	0.070555385	2.150015566	0.040680985	0.248331078	0.211891831	0.887869311	0.602801241	0.211512316	1.532962437	0.492163939	0.280827953	0.086910094	0.310683112	0.114542437	0.326402199	0.618186157	0.323931833	0.204230453	0.239889705	0.462864754
E06000020	2009	0.40684173	0.527643866	0.538609561	0.39918535	0.148421851	0.172256323	0.53955569	1.777136923	0.264001326	0.399646518	0.209999005	0.257495498	0.31409622	0.746996318	0.680682566	0.221965482	0.754713334	0.512958224	0.088444514	0.801317633	0.872452697	0.831426463	1.135222313	0.375621826	0.426420039	0.329133965	0.123293895	0.737245425	0.068285943	1.986720123	0.039458668	0.230122434	0.187531409	0.839282815	0.593885057	0.195573333	1.325345929	0.433508471	0.261449049	0.104752729	0.282023543	0.10487463	0.29133926	0.54884447	0.316714187	0.185411671	0.216894557	0.443951322
E06000021	2009	0.388715083	0.506317176	0.524217874	0.386033123	0.147301959	0.167542595	0.527289699	1.772880292	0.255153564	0.384081594	0.205839629	0.245250512	0.306243623	0.733050586	0.650311654	0.21422414	0.714887001	0.484088582	0.087682062	0.770642646	0.849754815	0.798490451	1.106708371	0.36478619	0.413399307	0.31084912	0.118684939	0.701004688	0.070686148	1.909825963	0.037193846	0.223783009	0.184040642	0.822482704	0.570491909	0.196841705	1.202401029	0.415578068	0.259572909	0.105311034	0.271446274	0.104611902	0.29474357	0.536777011	0.295345471	0.182751936	0.211718833	0.427164623
E06000022	2009	0.427798546	0.53739172	0.552279725	0.398546371	0.158635864	0.179708085	0.563209563	1.658531831	0.257692684	0.398922809	0.211900562	0.267628887	0.331302845	0.709991232	0.687932445	0.219520616	0.766476365	0.515443171	0.088882241	0.80369819	0.866203978	0.839960518	1.129572088	0.375997459	0.441019374	0.331201049	0.127764412	0.746934467	0.07032382	1.98757368	0.038712143	0.237753445	0.195873912	0.853995036	0.56643036	0.199831759	1.44430422	0.448608177	0.265843288	0.084021493	0.282308493	0.104553135	0.307685383	0.579284923	0.313048117	0.194270191	0.228570504	0.449768598
E06000023	2009	0.384422029	0.506101007	0.512555626	0.37821748	0.144447025	0.155672464	0.525701271	1.661358176	0.23633236	0.367298381	0.187780646	0.231009458	0.318923295	0.699535106	0.632873064	0.202606962	0.701567932	0.499297039	0.087402313	0.725830099	0.819241513	0.741739784	1.048625356	0.333957996	0.395794202	0.301286641	0.121109885	0.669226109	0.06853985	1.805298402	0.035521774	0.221618436	0.172686301	0.807015004	0.532472033	0.185639413	1.282991732	0.389005908	0.244799658	0.099100347	0.245881823	0.092848359	0.273367413	0.499499035	0.303056929	0.177281366	0.207502372	0.438467356
E06000024	2009	0.458007216	0.565885838	0.579681348	0.42910198	0.16845103	0.190989545	0.593115498	1.65160087	0.26709993	0.420429755	0.224811274	0.285848036	0.346098581	0.718622685	0.713550308	0.224371925	0.804907207	0.536280564	0.093210138	0.84200256	0.898845849	0.888380431	1.177479801	0.399065869	0.463543112	0.346909472	0.132815977	0.796968034	0.073114932	2.098029603	0.040344426	0.247264669	0.207911297	0.888077785	0.585653217	0.209772255	1.599255241	0.476246162	0.277945081	0.092192152	0.298785095	0.109488004	0.327255283	0.615713239	0.318093093	0.20415559	0.243907122	0.466902361
E06000025	2009	0.429751579	0.546238115	0.554706059	0.408912218	0.156105145	0.176648456	0.565342769	1.647349664	0.260740497	0.404501734	0.210885942	0.265391793	0.331095966	0.726189251	0.695732712	0.21973661	0.771147753	0.532533487	0.092706275	0.81393428	0.882252094	0.843640594	1.138676171	0.377119081	0.440101081	0.334594772	0.129874994	0.756167538	0.070068539	2.01693541	0.040067889	0.239220384	0.194665504	0.86154802	0.583641822	0.199788913	1.490712763	0.44714994	0.265103024	0.096205796	0.283725163	0.101971888	0.302293423	0.580138794	0.320178799	0.193507453	0.228743952	0.45769117
E06000026	2009	0.405792655	0.525197173	0.532613661	0.398508963	0.148191105	0.170916569	0.537115859	1.788344	0.25667093	0.390896783	0.20829967	0.256158148	0.314401767	0.725124387	0.673561745	0.217098728	0.750989209	0.511487066	0.086218954	0.788348359	0.858292946	0.822457342	1.125111581	0.371926967	0.429173638	0.324642345	0.121888403	0.728760467	0.067533941	1.981129664	0.037751968	0.230028681	0.188805939	0.829479357	0.578292221	0.193772571	1.347137571	0.437017062	0.257803602	0.096384024	0.2735928	0.102978881	0.288779363	0.554993291	0.315388961	0.183656202	0.215237831	0.438763712
E06000027	2009	0.444843548	0.54659944	0.57645512	0.420667279	0.163965949	0.197156045	0.573594084	1.816971739	0.275865659	0.422350177	0.234604632	0.290489169	0.33046743	0.740123253	0.716785913	0.233755858	0.803108087	0.518987533	0.087422801	0.864523435	0.903169516	0.92403058	1.215998556	0.419922022	0.472192492	0.346198828	0.128471459	0.806553601	0.069283913	2.158674967	0.039944208	0.244914526	0.213674067	0.875277626	0.604280991	0.213409346	1.413644113	0.492675876	0.282899212	0.090329469	0.311076857	0.118782696	0.323085934	0.62338543	0.316488202	0.201817387	0.234175747	0.450361495
E06000028	2009	0.406093625	0.51689727	0.530964048	0.38831943	0.152859643	0.170095493	0.539830955	1.720233915	0.251568709	0.383485312	0.204114186	0.255264961	0.321420198	0.700181792	0.662002123	0.215648619	0.741065269	0.49943862	0.085565758	0.767122297	0.840288561	0.810439017	1.102687901	0.361770762	0.423931441	0.316227031	0.125267881	0.707106263	0.069249184	1.921379435	0.036994758	0.228240178	0.188879679	0.823324196	0.551825178	0.193434721	1.332741918	0.428387933	0.256588874	0.088584186	0.270492547	0.102274737	0.293765219	0.549578945	0.309447614	0.185543503	0.2176547	0.437395525
E06000029	2009	0.439706224	0.548426279	0.569017372	0.422828821	0.160765003	0.18677114	0.575229491	1.723541842	0.268622018	0.415122342	0.223613521	0.278109264	0.333030297	0.729310454	0.708674106	0.225738422	0.790588311	0.526788953	0.091657534	0.837753146	0.895437522	0.885684418	1.180616441	0.39683725	0.459674884	0.34150327	0.130031292	0.778232394	0.070525721	2.089263616	0.039320447	0.242465592	0.205567837	0.868132823	0.593268348	0.208733879	1.462936053	0.467226717	0.275343432	0.095710204	0.296466009	0.110642266	0.320628793	0.603351685	0.318613122	0.198634115	0.23463435	0.457466277
E06000030	2009	0.408490967	0.534083807	0.538673038	0.400921509	0.151276717	0.164876648	0.549226045	1.67065148	0.253056198	0.388369005	0.200191553	0.248734711	0.324619415	0.730093297	0.665203319	0.209479944	0.738999526	0.522185028	0.094377858	0.7753482	0.865053591	0.795196227	1.104715829	0.356228079	0.418135874	0.322891251	0.125826243	0.723301489	0.071209466	1.928445892	0.038183102	0.230649741	0.183876672	0.84593843	0.570403226	0.195125555	1.407544304	0.416823908	0.258822725	0.104475139	0.268087911	0.097928743	0.292936867	0.540844381	0.313549265	0.186269232	0.22097748	0.451842712
E06000031	2009	0.392596253	0.508783415	0.527666332	0.378116634	0.152538318	0.163177841	0.53840318	1.627233443	0.250606682	0.380853489	0.196066084	0.235801986	0.317788002	0.725237914	0.641730266	0.211267975	0.700396896	0.487210735	0.091986191	0.758549315	0.846643364	0.764990666	1.074187977	0.347112804	0.400898346	0.304080145	0.123785464	0.682608213	0.074795203	1.8207894	0.037631249	0.22527829	0.179145502	0.832379503	0.556662213	0.197746732	1.212840125	0.389078723	0.258851411	0.114344718	0.261821042	0.098668439	0.299545649	0.514813944	0.29213636	0.186803569	0.21735584	0.435322912
E06000032	2009	0.351054808	0.444567858	0.502234128	0.299059198	0.162795298	0.150044683	0.532106768	1.296340424	0.219989258	0.331673968	0.168489893	0.181922582	0.317623042	0.688474557	0.537408934	0.186321314	0.552976877	0.401464132	0.099880255	0.645399014	0.768874139	0.611677965	0.925247689	0.289846837	0.330684323	0.235443967	0.125133789	0.552941125	0.098528089	1.374045479	0.034384301	0.215710772	0.156990236	0.827477502	0.47119832	0.201762572	0.853730875	0.281427268	0.2499642	0.122137568	0.226395774	0.089171703	0.339406563	0.435616406	0.222547666	0.193503224	0.222832278	0.397495611
E06000033	2009	0.438880341	0.552485843	0.566260496	0.41753321	0.164478071	0.182315704	0.579004406	1.72614678	0.264446873	0.412838547	0.217159606	0.270648305	0.341819658	0.734732087	0.703921269	0.224634269	0.783619042	0.52734215	0.092458951	0.818767244	0.894755025	0.858853761	1.15894012	0.385487643	0.44778035	0.339684774	0.130438323	0.761397258	0.074337236	2.028095683	0.039523414	0.242510113	0.198615414	0.881061771	0.585220201	0.206255434	1.474843307	0.449931012	0.272030528	0.104903267	0.288374314	0.10758958	0.315068182	0.571853457	0.320774431	0.19768585	0.234878642	0.46994232
E06000034	2009	0.407866303	0.53118504	0.538555778	0.403316878	0.153437949	0.166707759	0.548167139	1.666951837	0.255389998	0.395489178	0.202319649	0.246133345	0.32659127	0.74628132	0.666063518	0.215864533	0.738915558	0.518629249	0.091879793	0.779802571	0.873056229	0.797063885	1.109197093	0.360825493	0.417003566	0.324195353	0.125205844	0.720006313	0.07220957	1.919347674	0.039536474	0.232035219	0.180214874	0.855563424	0.576442857	0.197300113	1.374941821	0.41400117	0.258002922	0.121082866	0.269679075	0.099171921	0.292428733	0.524926224	0.312161721	0.187420336	0.217643286	0.462356995
E06000035	2009	0.417788612	0.540808013	0.544609274	0.412509781	0.154693776	0.1717286	0.552454192	1.773857824	0.261998098	0.399782189	0.209408397	0.257150697	0.326542276	0.747178405	0.687403827	0.21962233	0.761775891	0.523788899	0.090297056	0.796308494	0.878406073	0.823515739	1.13456002	0.371656063	0.430499815	0.33422539	0.127207381	0.745824265	0.070956677	1.984648214	0.039342371	0.233709754	0.187255835	0.855551147	0.587162111	0.197901644	1.417363036	0.433763472	0.263337393	0.110165886	0.279873282	0.102946369	0.296034111	0.547660364	0.31810008	0.188127231	0.222111875	0.458874089
E06000036	2009	0.44969867	0.574613607	0.575854018	0.417265593	0.168813496	0.177217347	0.597179263	1.629681133	0.261214162	0.41517035	0.208256933	0.265852196	0.359317786	0.745003749	0.706683737	0.221446037	0.792836192	0.556559035	0.099068305	0.811898065	0.908902823	0.829746492	1.144086236	0.369258082	0.441991014	0.344377766	0.13827572	0.764034373	0.078352413	1.99533341	0.04092567	0.248870494	0.194229523	0.90936569	0.590414723	0.203962673	1.599247587	0.435480729	0.27026259	0.110414404	0.278525735	0.100704722	0.313526757	0.556157057	0.332530293	0.202228147	0.24621108	0.490471897
E06000037	2009	0.47038422	0.591625414	0.594572764	0.437649313	0.172310015	0.187201589	0.615678048	1.67416448	0.266980492	0.429746087	0.217438861	0.283194034	0.365310262	0.738942375	0.731732226	0.226429753	0.824934729	0.564010355	0.098897783	0.84402563	0.924387183	0.877726227	1.175291467	0.389378851	0.462931151	0.355378733	0.140905686	0.792816853	0.078148449	2.08922638	0.041090704	0.253453645	0.203766609	0.916889219	0.595020528	0.209143939	1.75087875	0.467354547	0.276595976	0.099778295	0.290080488	0.104677585	0.326121359	0.596286932	0.335067318	0.205475156	0.252965788	0.498550041
E06000038	2009	0.400603404	0.519873915	0.532133505	0.372965046	0.160644957	0.156607278	0.563545003	1.571901602	0.239124759	0.372259585	0.18342883	0.220292507	0.341347389	0.724181211	0.625420553	0.197757919	0.681028986	0.499819013	0.097420684	0.716695504	0.835613295	0.707444356	1.034827612	0.319804929	0.386094769	0.293666716	0.128840812	0.659583774	0.082673594	1.716733911	0.03736676	0.228987224	0.171501837	0.854875341	0.523896725	0.197839541	1.28796265	0.358824749	0.255636154	0.121906486	0.241776069	0.09125391	0.308849239	0.509609966	0.292490093	0.191440219	0.226006054	0.452056418
E06000039	2009	0.370901072	0.46585852	0.511874653	0.307067697	0.173883791	0.147485744	0.556086425	1.287215424	0.221080892	0.341234644	0.162225679	0.179390829	0.335473757	0.706838436	0.549304207	0.185295683	0.561451261	0.424080237	0.105106248	0.649757676	0.790098247	0.597146572	0.932489643	0.279490022	0.333343474	0.244757966	0.132909212	0.564824468	0.102385487	1.379182412	0.036664773	0.22274998	0.153593465	0.838640007	0.474753625	0.203230744	0.920993574	0.276916402	0.255049178	0.135021976	0.222815638	0.085216181	0.333159466	0.430814866	0.235432532	0.198926536	0.224945687	0.412745756
E06000040	2009	0.476212005	0.58287022	0.598356308	0.420398825	0.182019922	0.188554695	0.624929448	1.566107322	0.266962352	0.421377729	0.212200925	0.275674184	0.373531495	0.724959034	0.717671278	0.22241259	0.8037402	0.549920072	0.100562778	0.826659164	0.910968868	0.85372672	1.149879315	0.378988826	0.460483866	0.348448815	0.139185754	0.770039431	0.083917228	1.998062036	0.040875315	0.253878983	0.2063956	0.921562955	0.569891939	0.211868507	1.720049589	0.444966451	0.281082308	0.098316645	0.284493417	0.103372766	0.343465662	0.59184536	0.319674392	0.211650558	0.263306372	0.500116076
E06000041	2009	0.472211506	0.58175992	0.59674851	0.415592932	0.180471118	0.187417727	0.625557683	1.544638369	0.265940272	0.424503353	0.212801361	0.274596427	0.372181835	0.736945825	0.712397735	0.224193973	0.800125068	0.551205148	0.101548512	0.829744509	0.917769767	0.84572376	1.15006102	0.377184926	0.449512988	0.34703948	0.142190942	0.773367004	0.082462309	1.996988088	0.041956264	0.254514061	0.20242186	0.928027244	0.57758812	0.212074999	1.676451427	0.441910436	0.282207636	0.101233083	0.286626216	0.103317347	0.338110359	0.590989931	0.322125454	0.21438333	0.260848861	0.498732521
E06000042	2009	0.412236714	0.536764509	0.546417411	0.392997366	0.15990805	0.16450851	0.567088165	1.566222025	0.248123623	0.387552745	0.195113309	0.237842251	0.342359334	0.740688183	0.648572299	0.207155019	0.720449578	0.515683369	0.099037848	0.758411369	0.872639578	0.761409936	1.084493684	0.345037502	0.402832416	0.311985389	0.128034985	0.705641012	0.079417365	1.831925895	0.039143867	0.234221156	0.179060357	0.873851564	0.559108643	0.200941572	1.373313445	0.38913824	0.262577889	0.120435364	0.261356264	0.096674631	0.308078227	0.51871105	0.303561963	0.196300628	0.229815946	0.464879983
E06000043	2009	0.413105706	0.546604571	0.546733485	0.395731923	0.157676963	0.165776768	0.566821828	1.819727607	0.251696482	0.389874041	0.197647199	0.252125519	0.347022087	0.732366214	0.679303175	0.215893272	0.754432194	0.525033193	0.091631369	0.771101841	0.862507752	0.788131958	1.101885639	0.352177428	0.421540838	0.324308018	0.132280581	0.703422422	0.074773303	1.903878636	0.038073252	0.235833778	0.186017272	0.865456203	0.558887109	0.195069388	1.395358553	0.414768822	0.260275169	0.088523625	0.260671013	0.098337831	0.29300331	0.530866823	0.323986698	0.187974029	0.225930842	0.463812309
E06000044	2009	0.390083465	0.513321469	0.519087493	0.384620125	0.145405561	0.16120105	0.528365733	1.749598428	0.250870409	0.378495713	0.197225347	0.241592936	0.312999695	0.727313007	0.65589725	0.212237335	0.72264046	0.50316806	0.087292637	0.76042488	0.839507169	0.774994599	1.088004372	0.349617678	0.410886731	0.313006177	0.122206774	0.688381121	0.068205849	1.879061429	0.037349657	0.226144846	0.179775245	0.820359789	0.565329038	0.190086301	1.268190773	0.403176934	0.251970115	0.103841372	0.258410323	0.098005958	0.276753468	0.514277153	0.310607524	0.181389247	0.210694438	0.441066792
E06000045	2009	0.381648842	0.508361551	0.513415998	0.388321192	0.142448615	0.157863407	0.52242109	1.816342189	0.246847424	0.375222325	0.195711093	0.235508331	0.310169068	0.725000592	0.645237229	0.209521031	0.71448248	0.497695753	0.087291851	0.744080017	0.833639957	0.765854973	1.080584374	0.345179204	0.403900666	0.308259931	0.118919507	0.67608674	0.068960319	1.863956689	0.036623518	0.222154019	0.177202281	0.808785335	0.556449705	0.188295102	1.236949426	0.398749718	0.24906507	0.107696994	0.256055122	0.097533838	0.277099167	0.514050636	0.307583088	0.176563264	0.205903265	0.436297175
E06000046	2009	0.466777059	0.567514793	0.599086052	0.437060158	0.172731323	0.206394988	0.600812444	1.846010086	0.286449917	0.438183812	0.246328507	0.303401103	0.346256088	0.76091748	0.746687644	0.242464031	0.836924198	0.537308811	0.089855662	0.895422978	0.939716105	0.964420829	1.262288585	0.434984194	0.492193125	0.362364939	0.134591062	0.83962637	0.072593941	2.240452117	0.041709522	0.255065314	0.221689948	0.914514014	0.6270102	0.221640394	1.496412633	0.512921817	0.29371247	0.086141729	0.323973808	0.123404653	0.345018174	0.652597512	0.329989875	0.211867195	0.243443609	0.466202341
E06000047	2009	0.41900802	0.536245699	0.54840664	0.413297906	0.152229297	0.181910171	0.549802255	1.826176033	0.268685614	0.406818957	0.222366412	0.272258588	0.316607901	0.743736791	0.695274818	0.224438705	0.777909185	0.517991777	0.086667058	0.824112296	0.885435458	0.873933081	1.173252979	0.394346941	0.446567682	0.340199843	0.122011596	0.769628747	0.06768773	2.083749074	0.039586512	0.235120664	0.199106643	0.852157502	0.599877559	0.201009847	1.363311974	0.465696049	0.269522981	0.092092547	0.29504612	0.111073206	0.302008571	0.588476697	0.317941024	0.189839613	0.221435484	0.443581615
E06000049	2009	0.446668118	0.556511544	0.570602465	0.418398209	0.163952998	0.188316397	0.579333222	1.68403805	0.266543178	0.415894871	0.221243056	0.282432963	0.338687115	0.722350079	0.714229373	0.226225869	0.798309227	0.531220092	0.089900515	0.836084246	0.892673791	0.883282236	1.168266038	0.395824459	0.455635123	0.345815786	0.130150421	0.785465558	0.071244162	2.07839835	0.040294437	0.242475448	0.20358529	0.877472901	0.586335594	0.204591772	1.56022041	0.472382058	0.272876936	0.087557355	0.297749601	0.108448189	0.316763218	0.597380782	0.320970968	0.198393319	0.23750693	0.463960512
E06000050	2009	0.437412036	0.552010049	0.563490231	0.413669545	0.159136714	0.183578617	0.569869177	1.69018648	0.264465525	0.408264657	0.218570426	0.275396482	0.332613386	0.722940514	0.70567145	0.22179106	0.787862994	0.532790193	0.090213491	0.826798602	0.884740399	0.865894276	1.159677827	0.389855409	0.450222093	0.342585203	0.128900074	0.776174647	0.070137752	2.060403146	0.039657267	0.240182234	0.201269546	0.868001058	0.58753383	0.202210879	1.517920385	0.463886921	0.270046744	0.091806722	0.290270903	0.107333654	0.309087194	0.591388869	0.320282245	0.195711678	0.233645859	0.45973205
E06000051	2009	0.457860126	0.564329888	0.58569718	0.428715933	0.167640278	0.194807098	0.592722439	1.752208616	0.272413751	0.425229942	0.229057848	0.290729194	0.34609322	0.737501	0.729383517	0.232827091	0.814812844	0.538508911	0.092627524	0.85987775	0.911461182	0.914742182	1.205303515	0.410208753	0.47057484	0.351694978	0.134357095	0.809773572	0.072296343	2.139518152	0.040274249	0.248489955	0.211319138	0.893100773	0.601612685	0.212043211	1.568849629	0.486619359	0.280153156	0.089002377	0.307334303	0.113495029	0.329621357	0.620677299	0.323674073	0.20479479	0.242314243	0.467022861
E06000052	2009	0.452222492	0.554018893	0.581668148	0.422737796	0.167188769	0.197685062	0.582839474	1.7833739	0.274167485	0.425456453	0.232469068	0.292661413	0.33967163	0.739035882	0.722978588	0.236723854	0.811056614	0.524014507	0.088248936	0.863705862	0.907850135	0.922415507	1.210708032	0.417068758	0.470942865	0.34951984	0.131377387	0.81165032	0.070331057	2.145157655	0.040346563	0.247172666	0.211259541	0.885870159	0.602753611	0.212105314	1.480244481	0.493367154	0.281557247	0.086967276	0.312208909	0.117015846	0.327577849	0.612618011	0.31887875	0.20341608	0.238397352	0.457266206
E06000053	2009	0.460045301	0.558270233	0.614069665	0.439913401	0.155203299	0.204709766	0.591421983	1.655363772	0.26988961	0.446639104	0.22431912	0.314639617	0.344462602	0.742234201	0.71502548	0.243456375	0.820845685	0.533812906	0.093331519	0.828833069	0.89893503	0.90789779	1.254631162	0.444637362	0.492502515	0.343679163	0.144168925	0.782956715	0.082521291	2.119753023	0.043013633	0.267908077	0.221993887	0.879728637	0.608807438	0.210353893	1.553250363	0.502745081	0.304607614	0.052009975	0.345402847	0.134337123	0.325296162	0.619800632	0.312687094	0.203279069	0.260734456	0.459275436
E06000054	2009	0.446957578	0.557598306	0.571137292	0.417341144	0.16358116	0.185405477	0.582643792	1.664213207	0.264527348	0.41626309	0.217436611	0.276855082	0.342163309	0.726026588	0.70807592	0.224091545	0.791926952	0.533800857	0.094503731	0.832786844	0.899035886	0.873472907	1.163458485	0.390487025	0.452406073	0.341530368	0.133061127	0.778180644	0.072333996	2.057811759	0.040438351	0.244345798	0.201394522	0.880301166	0.588398214	0.206227353	1.549698464	0.463121683	0.271637134	0.094687502	0.29231717	0.10648601	0.318283723	0.596698297	0.32088145	0.200069287	0.23741515	0.465048685
E06000055	2009	0.421762155	0.531496656	0.55134494	0.38965425	0.16214179	0.173536875	0.566496721	1.566860453	0.255835936	0.392325473	0.204249218	0.250450748	0.334874732	0.723282128	0.668210263	0.213804898	0.730469466	0.506971391	0.095561635	0.784929152	0.872941408	0.8020065	1.10635267	0.361643375	0.422996538	0.316531086	0.130023197	0.720961388	0.076583976	1.89213432	0.038825004	0.235746802	0.188772545	0.862446831	0.561677862	0.204751925	1.376491074	0.413852244	0.267702559	0.101855557	0.273763469	0.101595497	0.315028037	0.550769968	0.298804295	0.198188381	0.232287783	0.453921932
E06000056	2009	0.449630626	0.567554989	0.576284494	0.418026223	0.168481712	0.183049516	0.593713349	1.632449586	0.26235029	0.412586155	0.213615223	0.273064122	0.354156152	0.733234301	0.705259078	0.222980377	0.788102719	0.541361925	0.096023277	0.820694439	0.901149306	0.848990858	1.148206588	0.380197983	0.44549806	0.341970647	0.135361627	0.771379042	0.076937167	2.010972373	0.040609185	0.245826625	0.197402571	0.900686659	0.582069025	0.206529106	1.589669475	0.447822865	0.272089912	0.100048218	0.288762504	0.103865195	0.320472786	0.576563354	0.319890996	0.203508913	0.245200285	0.478803315
E06000057	2009	0.447931048	0.556555425	0.573959867	0.419643059	0.163815036	0.191705432	0.577248593	1.734337122	0.27101712	0.416708299	0.227513129	0.288066375	0.336028079	0.73194054	0.719856017	0.230099163	0.805606378	0.533143576	0.089253679	0.851153106	0.89955465	0.905303984	1.193592056	0.407524548	0.463096006	0.348778455	0.129673804	0.805942274	0.070191347	2.127111507	0.040205805	0.243728002	0.207640973	0.881170634	0.600536598	0.207097514	1.535124797	0.485458322	0.276804615	0.085200331	0.304443853	0.112690562	0.31902451	0.60539994	0.321195575	0.200338294	0.237211452	0.45837755
E07000004	2009	0.459285454	0.578271032	0.586190978	0.430039484	0.172386055	0.185021511	0.607134496	1.662194924	0.265041333	0.424908979	0.213795964	0.276028093	0.366434864	0.742113502	0.714418556	0.227346535	0.807998643	0.550241054	0.098080119	0.833938133	0.914374234	0.857740237	1.16041269	0.382318975	0.45173695	0.348020966	0.139665325	0.778925453	0.077174501	2.033398547	0.040885052	0.250700993	0.198629603	0.910926244	0.587271053	0.208634048	1.624009404	0.448939754	0.274080024	0.102506311	0.290442441	0.103234241	0.322788637	0.568048709	0.327496941	0.206213254	0.249022344	0.490773822
E07000005	2009	0.495164717	0.590356345	0.609235527	0.42623857	0.189308968	0.202008747	0.642248735	1.459039276	0.266410671	0.434749492	0.221129593	0.291453648	0.385379859	0.707640982	0.729235734	0.225659738	0.825236144	0.550819751	0.10024289	0.850082908	0.922265715	0.884903205	1.165951597	0.39125351	0.471247239	0.354468668	0.145007191	0.79959477	0.082735056	2.043884777	0.042167775	0.260082562	0.210526007	0.931544833	0.567377743	0.217748798	1.786412397	0.467801386	0.285730385	0.089062613	0.301937908	0.106734491	0.352696585	0.612947195	0.320653716	0.224395501	0.27140905	0.506617608
E07000006	2009	0.482726947	0.578595158	0.599601457	0.425100392	0.184884365	0.195857295	0.626600388	1.531940226	0.266633225	0.426319691	0.219771112	0.288197864	0.375367692	0.711497944	0.725187356	0.228134381	0.813264366	0.541116562	0.098314712	0.837617472	0.911705623	0.876269359	1.162559966	0.389482838	0.468842578	0.348289632	0.145318043	0.790083276	0.082164725	2.032012445	0.041387398	0.255403186	0.206591756	0.921770128	0.56552478	0.215231753	1.710570786	0.464994334	0.281142241	0.090607982	0.301558772	0.105851693	0.349650747	0.615898419	0.320385656	0.217423158	0.258905302	0.494618449
E07000007	2009	0.442765898	0.5463131	0.570463599	0.397903074	0.171916155	0.180547297	0.592853603	1.582229967	0.25651389	0.404669835	0.204816474	0.257532879	0.355851313	0.721482323	0.673368858	0.216577594	0.753686275	0.515419914	0.09749195	0.788178908	0.881187851	0.810212074	1.108973696	0.364728632	0.431748032	0.325045892	0.134488291	0.731297743	0.08264582	1.89317923	0.038843363	0.242841504	0.193129317	0.892209317	0.552200392	0.207272783	1.523121957	0.416735619	0.270915824	0.104936751	0.276630583	0.101973857	0.333331659	0.562554502	0.300195221	0.20406975	0.246252079	0.473582272
E07000008	2009	0.427248727	0.553785546	0.553109055	0.401906541	0.161787807	0.165189828	0.584042687	1.75168617	0.243207103	0.389576676	0.193852487	0.244679169	0.358188478	0.714971564	0.675884609	0.210814332	0.755243236	0.531702484	0.0927155	0.754910474	0.85782182	0.766816282	1.084768134	0.342258321	0.418602013	0.321822844	0.134051213	0.701139314	0.078693997	1.870490324	0.03709126	0.238811847	0.183215123	0.863007671	0.543666126	0.195548624	1.458326524	0.402665424	0.256252749	0.104455858	0.253424307	0.094665113	0.303676456	0.529854857	0.320736075	0.191270218	0.233267954	0.472980767
E07000009	2009	0.450265267	0.56614886	0.578081219	0.420595965	0.164217389	0.183387873	0.589298414	1.643377818	0.26862874	0.418786144	0.217311687	0.274336006	0.344870592	0.737420977	0.712762228	0.224821994	0.800586149	0.54617345	0.09629078	0.837137195	0.910395755	0.871313094	1.174882541	0.388015202	0.454438214	0.344750964	0.136039118	0.781164311	0.072994892	2.069210316	0.041381368	0.246705605	0.201946975	0.888795068	0.597144855	0.207993515	1.5677593	0.460281637	0.275088095	0.101480545	0.290983304	0.105754817	0.320264577	0.59625509	0.329256438	0.201634496	0.241236162	0.476237788
E07000010	2009	0.441698165	0.551047035	0.572942723	0.420601081	0.159803321	0.189857719	0.573657977	1.790910444	0.274445406	0.419501336	0.226785922	0.282704994	0.331832709	0.742408583	0.715365265	0.23011829	0.801069878	0.527790713	0.08986651	0.848840734	0.90350081	0.908553234	1.202793525	0.407985491	0.460811743	0.345002399	0.130532932	0.792012505	0.069473778	2.128046626	0.040081746	0.241003063	0.206028119	0.867370321	0.607659054	0.207650808	1.470947096	0.480899388	0.276410886	0.090363526	0.303341581	0.112344021	0.319597763	0.608015211	0.324659306	0.19885406	0.231929634	0.456732655
E07000011	2009	0.445343327	0.561869413	0.570401974	0.417370327	0.164380558	0.183019468	0.584752968	1.655824951	0.264962714	0.413719473	0.215013792	0.275198768	0.346342454	0.73188222	0.709415344	0.225830936	0.790912842	0.540165763	0.093798947	0.823657413	0.897084687	0.858369228	1.151458853	0.383928007	0.446894162	0.342487869	0.133241877	0.776254081	0.07382943	2.03301746	0.04053431	0.24435127	0.197190246	0.889830629	0.584902515	0.203459066	1.572643962	0.45407534	0.271196241	0.09396793	0.290691076	0.105062946	0.317259015	0.58291787	0.322506447	0.200194086	0.238089966	0.471073792
E07000012	2009	0.466430609	0.577265702	0.588285436	0.419500266	0.175434896	0.187917646	0.615100122	1.548229244	0.259762097	0.421627319	0.21082001	0.277369495	0.36878854	0.713099417	0.714453362	0.221569011	0.798983677	0.543569273	0.097570554	0.82419907	0.903399299	0.853002703	1.139215915	0.378476679	0.451265488	0.341678664	0.139278297	0.769369009	0.079258042	1.998661641	0.040816694	0.250748604	0.199800959	0.909182269	0.565005089	0.208420393	1.696077353	0.451754373	0.273943467	0.093634935	0.287465167	0.102174554	0.332116707	0.59168839	0.320198926	0.210003627	0.254341632	0.491465752
E07000026	2009	0.443243859	0.55218633	0.572816175	0.418088004	0.161629823	0.192144999	0.572837215	1.773206147	0.272024573	0.41857186	0.228982361	0.287214447	0.331937105	0.736609074	0.71973516	0.230476704	0.80109264	0.528531956	0.0880946	0.852046335	0.898413452	0.90494132	1.197590138	0.409239722	0.462482954	0.349302399	0.128213719	0.805745868	0.069365522	2.138879138	0.039944292	0.243982152	0.207656272	0.875245797	0.604181568	0.208370198	1.484626129	0.484071457	0.27645967	0.089131989	0.305303064	0.114080224	0.31794995	0.612968447	0.320494257	0.200184999	0.234965922	0.455679892
E07000027	2009	0.427567907	0.536841692	0.546920095	0.407831429	0.155661667	0.180248284	0.553993927	1.734025831	0.261724625	0.400838532	0.217548896	0.273926862	0.323483025	0.71939003	0.693959758	0.221773349	0.776068845	0.520873406	0.088062026	0.813558556	0.871246565	0.866214396	1.154005996	0.388017327	0.446316959	0.337236915	0.124476456	0.765949264	0.067083304	2.055878676	0.038260035	0.234417343	0.196941642	0.846406744	0.588374442	0.198083765	1.473882051	0.461762812	0.262771104	0.088980489	0.287455811	0.107569156	0.300214785	0.577274833	0.317658726	0.190338123	0.223930284	0.446712028
E07000028	2009	0.419844877	0.535159378	0.554154334	0.403942256	0.155133187	0.182019798	0.554456157	1.772212652	0.26298589	0.405516101	0.218772516	0.271685344	0.32376159	0.730793476	0.691023848	0.223426082	0.773776487	0.51485278	0.086637296	0.821530145	0.877296037	0.865672355	1.165499322	0.392768421	0.445935417	0.333981907	0.124969043	0.762450174	0.067632917	2.053045134	0.039093887	0.237203722	0.200187397	0.853375965	0.589881216	0.201940561	1.378080335	0.461403949	0.269531064	0.087897053	0.291674582	0.109642271	0.300249583	0.579254104	0.315912691	0.193193667	0.226000776	0.44480452
E07000029	2009	0.438433668	0.565054257	0.566799899	0.415947605	0.159333035	0.184614566	0.57252627	1.709459982	0.266683404	0.403793191	0.219283469	0.276020997	0.333779702	0.709279055	0.71624913	0.218481897	0.788440209	0.532534509	0.087408533	0.822113385	0.875438129	0.867671122	1.157784802	0.394377375	0.453592045	0.342963935	0.131530689	0.78875606	0.070260499	2.066557067	0.037471992	0.237154838	0.202652554	0.874055795	0.583241569	0.202092373	1.617607155	0.468451244	0.27107573	0.087038568	0.290652815	0.108827524	0.312800893	0.614015033	0.315479146	0.198024553	0.23963625	0.466035577
E07000030	2009	0.471069192	0.563892272	0.598388926	0.417667797	0.174731988	0.206400152	0.601830925	1.786287803	0.268589671	0.432522033	0.227411498	0.303199124	0.358774857	0.71135035	0.737137681	0.242697904	0.835193253	0.530371574	0.090068022	0.874285555	0.909703703	0.94803376	1.20631287	0.421329843	0.470988297	0.354565602	0.140200473	0.820298734	0.072283044	2.129063095	0.040183024	0.25016871	0.214743446	0.89550318	0.585544799	0.210153849	1.665856407	0.50571747	0.27871852	0.072676503	0.316353612	0.115498731	0.334615144	0.616035814	0.325557704	0.207803904	0.248696639	0.470177445
E07000031	2009	0.471543991	0.57060725	0.597233231	0.430458457	0.175041575	0.205111295	0.60301	1.704969093	0.274657474	0.430836433	0.238704341	0.304363392	0.351327746	0.723924094	0.737269845	0.237014635	0.829378	0.536983295	0.088652219	0.878759254	0.916910269	0.941009767	1.225161	0.42550744	0.487115124	0.357441682	0.136900134	0.837537782	0.073473363	2.194562182	0.040747241	0.256515206	0.220116613	0.908845268	0.599122247	0.218484352	1.619803684	0.513149435	0.286897174	0.07927973	0.316405517	0.118337238	0.342860993	0.65727427	0.3210175	0.210642779	0.248698591	0.465175214
E07000032	2009	0.439230193	0.553604623	0.569214215	0.418083748	0.15931084	0.186557541	0.571924955	1.775164925	0.270623913	0.416285959	0.223270709	0.28142415	0.332690868	0.744149252	0.713108467	0.228150559	0.796351361	0.533561124	0.090971816	0.843129071	0.895031068	0.885611951	1.183924293	0.399833662	0.456007777	0.346624252	0.129469781	0.794690158	0.069105937	2.106246527	0.040217918	0.243024426	0.203031311	0.875522943	0.602869621	0.20501111	1.488605847	0.473729376	0.276214419	0.088032449	0.298391455	0.11074685	0.309977027	0.604144691	0.322597057	0.196873744	0.232180466	0.458621534
E07000033	2009	0.414397355	0.529573369	0.552662142	0.399971027	0.151576725	0.181327653	0.548593267	1.751491017	0.265247607	0.402025768	0.219717983	0.267221634	0.31824176	0.750059444	0.685207339	0.224048807	0.762948502	0.514356624	0.089537902	0.82268862	0.884226172	0.867570905	1.170060229	0.393883374	0.441091122	0.330919867	0.122913779	0.759847719	0.066893858	2.052043787	0.039659996	0.234037352	0.196966811	0.852716296	0.599745988	0.202944529	1.339386511	0.456689306	0.27047538	0.090275863	0.29135589	0.111119955	0.302945009	0.580470506	0.313696419	0.193034289	0.22061255	0.446369765
E07000034	2009	0.423463571	0.541291269	0.557827615	0.413012455	0.153692634	0.18312919	0.556343322	1.813986686	0.26973715	0.412043488	0.223168009	0.271706585	0.319855933	0.751543637	0.70226699	0.225383428	0.776276902	0.522587178	0.089425182	0.832568547	0.895668592	0.875530432	1.183089295	0.396721352	0.450052533	0.339976437	0.124010301	0.770994434	0.068744281	2.091224776	0.039862354	0.238651938	0.201154556	0.862989019	0.607046968	0.205140187	1.360456694	0.463501192	0.273742429	0.095025739	0.294597061	0.111769069	0.305658776	0.584048033	0.319727653	0.192274871	0.225360377	0.44829897
E07000035	2009	0.475982532	0.576820783	0.600726505	0.431952848	0.176571204	0.203345159	0.609527168	1.667401889	0.275336845	0.426720101	0.234518286	0.303860236	0.356450163	0.72153164	0.738906695	0.233914438	0.829844779	0.54368897	0.09272302	0.872086122	0.916284537	0.932465085	1.211300255	0.418025625	0.481883271	0.3596578	0.139417968	0.833582259	0.074342305	2.160896489	0.040664338	0.253446551	0.217627871	0.915308375	0.596402807	0.215563004	1.697547201	0.50193984	0.286683279	0.076728596	0.314886863	0.116460294	0.345722758	0.63796739	0.321032608	0.211937055	0.254399695	0.470695667
E07000036	2009	0.432247074	0.556805057	0.565186026	0.422136551	0.157060585	0.182742379	0.568047253	1.798695889	0.268064617	0.411117606	0.220645192	0.275650207	0.331652209	0.745200825	0.71218589	0.225632561	0.794867657	0.538367722	0.090044988	0.834250084	0.897661915	0.877093909	1.176599154	0.394113541	0.451882973	0.347436748	0.12827401	0.779549876	0.070442959	2.090907595	0.039859704	0.239775701	0.200875557	0.872088247	0.603854396	0.202793795	1.489896647	0.467480541	0.270495468	0.100724623	0.295089859	0.108583171	0.30572653	0.591765832	0.327513093	0.192775113	0.229648316	0.462973249
E07000037	2009	0.445114925	0.563856256	0.566570034	0.42150818	0.161557007	0.182129809	0.57633871	1.704837046	0.262899749	0.412432093	0.215897505	0.279954367	0.34058963	0.725766731	0.711283141	0.223050403	0.799046263	0.545408578	0.092995204	0.83329029	0.890011251	0.870213528	1.164281067	0.389592843	0.455037568	0.344237557	0.131801165	0.781812434	0.070283928	2.083476213	0.040426972	0.243084418	0.200257409	0.875940758	0.594152262	0.201032656	1.605435709	0.468283062	0.267343342	0.088711252	0.288859113	0.103989887	0.303186577	0.592113244	0.327835849	0.195928486	0.23477351	0.464835598
E07000038	2009	0.44821528	0.560078314	0.577235155	0.42206591	0.162736492	0.192329593	0.58169786	1.715114352	0.272895689	0.418056438	0.229371561	0.288985268	0.334231225	0.738242381	0.717647876	0.228227896	0.805232941	0.540441472	0.091718874	0.857170818	0.905176281	0.90646244	1.20386318	0.410574443	0.468604653	0.349062916	0.131280209	0.811821002	0.070111997	2.152858506	0.040497633	0.245890226	0.211580165	0.884390845	0.606500678	0.210097759	1.530225673	0.489566002	0.281379139	0.083819665	0.306063099	0.112658845	0.32290621	0.63170778	0.320275365	0.201921463	0.238487108	0.457617218
E07000039	2009	0.424865012	0.548471448	0.55800575	0.401940673	0.154873344	0.175361056	0.562135572	1.675885566	0.262084096	0.404327362	0.211325672	0.263918658	0.329693042	0.745710477	0.693869033	0.218244239	0.773793108	0.537743122	0.09540169	0.818777257	0.892321591	0.843777922	1.153313979	0.378752726	0.4374285	0.335616407	0.129429287	0.761612743	0.069486915	2.032001177	0.040315557	0.239094863	0.194205373	0.863559207	0.600202979	0.20148181	1.459311601	0.447841886	0.268003596	0.09801097	0.282961274	0.103299961	0.300874978	0.593303012	0.323004659	0.193310068	0.22639969	0.454443915
E07000040	2009	0.480738154	0.567881266	0.605343014	0.441097747	0.178041791	0.212426451	0.611431664	1.678145853	0.281745265	0.440139904	0.247536286	0.30929208	0.350159531	0.722969725	0.744122537	0.240166206	0.832430824	0.530653124	0.090377146	0.898148679	0.928308658	0.969549334	1.244808674	0.436092098	0.500078235	0.35846403	0.136465004	0.844288089	0.073706661	2.229422755	0.041378029	0.258051004	0.226915687	0.910279487	0.602237919	0.225777634	1.571249722	0.519786919	0.294458844	0.082650555	0.327280449	0.122500002	0.360560474	0.682263752	0.314125343	0.217087081	0.252155804	0.462658474
E07000041	2009	0.401207269	0.527657024	0.530286887	0.396464096	0.145324299	0.166749406	0.537217191	1.785606594	0.25095731	0.387279059	0.204972819	0.248777836	0.313848572	0.721899798	0.667722621	0.211659412	0.744456936	0.517665075	0.088302337	0.779236383	0.849839083	0.802510992	1.116650714	0.363471746	0.42652461	0.320366941	0.121397318	0.714563883	0.067360507	1.967834218	0.037352548	0.231228948	0.187620281	0.819893485	0.573239462	0.193344647	1.325282256	0.429075442	0.256706414	0.096640953	0.264191185	0.099578385	0.282389957	0.55611665	0.317259216	0.182293965	0.213904059	0.44051695
E07000042	2009	0.447887624	0.556156812	0.576700165	0.422136719	0.163442801	0.191553851	0.577579323	1.712058494	0.268165789	0.422209205	0.224083546	0.285714941	0.338651601	0.724694336	0.716146729	0.230377233	0.80547614	0.531020968	0.089667182	0.855436439	0.896381097	0.902194842	1.189577692	0.406551561	0.461624184	0.344060056	0.131183343	0.798746329	0.068585702	2.11571845	0.040195398	0.244598891	0.207423429	0.872450625	0.598186875	0.20744182	1.541018086	0.480431443	0.274230621	0.089955622	0.300281466	0.110218515	0.314248577	0.597422971	0.321760829	0.200581754	0.238267643	0.459257678
E07000043	2009	0.448900631	0.544990072	0.580116566	0.416354627	0.162953399	0.198331407	0.574490198	1.748439356	0.278299461	0.424856751	0.233085711	0.2886958	0.329209809	0.742037166	0.721374627	0.236213221	0.803268757	0.519958082	0.088850364	0.867495966	0.906487761	0.921966159	1.212027505	0.418730781	0.471721639	0.347981163	0.128295977	0.813814746	0.068658497	2.149382226	0.041084402	0.245160456	0.212428835	0.874736422	0.605220874	0.212256149	1.413480865	0.493145815	0.28390285	0.087929019	0.315053319	0.117982218	0.328485904	0.616191184	0.314613056	0.202687893	0.236560384	0.451770269
E07000044	2009	0.490078923	0.583868362	0.615264562	0.431271625	0.184716433	0.213979368	0.623999227	1.715326507	0.278486784	0.442091974	0.24259032	0.313780863	0.365213175	0.733897477	0.757605565	0.244154407	0.85291184	0.545495656	0.090761095	0.899588889	0.93449672	0.963822184	1.243572007	0.437119287	0.496276983	0.367606246	0.14094815	0.856925374	0.074594692	2.207300572	0.041107491	0.262907201	0.225934874	0.934441921	0.603271867	0.222755529	1.67339401	0.521188927	0.295053414	0.079183272	0.326430595	0.12131122	0.351132719	0.646903383	0.325887551	0.218926684	0.258161247	0.479644026
E07000045	2009	0.468074845	0.565762312	0.592916625	0.42867961	0.171677299	0.203026148	0.599041517	1.756520904	0.278127656	0.435272254	0.237697973	0.299614687	0.345884965	0.737735996	0.739926198	0.23834547	0.825648527	0.535508343	0.090500671	0.881522273	0.922947172	0.939275523	1.227004221	0.42603964	0.48306565	0.356286549	0.135269316	0.83376688	0.072152844	2.190682116	0.041320136	0.25346636	0.217829205	0.900816381	0.607613898	0.216712314	1.560664429	0.507104069	0.286861708	0.083711737	0.315059505	0.117855639	0.340745219	0.642809877	0.322286389	0.208430592	0.245636696	0.465104111
E07000046	2009	0.463895889	0.557658691	0.593217847	0.417565745	0.171762242	0.206435439	0.587988126	1.713012228	0.275306758	0.430224271	0.236375027	0.300570181	0.344249229	0.728716421	0.731513427	0.237583418	0.819409994	0.5263332	0.086314814	0.879755352	0.904289032	0.937940121	1.220823617	0.427659081	0.47648001	0.350000041	0.130427613	0.83281265	0.070158539	2.163424795	0.040329681	0.251287003	0.218571773	0.896186915	0.601448326	0.214919339	1.532269341	0.504168502	0.286787726	0.079496961	0.319398539	0.119327628	0.331590438	0.620901728	0.317304183	0.211260319	0.246618495	0.458842774
E07000047	2009	0.486907438	0.575721136	0.607748562	0.426732536	0.179936794	0.208519822	0.616489598	1.734485693	0.272377489	0.440036573	0.234242009	0.309120322	0.364772012	0.721199634	0.747824465	0.239726354	0.841157283	0.53655767	0.090074255	0.882816382	0.917770596	0.948524368	1.219561745	0.427196981	0.486285249	0.356221179	0.142391254	0.839130077	0.074076418	2.169786701	0.041448249	0.255892696	0.218548696	0.913970804	0.590075029	0.217313669	1.689750356	0.512479548	0.285391832	0.078826039	0.320448922	0.11586867	0.346088126	0.630679495	0.321629944	0.213624015	0.254856244	0.47242401
E07000048	2009	0.471100284	0.553237908	0.598674574	0.42345608	0.175933592	0.211741413	0.601906517	1.664579946	0.278651547	0.438549743	0.246124	0.303584106	0.341997364	0.72389453	0.72957848	0.236221598	0.809732804	0.513445092	0.089278188	0.892468808	0.915565712	0.954464917	1.235312572	0.435095593	0.494145936	0.349299911	0.135066341	0.820401668	0.073474002	2.195591668	0.040959372	0.254859781	0.229170811	0.893472772	0.596229545	0.228099973	1.463140623	0.507578971	0.295404397	0.085306157	0.324368231	0.123510964	0.357013063	0.672602726	0.304564796	0.218874216	0.251415112	0.458122907
E07000049	2009	0.485568543	0.569924658	0.608413308	0.439127854	0.176652856	0.212684674	0.61531653	1.613622497	0.281851484	0.43924612	0.247242525	0.30971664	0.348987782	0.716927522	0.743694405	0.239007288	0.83380997	0.535286444	0.09074192	0.897834781	0.92261819	0.965001692	1.239171216	0.435460182	0.497955248	0.360509834	0.139468379	0.851229863	0.07319685	2.22064742	0.041650466	0.257229215	0.228853207	0.907813684	0.598685559	0.223456783	1.632215022	0.522966671	0.296921219	0.079487716	0.328608901	0.121528828	0.359186727	0.678554928	0.314112716	0.217352482	0.256790365	0.469579934
E07000050	2009	0.456805047	0.558177923	0.583101648	0.421982649	0.167465254	0.197783173	0.588176774	1.717959972	0.273359262	0.428062255	0.231593332	0.294812949	0.343043588	0.729468779	0.720617734	0.235246505	0.811556781	0.52436669	0.088349262	0.864340906	0.905491375	0.926207887	1.208578688	0.415265383	0.469573535	0.34880293	0.134660489	0.812507661	0.070538553	2.141472406	0.040880841	0.248333816	0.212507469	0.887942172	0.597821938	0.213286583	1.526858849	0.495147648	0.280577174	0.084104397	0.311309352	0.11485705	0.332393404	0.625332954	0.321165182	0.205400401	0.239630846	0.460832837
E07000051	2009	0.475403006	0.574621655	0.600252136	0.434804292	0.172351941	0.20250997	0.60648104	1.650342093	0.276695165	0.432071088	0.234133095	0.301081907	0.351415322	0.723970854	0.724489704	0.23388986	0.8285079	0.544120208	0.097952008	0.884373241	0.920945195	0.941031875	1.221468711	0.422238055	0.486295758	0.351351196	0.137942788	0.820929301	0.073639351	2.184694588	0.041544496	0.253706929	0.222677329	0.900843339	0.598851729	0.218562032	1.610085958	0.500326568	0.287284029	0.080446507	0.3180165	0.115622299	0.34124254	0.650602419	0.319122236	0.212163573	0.252134971	0.464818768
E07000052	2009	0.486123106	0.572592377	0.609687878	0.432785155	0.180673398	0.212154719	0.616002528	1.722161605	0.279380501	0.440247836	0.245337194	0.310304081	0.355598177	0.723773948	0.747073539	0.23948598	0.838052564	0.533552333	0.090789967	0.892513114	0.929550298	0.965722176	1.243370576	0.436388278	0.496535034	0.359846336	0.139107331	0.850482502	0.074814785	2.216903068	0.040774044	0.258232839	0.226878139	0.915438063	0.59909696	0.224553509	1.617138729	0.522435543	0.294422021	0.080458667	0.326308319	0.12227624	0.358925024	0.66870927	0.315647151	0.216705969	0.255112161	0.466832719
E07000053	2009	0.431134533	0.541349086	0.563308069	0.42420284	0.157405473	0.192680144	0.558213372	1.835709099	0.278013214	0.416629793	0.233829574	0.28611268	0.321516853	0.744757809	0.709600298	0.231610964	0.800927479	0.51647911	0.084320477	0.851761529	0.897857233	0.913152269	1.208117858	0.413193004	0.46393856	0.350343755	0.124189768	0.801130728	0.066832793	2.153380117	0.040603126	0.241439426	0.208653411	0.870130662	0.605320398	0.207401619	1.375669019	0.491703315	0.279033473	0.088068769	0.311054195	0.118292042	0.314175748	0.612636821	0.318066153	0.196545726	0.225298229	0.444477849
E07000061	2009	0.448861889	0.553343144	0.577960234	0.426367854	0.167672431	0.194708533	0.58524291	1.813934854	0.276383236	0.424623853	0.232607591	0.283907573	0.339773374	0.74483111	0.720865091	0.233174533	0.801859349	0.52408911	0.091138724	0.856839271	0.914687172	0.911733829	1.212764339	0.410960056	0.472553103	0.346584436	0.131359848	0.789173656	0.073440305	2.134788057	0.039999446	0.248391264	0.212410281	0.889705245	0.601428723	0.216254207	1.418400739	0.480118378	0.283433831	0.096478035	0.303858589	0.117363347	0.32854337	0.612572203	0.319579342	0.204165506	0.237995679	0.462701043
E07000062	2009	0.423783043	0.554095064	0.559352982	0.417047244	0.157860741	0.179322471	0.562330597	1.820032238	0.26344707	0.407540496	0.215997611	0.270007728	0.332888427	0.751011232	0.70073683	0.225579103	0.78257287	0.5321033	0.09510933	0.830295173	0.898372987	0.863416887	1.175093906	0.391210981	0.44809275	0.334490049	0.124950472	0.762469425	0.070747301	2.067524782	0.039761038	0.242512448	0.198887424	0.871678608	0.604315206	0.204912077	1.396771166	0.455503236	0.269394006	0.09878324	0.285335959	0.106963124	0.293706065	0.572363299	0.324134234	0.193577954	0.229456114	0.459307917
E07000063	2009	0.47925581	0.580644286	0.603320144	0.446731835	0.17841818	0.203195707	0.616227196	1.769917519	0.280175018	0.440274089	0.238369362	0.30072343	0.359086603	0.744683161	0.742383502	0.237500563	0.834143	0.542166612	0.094650554	0.88239862	0.933784396	0.937470753	1.23045519	0.421521087	0.489853984	0.360278941	0.139198181	0.833797065	0.075656814	2.187163723	0.041779409	0.258804786	0.219166215	0.919776866	0.603968567	0.222648715	1.598026416	0.498226275	0.292506351	0.090272597	0.316321687	0.117652331	0.347259609	0.641459816	0.322498798	0.21400237	0.252312324	0.477879349
E07000064	2009	0.50341654	0.581588649	0.628392283	0.443777093	0.192552847	0.222139803	0.6377627	1.727796608	0.279813038	0.449202755	0.249119935	0.321770416	0.375192889	0.725488248	0.762174223	0.244671846	0.851692746	0.530091568	0.091711536	0.907391647	0.939112279	0.984731749	1.259296991	0.444837367	0.510935482	0.363364159	0.144540989	0.859272945	0.079497282	2.226417803	0.040615618	0.264222388	0.233349161	0.939949965	0.594081956	0.232534578	1.682547887	0.52725659	0.300985251	0.084361185	0.335471842	0.124673542	0.372431371	0.665876992	0.312691612	0.227273342	0.266932282	0.477930717
E07000065	2009	0.493369602	0.590913537	0.616139665	0.443751348	0.184632927	0.210604039	0.631018065	1.663865011	0.277536448	0.445740592	0.239172022	0.310981071	0.372976274	0.726363425	0.754552148	0.241035046	0.853129201	0.550215458	0.093828062	0.8906978	0.937132911	0.950751859	1.230167691	0.425613462	0.493750633	0.366081585	0.142788098	0.843086813	0.077911643	2.191754945	0.042329228	0.261474703	0.222035486	0.934564967	0.59904699	0.221876656	1.735373102	0.511169285	0.290944402	0.084919767	0.322344141	0.116648052	0.352959233	0.640895268	0.328238592	0.219304505	0.261939235	0.48946801
E07000066	2009	0.433161927	0.549691338	0.56034536	0.413598155	0.162885058	0.17745092	0.575840107	1.668993111	0.26049656	0.404502138	0.212171254	0.261958351	0.339861988	0.732563305	0.690098437	0.218863522	0.767960792	0.527335466	0.094414654	0.806161237	0.888648782	0.831530748	1.136400265	0.375216706	0.436816972	0.331780591	0.130542949	0.749196788	0.075476683	1.983233314	0.039663835	0.239550725	0.193757736	0.876419233	0.579010505	0.204377052	1.455842638	0.43640391	0.268547756	0.10700033	0.281397387	0.103521114	0.31378965	0.56700416	0.314528876	0.197481258	0.232956567	0.464810956
E07000067	2009	0.446128602	0.566865054	0.57038007	0.428551628	0.164452479	0.184299639	0.583541958	1.724674337	0.26648657	0.419094381	0.219109299	0.278376838	0.345803848	0.739418511	0.714768492	0.228266102	0.803056692	0.541624281	0.09208109	0.833715126	0.905296576	0.871874209	1.170372907	0.389105551	0.453782925	0.34846135	0.132073885	0.781426993	0.073534904	2.071457172	0.041416192	0.245840664	0.199223292	0.893933201	0.594477873	0.205112687	1.56435955	0.463354551	0.27030825	0.101688261	0.293607494	0.106397025	0.31487038	0.589209668	0.329157556	0.197896141	0.235593415	0.471297105
E07000068	2009	0.481686917	0.594845108	0.597746495	0.43867838	0.180312281	0.191215493	0.627737218	1.560289793	0.265010338	0.426222972	0.218606767	0.288912612	0.373237909	0.711443439	0.730045636	0.220792653	0.821840803	0.563228993	0.099071158	0.839653651	0.913184434	0.872649135	1.157824242	0.384833586	0.466901858	0.354830694	0.14184871	0.792078533	0.080253139	2.075147278	0.04095823	0.254216922	0.207124474	0.911512372	0.573741686	0.211429535	1.80498088	0.468280511	0.277532044	0.09242049	0.290564999	0.103606421	0.338227611	0.621181709	0.328949704	0.213481262	0.261291253	0.500772933
E07000069	2009	0.461879692	0.565669729	0.591506403	0.430885433	0.172367716	0.198185577	0.600365658	1.672498951	0.270851205	0.421203593	0.231182555	0.292207134	0.352226268	0.733265126	0.719789968	0.229712661	0.805875065	0.53474669	0.09222669	0.852212811	0.909918007	0.903423173	1.195323825	0.409728237	0.469205074	0.349647012	0.133397996	0.815738569	0.075896404	2.110523567	0.040498671	0.248173697	0.211843126	0.905668248	0.584935868	0.216022946	1.602202232	0.486571062	0.283118614	0.091065159	0.31237491	0.113445759	0.340421498	0.62238963	0.311231596	0.209613553	0.248984456	0.470121986
E07000070	2009	0.449987353	0.564268261	0.577359142	0.418123637	0.166058253	0.185368605	0.590071467	1.616569841	0.267429455	0.414678563	0.217862207	0.27535377	0.34631388	0.73136332	0.713068094	0.224386975	0.796750733	0.545538582	0.094907834	0.831003983	0.904674204	0.863397066	1.163386863	0.386022939	0.451784721	0.34683457	0.133440551	0.779241172	0.073757166	2.045920796	0.04109913	0.247347769	0.202688636	0.89362802	0.588869563	0.206533678	1.565179391	0.456902483	0.276399543	0.096372594	0.290558516	0.106193519	0.31705936	0.583456635	0.326427338	0.202803971	0.242928693	0.476816387
E07000071	2009	0.428187498	0.542982783	0.556245719	0.39912258	0.160482074	0.176363956	0.570215244	1.64066057	0.259552701	0.401311949	0.209222686	0.261383736	0.336909461	0.727917685	0.684930137	0.217687283	0.759584355	0.522440711	0.092727567	0.798728182	0.880802224	0.828534678	1.128479697	0.371966952	0.432268163	0.327897659	0.131484455	0.745553988	0.073067175	1.963274205	0.039209828	0.238239575	0.192703019	0.869319277	0.574343188	0.201948934	1.447540819	0.434186362	0.268092701	0.095318157	0.277172799	0.103107345	0.309233508	0.564046746	0.313764502	0.197152225	0.230682767	0.459199166
E07000072	2009	0.459047184	0.566776823	0.585936028	0.429504	0.173435191	0.190114681	0.604742862	1.674544341	0.267131203	0.424223622	0.221301383	0.279471274	0.358230646	0.737880602	0.71611802	0.227677108	0.80050305	0.536118798	0.094759476	0.834837523	0.915719014	0.874445231	1.170637567	0.392775359	0.458906175	0.347564642	0.137818763	0.776647861	0.079047191	2.053636836	0.040677677	0.24988589	0.203227113	0.911936347	0.584152936	0.213242498	1.572575004	0.462327167	0.278489244	0.101401348	0.294595847	0.109030297	0.333204706	0.59135965	0.321277577	0.205991348	0.246954649	0.484454089
E07000073	2009	0.407118632	0.526151406	0.543768443	0.400918093	0.154948435	0.170991025	0.55362086	1.641851256	0.255024543	0.39395927	0.20643613	0.246527414	0.326111183	0.742965061	0.661910222	0.214783236	0.725440313	0.507855848	0.09527785	0.786089279	0.876031665	0.802017763	1.114165541	0.363428764	0.418341891	0.314487126	0.123815533	0.708772497	0.075078985	1.910502837	0.038816834	0.234548761	0.185643005	0.859763672	0.575296511	0.205220109	1.25857305	0.409859378	0.26396684	0.116117873	0.270921457	0.10298103	0.30726946	0.535607026	0.303684551	0.192655688	0.220754013	0.450108329
E07000074	2009	0.490103141	0.598455199	0.610600004	0.435414412	0.180232628	0.200497813	0.627418174	1.638808765	0.272463836	0.432720901	0.22790703	0.303005387	0.370119937	0.729798923	0.747243426	0.229817955	0.840379968	0.566334032	0.0975123	0.869106363	0.928182409	0.918808939	1.204511393	0.410628481	0.47713172	0.364331768	0.142272071	0.832324059	0.079114745	2.151072398	0.041336553	0.257324193	0.216220463	0.936358184	0.597200112	0.215044189	1.839031711	0.49498847	0.287089686	0.084925411	0.304287998	0.111773767	0.34170792	0.632846829	0.331656822	0.215822897	0.26635255	0.496374424
E07000075	2009	0.459507673	0.566824871	0.589057275	0.424144616	0.168489301	0.195293402	0.596640604	1.653356597	0.27729752	0.425250269	0.230097216	0.288596408	0.344673271	0.740216082	0.732043138	0.232920485	0.813249314	0.541326739	0.091994222	0.862232117	0.918994814	0.912125837	1.200322379	0.408216867	0.468979536	0.355117138	0.13479414	0.811197773	0.073190606	2.134136949	0.041646093	0.24889994	0.21103644	0.900859177	0.604661557	0.212563337	1.586074409	0.485035385	0.28420308	0.088922479	0.310159242	0.11334508	0.333889105	0.624028365	0.324277152	0.207719456	0.246036394	0.474298487
E07000076	2009	0.466698226	0.556527679	0.592497454	0.433548116	0.173122099	0.206097529	0.595531917	1.728356772	0.281367637	0.430334196	0.245032419	0.302096191	0.338097832	0.729598518	0.730476597	0.233858236	0.816810326	0.522834225	0.089206383	0.878313456	0.913100443	0.948777577	1.23548112	0.429252199	0.488979742	0.353167342	0.131760747	0.832809257	0.073073233	2.204294479	0.040423834	0.251317843	0.223092597	0.892480713	0.602328086	0.222101313	1.504948593	0.507316527	0.291669235	0.087828866	0.320941456	0.122644254	0.348534103	0.664455952	0.309978347	0.212445549	0.245453586	0.455306624
E07000077	2009	0.470029997	0.583792558	0.594865487	0.422891755	0.172725752	0.192050903	0.614890634	1.611797468	0.266393974	0.427286741	0.217622651	0.281140588	0.365710358	0.728156992	0.728991599	0.228139998	0.818378757	0.551003725	0.096715672	0.851388269	0.918271851	0.879364501	1.169214889	0.391762243	0.459836126	0.352207891	0.140755859	0.790068612	0.075813972	2.061331177	0.041680681	0.253020588	0.203991642	0.913960051	0.586646906	0.21072889	1.71222068	0.46608767	0.27574451	0.096980748	0.296415709	0.104339445	0.330726273	0.602288582	0.327863282	0.209652691	0.253674848	0.495995897
E07000078	2009	0.430385738	0.554954673	0.556534042	0.412588775	0.159842756	0.172550665	0.574972955	1.699299415	0.248927022	0.393978026	0.205825918	0.260769285	0.343645772	0.71098424	0.684760605	0.212097214	0.767555889	0.536701661	0.093646083	0.787693557	0.869493179	0.816631852	1.122723484	0.364304602	0.436905213	0.328665754	0.131274522	0.734238863	0.073883903	1.971580029	0.037782954	0.239712217	0.193095968	0.860898753	0.564567962	0.199209551	1.515368298	0.434258838	0.261869891	0.094933267	0.267984288	0.098704753	0.301747622	0.565964747	0.323677986	0.193852962	0.231382626	0.46198314
E07000079	2009	0.473852906	0.574475783	0.601987177	0.429706129	0.173634622	0.202081896	0.608630643	1.717593512	0.275666165	0.434919061	0.234857224	0.297946868	0.354139352	0.73415937	0.738608601	0.23618707	0.830245465	0.54461749	0.09366689	0.882053795	0.92660046	0.937420304	1.22221568	0.421493837	0.483395734	0.355798109	0.138520385	0.823039417	0.072943008	2.17553101	0.041388526	0.254650656	0.218368075	0.908880343	0.603422412	0.217955943	1.611539701	0.499695923	0.287435093	0.083059519	0.312884048	0.115421255	0.343356279	0.633771033	0.32419391	0.210666272	0.251691278	0.477242088
E07000080	2009	0.451018317	0.553213764	0.577016813	0.424230566	0.163451993	0.195863117	0.578376332	1.742138587	0.275065446	0.42293653	0.231500167	0.293500803	0.334911041	0.73149701	0.719214514	0.233240153	0.812916577	0.526004941	0.08801553	0.854165857	0.903446626	0.922555415	1.201995017	0.412813667	0.468070385	0.351768379	0.12956053	0.812144426	0.069476469	2.141622304	0.040469178	0.242643945	0.209648172	0.876245567	0.600376004	0.207777134	1.518982495	0.492370482	0.279643455	0.082330707	0.313757322	0.115382071	0.329395787	0.613196766	0.319809036	0.199939859	0.236922298	0.455107515
E07000081	2009	0.404942153	0.527201642	0.534193172	0.401797683	0.14913143	0.168086264	0.538907889	1.719191941	0.254169633	0.392203676	0.204472878	0.253454507	0.320491913	0.733800333	0.670436743	0.21671403	0.744781206	0.515995023	0.088992177	0.787061936	0.864247092	0.811854562	1.116041724	0.364588954	0.422256852	0.323023543	0.122897192	0.719327188	0.068742168	1.953066009	0.03857361	0.229814132	0.18318673	0.839059962	0.578888851	0.194545248	1.349426924	0.424083516	0.254663046	0.109877753	0.271166626	0.100177117	0.285712403	0.53686456	0.316342989	0.184269239	0.21433203	0.447108236
E07000082	2009	0.463336124	0.565508644	0.584506313	0.421144106	0.17229333	0.19425766	0.597916574	1.638854021	0.263369709	0.420841386	0.220074043	0.290832893	0.357415245	0.71512711	0.71926204	0.229624138	0.810234178	0.533432129	0.092178253	0.844309092	0.898622946	0.893860068	1.17143143	0.399460218	0.465480471	0.346589478	0.138711992	0.79360261	0.07426354	2.069589009	0.040171487	0.248284013	0.20657971	0.896100337	0.578169049	0.208783974	1.635100114	0.478199279	0.275305659	0.081923995	0.302925557	0.107560069	0.324435678	0.593952823	0.319565701	0.206500039	0.245921167	0.471132836
E07000083	2009	0.448215236	0.556682891	0.577695711	0.416538046	0.16548921	0.19150882	0.586204041	1.663187772	0.270530885	0.41856869	0.224624816	0.283519473	0.339573221	0.732054334	0.713377225	0.227664419	0.796447699	0.528863619	0.092358976	0.842109252	0.905189726	0.89561721	1.183893375	0.401222394	0.459325274	0.343348316	0.132866247	0.792888381	0.072945046	2.085494669	0.040515841	0.244881051	0.208486262	0.885141727	0.593941901	0.209994079	1.512387725	0.47318427	0.278931416	0.088958187	0.301923317	0.111479413	0.327653898	0.616367428	0.318550898	0.203785039	0.241002545	0.465024841
E07000084	2009	0.44744739	0.576424105	0.572612639	0.426429933	0.164308217	0.177453992	0.592072371	1.651867132	0.264988589	0.418542567	0.213906398	0.2727027	0.351063813	0.741826987	0.709152938	0.224277021	0.804541112	0.560221217	0.096784915	0.822881543	0.91066242	0.850976505	1.160324984	0.377398183	0.447006164	0.347407323	0.134780557	0.779760055	0.075253685	2.060119623	0.040656822	0.246232146	0.196453414	0.894007136	0.596961184	0.20349976	1.618679378	0.450398607	0.271132746	0.10453457	0.283824867	0.102570704	0.312348303	0.583050228	0.334830689	0.199547798	0.239606492	0.482128731
E07000085	2009	0.478216955	0.588592428	0.601187698	0.432995123	0.176897005	0.196433012	0.619954221	1.629283581	0.273402836	0.433760303	0.227439376	0.295034489	0.363814677	0.734535939	0.738417864	0.231834048	0.831894483	0.556833527	0.097067951	0.863761818	0.930350081	0.911594761	1.199082491	0.404581226	0.475481766	0.358377264	0.141539734	0.81318593	0.077593273	2.136339929	0.041901325	0.256263171	0.211945225	0.922849086	0.598149917	0.214440169	1.745497586	0.486582419	0.284389885	0.087766068	0.305078773	0.109907115	0.340048865	0.625978233	0.329283868	0.211247175	0.25624327	0.490692092
E07000086	2009	0.456848026	0.577548939	0.584722334	0.427950514	0.168010765	0.185727741	0.598731328	1.693799772	0.267978309	0.423041167	0.21851538	0.278020454	0.35309051	0.746413183	0.724676583	0.226363791	0.807887964	0.5563343	0.097688508	0.84351619	0.919493501	0.87560072	1.179809512	0.3919989	0.458271564	0.348509186	0.135831394	0.789194311	0.075555919	2.088574895	0.041513225	0.249156208	0.202511523	0.903694445	0.599444934	0.209042057	1.622465719	0.464791547	0.27639843	0.102890704	0.293152141	0.106073061	0.321362909	0.597748188	0.330425752	0.20442759	0.245181388	0.485981846
E07000087	2009	0.471232484	0.58503903	0.599350624	0.441785146	0.171117665	0.196153517	0.611936006	1.714904145	0.279152032	0.435240761	0.233460437	0.296151305	0.354801014	0.749751071	0.742435782	0.234069011	0.836457538	0.56196732	0.095937776	0.87751161	0.936130956	0.925730002	1.224133852	0.412354412	0.479148338	0.361868583	0.13829353	0.825178294	0.074799512	2.188451724	0.042572889	0.254296711	0.215068709	0.917468127	0.615439689	0.215357347	1.673861052	0.495399678	0.286475258	0.091152194	0.310494404	0.112565584	0.337921484	0.642030272	0.336310986	0.209924104	0.250613232	0.484923054
E07000088	2009	0.437531266	0.56582245	0.563773517	0.425619593	0.154448711	0.176020492	0.569665803	1.7281656	0.26623532	0.409980544	0.215294184	0.27174434	0.333405027	0.741994792	0.7096921	0.217688128	0.790563633	0.555498959	0.095847985	0.836666506	0.891218725	0.862357476	1.175364059	0.387431394	0.452846233	0.34041123	0.129919304	0.774789187	0.068563795	2.110581877	0.04036429	0.240972883	0.200776944	0.868722254	0.608033502	0.203087481	1.555058514	0.460381666	0.267032481	0.106945534	0.282815682	0.102109352	0.298331433	0.595960763	0.331304397	0.19444492	0.231134028	0.464171058
E07000089	2009	0.488374024	0.603381222	0.609185136	0.433567811	0.178837025	0.19069367	0.632974864	1.595916919	0.268612098	0.438193186	0.217002246	0.287760857	0.378592872	0.735610269	0.741146657	0.228457294	0.839346843	0.575055195	0.100238659	0.858363947	0.926747747	0.876306964	1.173532016	0.387532988	0.468083292	0.361850394	0.146998144	0.803413494	0.078023866	2.098672868	0.041837669	0.258530481	0.20763497	0.930940654	0.589693999	0.211409123	1.852630612	0.468805439	0.280558321	0.095933475	0.289521284	0.10300644	0.331555821	0.610896364	0.337265624	0.212126147	0.261292028	0.510217573
E07000090	2009	0.451892916	0.561393837	0.581589075	0.423956149	0.165385585	0.191155675	0.588287663	1.722730085	0.272016727	0.418793462	0.227514148	0.283478542	0.340577688	0.741637986	0.717945298	0.227960754	0.799869683	0.541650736	0.095359872	0.857677156	0.90995117	0.896661966	1.199253661	0.406564395	0.469039464	0.346007853	0.134426441	0.800572552	0.072711044	2.129870525	0.040358079	0.247620202	0.211437198	0.88492976	0.603897521	0.213505013	1.518718076	0.480487727	0.281849733	0.094999681	0.30143114	0.110868778	0.326732509	0.631041251	0.317951524	0.204810525	0.239593236	0.462815253
E07000091	2009	0.485877697	0.581119585	0.615471543	0.442288158	0.179380255	0.210741369	0.622346818	1.735635613	0.285415835	0.445838626	0.245056414	0.308822568	0.359386302	0.746062634	0.755933182	0.242758345	0.844858572	0.546246362	0.093636168	0.903523225	0.940174563	0.963392423	1.252067461	0.436248989	0.497519791	0.364872048	0.141294409	0.854647438	0.07486664	2.233004795	0.04176327	0.260655787	0.226481573	0.927219848	0.612324663	0.225144395	1.623425442	0.517240476	0.298584569	0.086499072	0.326086377	0.121414699	0.356580816	0.666447453	0.323467986	0.218340134	0.257000619	0.479844142
E07000092	2009	0.429328864	0.557993375	0.555389621	0.401403547	0.161393708	0.164436621	0.579872648	1.597239653	0.250964436	0.396206727	0.195435911	0.242063384	0.347546186	0.744018497	0.670227949	0.20866501	0.742143227	0.546901607	0.104341044	0.778437819	0.885058321	0.772051389	1.099191218	0.345129646	0.41712777	0.321949663	0.13049713	0.715551335	0.076204293	1.909434932	0.04017457	0.239609191	0.182850919	0.874100513	0.571535102	0.199404221	1.484511472	0.399821636	0.262527999	0.117887009	0.260933421	0.093155479	0.296059609	0.548902882	0.31918928	0.198993844	0.235087849	0.47265941
E07000093	2009	0.465638553	0.579391503	0.592274364	0.42923325	0.171201857	0.192419279	0.605800859	1.655596189	0.272103745	0.427439053	0.223998342	0.287890159	0.356290712	0.742781947	0.732251425	0.231164266	0.818004252	0.554136057	0.096838821	0.858088321	0.923485086	0.898953424	1.195262604	0.402415756	0.470210018	0.353470783	0.141650519	0.813338261	0.07556849	2.112986058	0.042041871	0.254071974	0.208932787	0.912361113	0.603154327	0.212479335	1.645702799	0.482153032	0.282191975	0.09113849	0.303132215	0.109196204	0.330477401	0.61866109	0.32917011	0.208704063	0.249882617	0.482048742
E07000094	2009	0.475590329	0.587524452	0.598963285	0.433034745	0.176064899	0.196507518	0.614105574	1.664470883	0.271750969	0.432440633	0.22716876	0.291680131	0.362018277	0.727033413	0.738093658	0.233144948	0.836151644	0.552685253	0.092437918	0.856992869	0.923998615	0.903957407	1.193171304	0.402456863	0.475625062	0.362986957	0.138309841	0.804609252	0.077583953	2.119265147	0.041379003	0.25651324	0.211852583	0.918642055	0.592434187	0.213245544	1.71331831	0.481976443	0.281957125	0.093862946	0.300869532	0.110616685	0.336889229	0.611456504	0.332629461	0.208447213	0.256118521	0.495106501
E07000095	2009	0.435126172	0.549904268	0.563371087	0.416770201	0.160786362	0.180094327	0.575503959	1.615772247	0.257543098	0.408077033	0.211416035	0.26383928	0.344540638	0.736437487	0.689712104	0.221279193	0.769984143	0.532543456	0.094242834	0.811251685	0.891892009	0.840114744	1.139928679	0.37798377	0.439684504	0.332329171	0.130634053	0.755953285	0.074403646	1.99457119	0.040325389	0.240067119	0.192244799	0.883186763	0.5758327	0.204861374	1.503988926	0.441916641	0.265963906	0.103327916	0.286713453	0.103060275	0.311690506	0.562837744	0.315725291	0.198987054	0.232697229	0.477921087
E07000096	2009	0.441712386	0.560218868	0.566454769	0.420266841	0.165253408	0.180017792	0.580207981	1.641908998	0.265258625	0.410686595	0.211886158	0.269632489	0.34417923	0.730404912	0.705462277	0.222974042	0.781849633	0.531097808	0.094006952	0.814671792	0.89551164	0.846623076	1.142307221	0.3761667	0.445602479	0.341216275	0.131334941	0.758801046	0.074727531	2.006907023	0.04053917	0.242862139	0.194849664	0.885581743	0.579896629	0.204775478	1.53458735	0.445626386	0.269936427	0.102372964	0.287243692	0.104013945	0.316401269	0.571251411	0.317408264	0.197124905	0.238675527	0.471722274
E07000098	2009	0.453928078	0.561297241	0.580915236	0.40746547	0.176994731	0.185835491	0.610408723	1.575846327	0.252873342	0.417019156	0.20512397	0.264599648	0.374159797	0.723184648	0.69203311	0.221108798	0.772602341	0.521584947	0.098974276	0.808330205	0.899801915	0.824961744	1.116310867	0.369101631	0.440195384	0.329905329	0.138630652	0.733939556	0.082216705	1.91076214	0.039495298	0.249370357	0.191755799	0.905587409	0.558529221	0.208902885	1.543253494	0.425338329	0.270240173	0.10094101	0.279777582	0.100744301	0.328638271	0.544852806	0.308208014	0.209515564	0.249726911	0.488351813
E07000099	2009	0.447181322	0.555811029	0.572930228	0.401748097	0.170661627	0.182620555	0.593228963	1.539908624	0.263332737	0.40972266	0.212040548	0.266688823	0.349605549	0.72777516	0.69414551	0.219127259	0.770572326	0.527951469	0.098304497	0.810132153	0.896462989	0.836200275	1.135727548	0.373705249	0.440420629	0.334399405	0.134934961	0.753992366	0.078280033	1.968902767	0.040424579	0.246273123	0.199194915	0.895045135	0.570773398	0.209312061	1.509595256	0.43590214	0.275871456	0.096610026	0.282907509	0.10492259	0.329029405	0.585388925	0.313077197	0.206680146	0.246154194	0.4738208
E07000102	2009	0.456419063	0.555642313	0.579034881	0.393352355	0.180127108	0.184144911	0.60845809	1.48198157	0.257210539	0.406740031	0.20682608	0.264869859	0.36641194	0.714736901	0.69012983	0.217316459	0.757488079	0.520118596	0.09868964	0.801822865	0.890776028	0.814997675	1.113694897	0.365695315	0.438410809	0.327166335	0.14098124	0.74148641	0.0819755	1.896366752	0.039690005	0.247604515	0.195665505	0.907445837	0.55421682	0.211178579	1.542969947	0.4232705	0.275976649	0.094940656	0.2790362	0.102167574	0.335045916	0.564243066	0.303202212	0.212746606	0.254118461	0.480602448
E07000103	2009	0.419429286	0.543169149	0.540136456	0.397961925	0.162979453	0.162257305	0.570605278	1.589372	0.248401299	0.389361172	0.191751093	0.24083775	0.344674611	0.713965218	0.663793764	0.207920689	0.734816031	0.521176941	0.095582759	0.752091218	0.861172871	0.764674831	1.068828714	0.337297623	0.408415219	0.31726425	0.130090225	0.692489092	0.078138714	1.842963046	0.039131646	0.233693208	0.178017973	0.86321384	0.545748048	0.195768802	1.447502104	0.390782983	0.255751578	0.113346629	0.25699951	0.092644745	0.303431767	0.524586683	0.312846196	0.189381298	0.228910307	0.466291576
E07000105	2009	0.440495234	0.554835756	0.565266598	0.415965428	0.160609096	0.182740579	0.575060237	1.637988095	0.268892024	0.415312225	0.216153425	0.27169996	0.33621954	0.738416987	0.707817006	0.225086133	0.786352261	0.536357395	0.094476311	0.832979808	0.899911253	0.863535939	1.161184295	0.387002535	0.449976868	0.341649208	0.131313341	0.77362776	0.071430433	2.0502646	0.040951601	0.244097747	0.198461918	0.879808472	0.595092715	0.204980686	1.502422081	0.45724584	0.272256746	0.100720723	0.290402775	0.105837746	0.311650173	0.584881764	0.322193196	0.19904331	0.234292541	0.466457698
E07000106	2009	0.438435724	0.55300132	0.565713216	0.418499279	0.161176992	0.185622786	0.573008729	1.806725975	0.267405926	0.410979535	0.223742349	0.274306306	0.334382407	0.737133107	0.711759202	0.224935148	0.793561634	0.530559244	0.089415514	0.830315782	0.895034033	0.872302905	1.173751609	0.392173281	0.457436134	0.343060471	0.128714921	0.775481747	0.071925647	2.073187317	0.039925793	0.243760638	0.20204838	0.870933913	0.591760091	0.206345219	1.456812396	0.464265242	0.271739734	0.1007653	0.290800251	0.110286268	0.317044641	0.602780708	0.321802596	0.197611513	0.230361306	0.460293308
E07000107	2009	0.434187298	0.539295437	0.559702193	0.380415475	0.174554797	0.172204303	0.589413414	1.517844781	0.247156952	0.390061148	0.194271554	0.243398911	0.359474533	0.719823102	0.661660658	0.209611325	0.718590107	0.508345435	0.10032729	0.762643926	0.871972543	0.763453231	1.07391312	0.343239221	0.413108335	0.309584472	0.13639281	0.707106829	0.084441011	1.802514038	0.039391551	0.240850066	0.182987018	0.884366141	0.541225893	0.205234638	1.406568854	0.392791416	0.266711367	0.105185623	0.265466036	0.096153077	0.32383263	0.538489131	0.295171126	0.207188068	0.242994221	0.46053934
E07000108	2009	0.456534037	0.566884444	0.582059669	0.431471999	0.169263645	0.193017026	0.592662055	1.798852844	0.273589008	0.423003585	0.230917005	0.287877992	0.345972084	0.745757999	0.720139752	0.22919787	0.810634373	0.538170098	0.092940457	0.850307364	0.915488163	0.904983684	1.206141613	0.408844549	0.471442698	0.352093958	0.134518006	0.805842388	0.074460367	2.135525918	0.040295969	0.250242192	0.210689638	0.900245237	0.603279691	0.214557474	1.534889343	0.484714879	0.282774987	0.098739022	0.304528526	0.113749617	0.331487713	0.629563567	0.321388485	0.204576008	0.239193333	0.465007062
E07000109	2009	0.431016633	0.540980071	0.556438417	0.402093696	0.163832198	0.177088447	0.570970305	1.639653996	0.258429198	0.399468799	0.208648615	0.260526946	0.340044434	0.729551446	0.683471526	0.218965057	0.759968067	0.518298563	0.093717224	0.798787434	0.878652858	0.826592706	1.12593647	0.370682207	0.434907054	0.327969572	0.133535628	0.740607938	0.075057425	1.944140789	0.03931306	0.237712031	0.191427606	0.863708451	0.572092763	0.202557246	1.444862949	0.428725811	0.265972025	0.103918885	0.28185498	0.101757135	0.3109015	0.557402665	0.311748709	0.197305597	0.231045503	0.462407348
E07000110	2009	0.452921076	0.569310891	0.580133236	0.422555064	0.165728041	0.186140514	0.591448182	1.671103766	0.269826334	0.418694674	0.220420948	0.278074745	0.347460955	0.74260616	0.720222476	0.227237633	0.803971917	0.550280416	0.095605135	0.841515781	0.914063495	0.877438621	1.180053946	0.392350078	0.457463401	0.34882711	0.136749949	0.788817825	0.074103201	2.074100953	0.041177692	0.248757141	0.202906138	0.896718026	0.601063002	0.208484917	1.560815458	0.46514453	0.277021687	0.099431929	0.29447079	0.107837983	0.320262709	0.601133218	0.33054738	0.203042099	0.240977587	0.477409402
E07000111	2009	0.483356691	0.587367633	0.605529368	0.437861748	0.18179157	0.199499467	0.626957321	1.671716015	0.270269051	0.437694357	0.227373514	0.294323896	0.373403821	0.729200638	0.739273038	0.234384489	0.834374584	0.548109725	0.095346536	0.861264774	0.926133667	0.903298686	1.191784645	0.403928437	0.473452222	0.357180453	0.140926193	0.80605706	0.079552059	2.097584751	0.041796764	0.25667283	0.210376297	0.925958979	0.587603479	0.21607491	1.714542216	0.47900929	0.282688597	0.100160319	0.306233228	0.109986546	0.343615996	0.606080479	0.326439674	0.213918807	0.258074997	0.497255205
E07000112	2009	0.451907071	0.559900851	0.578311376	0.428237277	0.168964128	0.192588047	0.587760212	1.752637391	0.271284179	0.420222268	0.228019712	0.286680728	0.343378766	0.732963257	0.718634151	0.228980875	0.802734676	0.528314389	0.091702313	0.844539074	0.90241028	0.897079814	1.191607473	0.405224118	0.466364617	0.344569882	0.131373003	0.795547573	0.073169658	2.111557619	0.039656309	0.247040642	0.208297316	0.888812828	0.59291484	0.211735297	1.534390512	0.478200219	0.279554528	0.092532679	0.300810455	0.112541668	0.326728496	0.615029318	0.316435391	0.203960714	0.240028756	0.462697808
E07000113	2009	0.433804103	0.549104399	0.560767692	0.421109034	0.159659087	0.18199121	0.566849203	1.726120061	0.270495911	0.41193597	0.219796886	0.271619177	0.330366943	0.745965789	0.701750279	0.224982015	0.784409192	0.530344554	0.092657598	0.826740716	0.901339364	0.867924082	1.17077279	0.390854285	0.447603562	0.343420043	0.128566816	0.777243969	0.071871104	2.060837626	0.040760194	0.240929691	0.197643234	0.876791324	0.599002119	0.204768863	1.453132815	0.459801113	0.272266509	0.102339965	0.295453327	0.109052442	0.312115238	0.591425947	0.320766332	0.196186347	0.228969118	0.460071931
E07000114	2009	0.446672342	0.555218057	0.57617588	0.425181431	0.162004727	0.192957669	0.574508747	1.793669572	0.279021855	0.425466061	0.22996601	0.286157871	0.330953865	0.749920114	0.722968038	0.231955616	0.809147189	0.533242198	0.092437803	0.867060991	0.915127619	0.91950998	1.218289192	0.414471498	0.468476824	0.34823648	0.128196605	0.80065178	0.068735603	2.15864921	0.040305754	0.245233387	0.210747225	0.877841878	0.618195243	0.211740485	1.435282257	0.483976465	0.281178412	0.098954598	0.302408259	0.116307847	0.316093177	0.606655152	0.32684599	0.201171206	0.233495194	0.462495145
E07000115	2009	0.45906902	0.573260022	0.580303364	0.427939707	0.16632718	0.186661181	0.593758971	1.648217105	0.27201638	0.424508266	0.219518488	0.28021143	0.347801218	0.735806005	0.728381978	0.228007436	0.814420027	0.552523112	0.09423143	0.845380139	0.914672608	0.883467688	1.173428415	0.391278341	0.460439198	0.354467586	0.135077792	0.791266543	0.073658031	2.08797942	0.042083668	0.247865405	0.202953413	0.895174224	0.598088608	0.20649845	1.639938102	0.467368075	0.27474796	0.099525179	0.295719832	0.106336163	0.320617792	0.598039811	0.33157184	0.202183592	0.243786958	0.485638703
E07000116	2009	0.463462913	0.57290501	0.584215217	0.415534409	0.172203842	0.188101383	0.603899941	1.644622017	0.267215074	0.425919981	0.212584401	0.280745709	0.363858482	0.725889856	0.721257558	0.230451081	0.808726828	0.538148166	0.094206428	0.829151189	0.902585555	0.869304915	1.148769884	0.383197151	0.457936175	0.349908308	0.139036127	0.777122728	0.076008754	2.032641288	0.040261511	0.249499919	0.200108996	0.897952791	0.573034524	0.206070189	1.65001863	0.459910109	0.275450779	0.089177288	0.289672712	0.104765342	0.323950872	0.577565622	0.327261085	0.203732234	0.246754186	0.488683603
E07000117	2009	0.408065711	0.517289134	0.533934538	0.398501749	0.15574679	0.174151518	0.539501477	1.790577376	0.251732374	0.391972992	0.206797397	0.257706664	0.323164485	0.718485547	0.665694344	0.220597131	0.737690466	0.487617483	0.084501242	0.779744079	0.851285457	0.818544377	1.10809738	0.372842096	0.420311087	0.317704182	0.123525902	0.722246871	0.071270841	1.926796167	0.037628871	0.228724822	0.184738371	0.836766626	0.564728949	0.19616668	1.320672498	0.430285382	0.255371832	0.103582583	0.278907458	0.104482131	0.294236702	0.521728981	0.297638492	0.184988453	0.218654112	0.435493721
E07000118	2009	0.428345238	0.548743592	0.555812998	0.417099987	0.153811544	0.179709646	0.559234491	1.719291411	0.265897194	0.407356677	0.217991598	0.271974567	0.324511794	0.738259207	0.69770302	0.22289894	0.783588951	0.533244544	0.090358961	0.825120037	0.888250331	0.866410094	1.161964272	0.387553813	0.445033536	0.343189606	0.125921338	0.770703714	0.068435276	2.065266544	0.040402067	0.237972989	0.196803303	0.860431229	0.599314491	0.200338818	1.463620375	0.461226278	0.267887295	0.096182363	0.290382116	0.107536951	0.302209157	0.584930057	0.323239277	0.191105587	0.225484168	0.456404896
E07000119	2009	0.470027195	0.56597262	0.591244546	0.424888544	0.175088287	0.200656501	0.600377881	1.717633797	0.271866444	0.425409626	0.233395397	0.300578784	0.351131655	0.718985013	0.734448182	0.232293283	0.815465092	0.531420126	0.090921419	0.864048305	0.906847877	0.926570808	1.20853301	0.417680939	0.479067861	0.354252522	0.13512282	0.817361589	0.07372718	2.151953228	0.039752093	0.251652503	0.217072797	0.903780332	0.588600157	0.215892624	1.614724203	0.498924723	0.284012296	0.080633641	0.310294781	0.115552833	0.339017379	0.629697908	0.316780316	0.209073695	0.252015354	0.465888179
E07000120	2009	0.388155925	0.496797556	0.520620543	0.371843777	0.149288744	0.166999284	0.525352813	1.667407867	0.250250881	0.378660446	0.200967208	0.241804897	0.309684025	0.712147539	0.638314065	0.212826004	0.699000398	0.469675767	0.08783503	0.758105475	0.837132829	0.785794819	1.077799066	0.35788848	0.402883842	0.301716307	0.119434294	0.690371629	0.071534866	1.846984457	0.036683329	0.221740533	0.180244435	0.81876162	0.556408649	0.195413021	1.210664417	0.401899128	0.254471988	0.099650876	0.270559586	0.102769912	0.297981996	0.515459577	0.285417227	0.183675433	0.213049659	0.422705536
E07000121	2009	0.428147792	0.541915519	0.551708185	0.411154617	0.157571662	0.180248524	0.558128863	1.772093066	0.260470136	0.4018021	0.216715721	0.26912787	0.325808036	0.719389947	0.694516651	0.220174637	0.775684928	0.520148301	0.088263114	0.81153036	0.87355397	0.855108025	1.149298474	0.385006742	0.445882954	0.33678989	0.125623164	0.762914836	0.070034296	2.038936483	0.038729319	0.236840253	0.196362586	0.851971177	0.580481463	0.20070772	1.454347354	0.457732528	0.264576748	0.096501514	0.286337466	0.107212782	0.305575883	0.584712098	0.315321018	0.191151008	0.226157655	0.449666969
E07000122	2009	0.389098365	0.499328774	0.525014765	0.378551432	0.149480584	0.166724494	0.524986939	1.660739753	0.249662758	0.378721665	0.202910797	0.242471712	0.3092046	0.7096773	0.638451834	0.209573637	0.702638386	0.471455025	0.085690375	0.762413284	0.836728496	0.781888405	1.083349445	0.358247738	0.403816423	0.301078074	0.121990571	0.694012286	0.071065702	1.846982573	0.03652445	0.22221314	0.182386918	0.821314534	0.55448561	0.198003646	1.211532355	0.403027411	0.259112619	0.106834255	0.267771914	0.103169959	0.305051667	0.519126199	0.282977516	0.185185308	0.21170098	0.421870192
E07000123	2009	0.369106992	0.479154784	0.501357012	0.352298118	0.143979075	0.155989771	0.510262251	1.596162221	0.241164883	0.361261032	0.190370611	0.227103178	0.299274481	0.700125342	0.60914027	0.203718353	0.667148969	0.460405295	0.085647124	0.721507659	0.805083559	0.735163268	1.034811297	0.334949541	0.385150855	0.289073354	0.118192247	0.65252844	0.069980389	1.75196811	0.03567469	0.214509974	0.17293427	0.793674112	0.531616909	0.189550637	1.124219077	0.374052343	0.250056981	0.098208943	0.249491296	0.097015371	0.283571027	0.496991498	0.281342254	0.178878825	0.202641429	0.417864245
E07000124	2009	0.454600631	0.562954006	0.574388209	0.423987348	0.167800564	0.191984878	0.585377868	1.637308421	0.268744158	0.419102008	0.224000273	0.289468424	0.342851556	0.720421353	0.718544531	0.227745474	0.803615407	0.531555462	0.090786196	0.845064696	0.899792631	0.89591784	1.172947288	0.399593182	0.463582499	0.348408114	0.132389272	0.799550947	0.071871028	2.100102591	0.041940479	0.247712283	0.205496629	0.888348967	0.587254128	0.208084369	1.60599393	0.479604057	0.27624337	0.081948452	0.304683848	0.10982957	0.326748385	0.609607243	0.319032194	0.20154688	0.241724511	0.463039584
E07000125	2009	0.409769236	0.519891694	0.53984855	0.383988507	0.15658585	0.17647098	0.546164854	1.644082184	0.258266404	0.390793375	0.208143308	0.262309318	0.324370549	0.718423674	0.666446474	0.221105817	0.746525882	0.498226237	0.086438482	0.784927167	0.860877151	0.823178536	1.117220053	0.375126612	0.425754824	0.326597839	0.125451951	0.738531104	0.069951715	1.927047405	0.03806114	0.229855379	0.189816058	0.854263645	0.569259627	0.19717605	1.35534299	0.43471537	0.266450184	0.090110562	0.283939755	0.106627253	0.300998941	0.543121869	0.305945452	0.191437606	0.222427832	0.445075434
E07000126	2009	0.429127928	0.545343355	0.555339386	0.409399123	0.153353259	0.179005837	0.558780567	1.631267534	0.26478046	0.404534733	0.214569472	0.270771632	0.323894721	0.726429463	0.697864422	0.220596792	0.778466878	0.533481119	0.091677948	0.824061082	0.879930014	0.858132904	1.153384639	0.38538405	0.443592173	0.336774511	0.125956465	0.768071477	0.067629681	2.049979052	0.040282515	0.237017799	0.198763372	0.859748848	0.593384966	0.199730049	1.475548093	0.455390993	0.268750236	0.090150458	0.286391363	0.105168517	0.301348286	0.584173454	0.318767869	0.193741688	0.230158902	0.45391717
E07000127	2009	0.426360654	0.536226174	0.550879968	0.408167903	0.156464417	0.181148798	0.557797071	1.716666843	0.26382707	0.402052763	0.218227592	0.270967521	0.322763435	0.725298008	0.685800013	0.219603554	0.768933964	0.517474442	0.087490422	0.814646471	0.87199637	0.854029636	1.148129197	0.386418457	0.444415644	0.336922981	0.127484363	0.768737296	0.068520976	2.036777397	0.038889881	0.235435548	0.197742722	0.850511914	0.582916174	0.201346374	1.430222236	0.455972069	0.269662004	0.08815254	0.289543938	0.107383924	0.305636401	0.592585738	0.31028613	0.192952274	0.225264092	0.44601201
E07000128	2009	0.456987322	0.55225858	0.584894385	0.426750234	0.16703342	0.19992183	0.586558967	1.78951002	0.274383058	0.428074863	0.235897706	0.295848159	0.338861388	0.728874753	0.725008968	0.235490314	0.810672978	0.52243551	0.087983931	0.86867293	0.906502584	0.93353577	1.21566385	0.420758271	0.477822219	0.35053708	0.13281607	0.812879605	0.070507668	2.169151157	0.040458449	0.24738224	0.216490057	0.881875685	0.599473953	0.215052775	1.497118046	0.499995002	0.281797429	0.087061979	0.314096876	0.117381652	0.335836029	0.640216605	0.315471727	0.205025574	0.239161246	0.454915787
E07000129	2009	0.447729815	0.557943495	0.572312616	0.411337442	0.164528514	0.18412891	0.585959146	1.60565851	0.261717429	0.413101823	0.21701308	0.272734422	0.343492367	0.727192066	0.703983832	0.222416085	0.783112349	0.536824696	0.095854691	0.825788527	0.897741342	0.857885442	1.153678501	0.385739236	0.448413404	0.338775499	0.133788452	0.77080826	0.073728655	2.03429822	0.040488465	0.244518503	0.200944551	0.883998567	0.585518833	0.206921466	1.555449982	0.454021587	0.273187574	0.095596071	0.28863502	0.105551616	0.319455383	0.595261983	0.317065414	0.202803768	0.239955605	0.469907979
E07000130	2009	0.417164797	0.527568482	0.545619693	0.392469892	0.158477093	0.174460422	0.559275864	1.641444823	0.252464869	0.391624895	0.206606028	0.253597765	0.328094409	0.71740647	0.667548514	0.213687462	0.735819538	0.504817925	0.092629128	0.781539139	0.864490098	0.807292551	1.107389251	0.364622237	0.426090797	0.317719845	0.128469055	0.72862751	0.074670896	1.920744806	0.03864207	0.235179378	0.188952648	0.85311056	0.560148018	0.201665092	1.391601854	0.425719826	0.263527111	0.096241133	0.277642657	0.10293439	0.313149226	0.566553182	0.299378393	0.194815198	0.227096387	0.444810543
E07000131	2009	0.450650144	0.557085029	0.573653527	0.416532933	0.165482154	0.189637786	0.58477722	1.603810957	0.270386428	0.419931397	0.222044206	0.281385365	0.341649292	0.727273576	0.717603112	0.229802456	0.798959134	0.529901978	0.091779523	0.843328732	0.90533183	0.889664802	1.172246342	0.394523356	0.458991143	0.348746598	0.134513548	0.786621057	0.072055558	2.062219108	0.041626358	0.246231131	0.203869399	0.889652037	0.59199724	0.208071606	1.546819605	0.468840148	0.276472992	0.085812138	0.299397507	0.109873525	0.322077767	0.590810507	0.321634865	0.202698339	0.238779677	0.468557996
E07000132	2009	0.443086846	0.559258438	0.573579178	0.419064903	0.161821174	0.188069676	0.579368422	1.737454841	0.269757087	0.417127607	0.223975262	0.280840964	0.335930856	0.7415548	0.714246538	0.227809018	0.797333483	0.535783448	0.09241015	0.842601949	0.904624219	0.888918737	1.182708845	0.398827064	0.456340484	0.345439438	0.129937575	0.792902905	0.072027698	2.097761246	0.040856214	0.243877922	0.204541014	0.882794129	0.599687406	0.207191631	1.516772115	0.47390839	0.275269299	0.093019378	0.299797554	0.110500843	0.319056654	0.611394596	0.321295724	0.199349318	0.237184927	0.461790065
E07000133	2009	0.449345771	0.557360592	0.576694788	0.417671706	0.161376124	0.189284945	0.579592385	1.739685636	0.272360555	0.422855751	0.224492225	0.285594414	0.33609557	0.74071038	0.725246405	0.233800947	0.813049925	0.542435581	0.089643577	0.857604196	0.910643419	0.906050637	1.195061524	0.406012458	0.464292082	0.350246302	0.132489627	0.799661843	0.069277496	2.130535413	0.041220139	0.244991514	0.207152045	0.884920272	0.607255958	0.205682312	1.557340692	0.484106809	0.275906556	0.090460732	0.301720259	0.110449196	0.315826254	0.59952821	0.330954092	0.198231418	0.238217466	0.469983755
E07000134	2009	0.445229799	0.564141934	0.570710151	0.422256294	0.159775994	0.180991704	0.576096057	1.703362924	0.265114275	0.41121449	0.215386123	0.2772153	0.339034018	0.728575629	0.710424096	0.220581576	0.79432011	0.543995564	0.094764519	0.834224932	0.89446465	0.867836794	1.167322674	0.387183499	0.452323411	0.341442054	0.134642161	0.778067392	0.070739264	2.077028567	0.040450419	0.241591061	0.198811423	0.871860235	0.598233945	0.203213212	1.609431807	0.462891317	0.269838383	0.095813747	0.288197029	0.104929749	0.309770612	0.593892394	0.323456379	0.197304232	0.236627806	0.463733255
E07000135	2009	0.426628678	0.524405242	0.562264371	0.388052828	0.166752061	0.183355402	0.576481339	1.609159848	0.261632381	0.400973669	0.217199434	0.25827728	0.337477315	0.73502662	0.678336497	0.222535952	0.734949478	0.496718634	0.093559958	0.809208419	0.881363804	0.824782718	1.128433733	0.379076774	0.432849296	0.318767966	0.136642494	0.739337165	0.077955652	1.933600906	0.038869022	0.240139861	0.195874728	0.870453824	0.567598429	0.213200493	1.307674128	0.427923686	0.276571312	0.099891643	0.289403431	0.106049531	0.331352664	0.578885094	0.290650909	0.203775751	0.23196059	0.450454051
E07000136	2009	0.425292444	0.537859393	0.561243059	0.416409464	0.153684917	0.184958208	0.557981719	1.802125028	0.269835996	0.415275035	0.222734949	0.273127131	0.320787376	0.74470814	0.704691636	0.226675643	0.784232556	0.522623153	0.088647435	0.842046861	0.891098175	0.889033279	1.187647245	0.402165533	0.45165271	0.336843225	0.123758886	0.774893137	0.066527107	2.105442966	0.039604018	0.236818736	0.201869542	0.851361298	0.604395104	0.205544777	1.372994561	0.4678562	0.272777763	0.101086753	0.297438309	0.11137399	0.30651207	0.598297101	0.317890546	0.193181366	0.225259705	0.448797824
E07000137	2009	0.464671944	0.555954294	0.59549911	0.423766506	0.172293593	0.208508049	0.596422486	1.755050394	0.278825956	0.431207381	0.243644969	0.303868736	0.341565528	0.732578229	0.727858365	0.237456683	0.819481421	0.523765337	0.087629832	0.881367564	0.912001959	0.952207414	1.235735861	0.4348447	0.484397429	0.35393513	0.134379246	0.847644612	0.071110873	2.19933004	0.040132448	0.251579159	0.223156263	0.900066303	0.60371898	0.219227861	1.513519573	0.513622962	0.293242555	0.078825263	0.32547144	0.123007106	0.346805091	0.659921139	0.310882496	0.21252923	0.246528682	0.452920409
E07000138	2009	0.392748761	0.521105695	0.521348115	0.401805201	0.143563664	0.162962479	0.524331104	1.860343779	0.249485758	0.382187482	0.202484206	0.246051341	0.311845681	0.723766163	0.662504397	0.211743829	0.741750617	0.512366142	0.08654147	0.766113695	0.846444318	0.799573431	1.108390372	0.361009977	0.416075719	0.320195914	0.117439268	0.711866912	0.066679021	1.947509734	0.036336771	0.224622197	0.181759234	0.813676573	0.571728581	0.188015257	1.324587828	0.422565533	0.24943197	0.104729163	0.264546516	0.099697003	0.273700502	0.527131348	0.317386995	0.177078592	0.207217564	0.437340888
E07000139	2009	0.452941874	0.564043975	0.582022785	0.426560262	0.163309732	0.192725462	0.584803344	1.674242748	0.274879976	0.424029215	0.227844873	0.288763863	0.339397358	0.743449369	0.724459163	0.232201023	0.810321869	0.544523764	0.092955968	0.86705914	0.914705618	0.910903946	1.202457209	0.408263991	0.467549818	0.348952202	0.132561521	0.806901523	0.070608641	2.144779392	0.041687503	0.248442318	0.210302529	0.892177239	0.609672439	0.210693025	1.532783887	0.485165602	0.280148234	0.086939237	0.307586995	0.11150327	0.323904855	0.620881693	0.325449501	0.2042943	0.239629156	0.464481239
E07000140	2009	0.445520486	0.551601235	0.577108795	0.42412086	0.16311807	0.192559979	0.58135548	1.730066612	0.271259753	0.417519927	0.230503433	0.284535972	0.334238403	0.735379612	0.710083492	0.229693678	0.794860306	0.528170404	0.090894785	0.851458961	0.900925027	0.900260058	1.19495999	0.40787902	0.464854449	0.343751694	0.13207304	0.798766793	0.072217534	2.122080021	0.039808744	0.244149303	0.21027417	0.876321272	0.597518831	0.212462325	1.469029808	0.482417197	0.280406055	0.093277607	0.307700964	0.113460614	0.329178445	0.632292982	0.312067039	0.202755917	0.23618581	0.452911608
E07000141	2009	0.4498865	0.561250662	0.576835994	0.417625057	0.166172838	0.188309817	0.588596034	1.661493938	0.264670681	0.415780017	0.219578971	0.28015472	0.345963449	0.727319025	0.71178734	0.22509948	0.792742932	0.535807102	0.094105009	0.840010729	0.90293166	0.882333652	1.170435723	0.395603666	0.455318951	0.340585231	0.133652543	0.78677452	0.073974512	2.070838564	0.040417451	0.244941122	0.203744049	0.886961472	0.590461559	0.208004789	1.570067776	0.468819551	0.274546193	0.087892985	0.29738421	0.107242323	0.32084795	0.600331182	0.317805745	0.203303663	0.241298912	0.464681276
E07000142	2009	0.448170981	0.554852855	0.577821906	0.423693671	0.162930522	0.196332139	0.578800248	1.758726942	0.278206801	0.423935751	0.234677372	0.290196897	0.330802169	0.744100258	0.726062007	0.232790679	0.811518029	0.530415038	0.088801256	0.858332519	0.914857485	0.924631987	1.212469781	0.414862376	0.467711077	0.35593929	0.127904845	0.821166483	0.070659956	2.160720689	0.041505703	0.244803414	0.209788863	0.881778324	0.613516358	0.209530601	1.492026675	0.493914329	0.281905667	0.086339979	0.314576006	0.117076157	0.328922339	0.631973954	0.324406918	0.201108364	0.234851447	0.458452599
E07000143	2009	0.446679575	0.556263259	0.578106653	0.422949793	0.1597338	0.192132373	0.578508483	1.753320746	0.272395941	0.423877407	0.227910586	0.283121963	0.333396765	0.739167942	0.718067503	0.228759089	0.802041933	0.536969601	0.091917022	0.859886774	0.903479885	0.909598782	1.204763728	0.411195439	0.466175043	0.343380716	0.129328882	0.803663162	0.068796617	2.146878027	0.040664979	0.244618133	0.210865483	0.874262332	0.607856154	0.209456289	1.494636321	0.485352293	0.278354806	0.093188138	0.304966819	0.111846109	0.32113032	0.62539864	0.321259179	0.201284634	0.23577773	0.456911015
E07000144	2009	0.471039516	0.576231086	0.599873837	0.434447658	0.170544268	0.202025252	0.605483283	1.730162544	0.279972545	0.436170777	0.236901064	0.301741285	0.350968005	0.747605777	0.745951072	0.240217624	0.836019074	0.552610304	0.092912377	0.889507115	0.932688736	0.943975643	1.234397104	0.42475731	0.486621835	0.360623167	0.13875978	0.834601525	0.072915015	2.208761904	0.042192375	0.255678651	0.218170401	0.91255369	0.617144199	0.21760155	1.611493629	0.506165731	0.287682929	0.08765974	0.31664797	0.116029745	0.3391407	0.647458963	0.330623627	0.210782618	0.247871725	0.475921691
E07000145	2009	0.434576554	0.538710429	0.565167344	0.420080833	0.156711327	0.192146744	0.558540967	1.847622304	0.277231645	0.419307797	0.230204146	0.283208149	0.320199853	0.750345535	0.713931777	0.232478139	0.799146719	0.521209274	0.086115141	0.856192964	0.895570944	0.911638105	1.209927948	0.413096109	0.462672946	0.347665368	0.124918378	0.79629724	0.066226715	2.140364821	0.039770491	0.238793875	0.207593628	0.855417285	0.614337211	0.206343988	1.391802154	0.4846515	0.277342622	0.096534227	0.307921205	0.116739656	0.308296468	0.607892299	0.320791563	0.195786719	0.226337711	0.449384374
E07000146	2009	0.452015045	0.553056362	0.585352488	0.430098847	0.167650473	0.199807684	0.586390424	1.77701659	0.27699012	0.42659826	0.237028819	0.293201772	0.338642764	0.741898899	0.720962883	0.23636376	0.80889341	0.523559397	0.088227072	0.864055351	0.909634049	0.924446674	1.217427376	0.420242679	0.472915375	0.350963952	0.132152292	0.815766217	0.072259827	2.153211546	0.040374493	0.247459071	0.215049273	0.888341929	0.603322308	0.215282577	1.470398185	0.495335369	0.285275521	0.095130729	0.317420126	0.118466478	0.33634671	0.632421925	0.314787088	0.205757267	0.239454857	0.456943063
E07000147	2009	0.487474577	0.574441525	0.619818382	0.44351484	0.182373728	0.219329132	0.621239853	1.756399515	0.284513891	0.445467584	0.255171394	0.317918321	0.356118281	0.734583633	0.750198886	0.243311302	0.844778677	0.534448718	0.089491873	0.909981992	0.934579476	0.986975012	1.272650998	0.452106271	0.506808087	0.361318275	0.139507531	0.871002374	0.075498235	2.271998087	0.04084685	0.262381081	0.235553006	0.92815824	0.609711439	0.230854171	1.579281025	0.535755403	0.302620653	0.083298507	0.337986525	0.127320182	0.368465282	0.696677853	0.314016226	0.222333681	0.258157585	0.465498248
E07000148	2009	0.395327637	0.524042391	0.527981143	0.395465503	0.144847727	0.162717342	0.535677006	1.839181027	0.24941473	0.384844468	0.200222488	0.243240217	0.318593842	0.723345698	0.662018463	0.209529555	0.735350195	0.510936861	0.087974233	0.759601122	0.841852982	0.784868177	1.10332997	0.354962869	0.417644862	0.315810584	0.121678298	0.701010011	0.068042674	1.92269339	0.03591047	0.228587257	0.182508942	0.821004396	0.563536756	0.191685593	1.289450498	0.41383581	0.255085159	0.101585371	0.255931407	0.099406468	0.279490373	0.532029286	0.316877835	0.180359534	0.211073661	0.443000117
E07000149	2009	0.467809933	0.575022112	0.594338727	0.436472128	0.170011085	0.198065508	0.603915994	1.678512714	0.277674306	0.431982646	0.233617473	0.29662902	0.348598877	0.73749107	0.73766257	0.233774079	0.830825295	0.549236835	0.092848226	0.873089902	0.926238412	0.927762049	1.22092278	0.416783284	0.480310091	0.358611164	0.139519281	0.830167327	0.073579038	2.18143093	0.041985996	0.254687195	0.214697044	0.9043963	0.610641096	0.215919592	1.626586091	0.50088739	0.285869665	0.090478315	0.3117306	0.114626788	0.337789626	0.650704865	0.327551509	0.209194153	0.247720695	0.473489034
E07000150	2009	0.39121924	0.524971348	0.531523688	0.396043858	0.142759901	0.164459516	0.52756923	1.74580641	0.254935868	0.386970619	0.203061061	0.24628085	0.31040637	0.748109901	0.661139742	0.214582879	0.73582565	0.512985641	0.088810382	0.78807318	0.859947189	0.803140282	1.119314187	0.363396341	0.414091153	0.32056801	0.122908167	0.715430372	0.067275794	1.955068228	0.039273995	0.225948322	0.182097454	0.827780392	0.59225708	0.19471669	1.304690012	0.420475667	0.257428099	0.116079755	0.271229815	0.099502966	0.279164361	0.53808217	0.31163978	0.181829241	0.210091483	0.442079424
E07000151	2009	0.460208552	0.578623967	0.582034595	0.418573907	0.170220015	0.185797694	0.603282422	1.602143572	0.259224166	0.413419299	0.21250622	0.279592506	0.35991746	0.712009798	0.711514346	0.21780789	0.798409726	0.546602077	0.097638025	0.822878894	0.891502964	0.85571468	1.13998997	0.382252298	0.449538901	0.341356986	0.135902103	0.779364029	0.075745638	2.026629853	0.0401419	0.245122605	0.199506925	0.895136069	0.570479115	0.204419582	1.72004736	0.460360747	0.270236528	0.086574636	0.288899513	0.10172281	0.323693642	0.614734474	0.32047865	0.205874124	0.246501725	0.478236568
E07000152	2009	0.433910422	0.552906866	0.559031951	0.418796265	0.158657785	0.178976333	0.566541887	1.648155166	0.264700195	0.404675891	0.216817267	0.271123407	0.331004914	0.735365816	0.698096748	0.220734194	0.778493302	0.536880024	0.092874611	0.819372516	0.889715569	0.853119911	1.154018913	0.383008307	0.446189132	0.34075288	0.130588374	0.773277361	0.071789286	2.048097538	0.040811049	0.241017706	0.195586621	0.875405446	0.592653428	0.202889408	1.512995234	0.456195272	0.269903934	0.101501285	0.287781178	0.105586222	0.311652471	0.599968798	0.318994483	0.194073464	0.230326918	0.457164902
E07000153	2009	0.424513129	0.545858315	0.5496613	0.415335265	0.152658908	0.175239691	0.557805708	1.707125592	0.262005851	0.406291369	0.212899979	0.264769245	0.323588931	0.736283597	0.688407779	0.219842627	0.77695541	0.53292249	0.093383883	0.814161756	0.887144714	0.849663167	1.150785294	0.379231045	0.440359652	0.337256855	0.127043101	0.757738821	0.068871438	2.031450415	0.039649489	0.237569671	0.192929983	0.854054224	0.59642747	0.199392178	1.436115536	0.447348478	0.26439441	0.103599138	0.283720356	0.104335085	0.295684301	0.576097516	0.324272378	0.189986209	0.222909946	0.456568081
E07000154	2009	0.393708815	0.514473088	0.525211807	0.383686169	0.14744304	0.160849599	0.533787386	1.62341998	0.242862762	0.377343156	0.194845972	0.238004913	0.320392552	0.719956333	0.639854038	0.20585473	0.709952952	0.502958456	0.091230432	0.750573029	0.84569812	0.76807989	1.077902455	0.34698741	0.402319401	0.306166141	0.122465658	0.690614538	0.070221325	1.852972214	0.037143935	0.225215362	0.176366892	0.826314716	0.555981068	0.193391119	1.308200226	0.397298496	0.252935984	0.106954066	0.255781092	0.096371785	0.285196536	0.513308629	0.301771319	0.184331919	0.211290083	0.444518151
E07000155	2009	0.456908788	0.570084501	0.579300419	0.41638308	0.168534002	0.188010158	0.59577823	1.571532601	0.264539064	0.419970534	0.217053571	0.284546369	0.355406723	0.723514069	0.716002495	0.228426409	0.805770879	0.543115988	0.09384391	0.83850438	0.90355327	0.873605046	1.159728368	0.389720194	0.453397937	0.347596358	0.137266287	0.787443194	0.073609742	2.04484326	0.040895073	0.246817989	0.202197492	0.895569235	0.584909122	0.20591438	1.665114056	0.465216864	0.274949766	0.083503761	0.294194149	0.105087024	0.321161793	0.58166776	0.322114773	0.205134701	0.248345603	0.478999239
E07000156	2009	0.416316796	0.536952018	0.546697658	0.405967671	0.151518528	0.177108035	0.552012868	1.701613772	0.261088772	0.402507062	0.214557313	0.261389758	0.32198006	0.742082866	0.67598194	0.219994343	0.762465539	0.522172559	0.092208153	0.809754329	0.888257249	0.854544676	1.155556649	0.384515934	0.431571893	0.328986753	0.125076967	0.749606214	0.068955249	2.021515227	0.039500008	0.235565889	0.19246898	0.858222677	0.595464793	0.201844136	1.370123445	0.443129905	0.265971696	0.100787725	0.282383793	0.106068922	0.301060628	0.571783109	0.318609766	0.192444542	0.220716969	0.455217128
E07000163	2009	0.460063375	0.557196755	0.584816702	0.41669969	0.172785753	0.201760838	0.587891443	1.746993777	0.272158663	0.426272031	0.233332355	0.300327174	0.34670393	0.725478739	0.730239634	0.239037413	0.815219741	0.51937227	0.084683686	0.867416562	0.900993556	0.927167054	1.200579007	0.419246103	0.473631158	0.351796026	0.134534367	0.816476311	0.071793086	2.138799692	0.040684365	0.248007126	0.212815046	0.892036147	0.588324488	0.213075873	1.56472514	0.499029597	0.281227886	0.080227721	0.315954133	0.117438137	0.332986302	0.598209684	0.316070554	0.205130123	0.242693869	0.462350615
E07000164	2009	0.455715158	0.555270507	0.577717162	0.417295083	0.165354839	0.195325699	0.584036631	1.66787541	0.269444456	0.419443914	0.228656696	0.290241903	0.338141953	0.718346572	0.720859128	0.230132651	0.806353356	0.530587812	0.087997477	0.856361408	0.89382005	0.905571002	1.185374008	0.410398873	0.46937266	0.350061867	0.131879672	0.809072366	0.070230384	2.128185581	0.040562163	0.246166078	0.21063599	0.881683295	0.58897254	0.209147714	1.573810259	0.491039187	0.27682297	0.082624459	0.307257426	0.11145345	0.325902554	0.623102958	0.315587748	0.201591865	0.239446418	0.461244531
E07000165	2009	0.456836153	0.562280955	0.574213748	0.417212781	0.16762691	0.188885285	0.589907433	1.636556963	0.260693651	0.418515622	0.21805029	0.284627578	0.350120655	0.705637621	0.711624567	0.225738982	0.801382862	0.533149988	0.091849845	0.834859202	0.892968702	0.884210828	1.158883261	0.392349501	0.457781256	0.343177294	0.13554116	0.780112025	0.072535714	2.062456098	0.04040979	0.245554628	0.203576979	0.88240063	0.576413505	0.20530734	1.611469496	0.470535566	0.269644144	0.082971919	0.293464578	0.105568879	0.318590132	0.590543395	0.322594364	0.201570641	0.240402964	0.467609627
E07000166	2009	0.442730491	0.547657612	0.569930364	0.402380092	0.164776974	0.187824998	0.578420935	1.621558906	0.255822029	0.405037275	0.213248072	0.277334493	0.347710157	0.710966881	0.690515214	0.222857245	0.770951913	0.515590995	0.090510253	0.822042482	0.879222066	0.859325983	1.139319344	0.387622652	0.443789616	0.328408471	0.131256655	0.769313904	0.073547619	1.984661205	0.039554323	0.242109498	0.198747843	0.87686284	0.568693167	0.205303805	1.522436612	0.454376155	0.267744365	0.087235325	0.293383474	0.105994151	0.317519884	0.568406102	0.30485956	0.201666633	0.23982549	0.455464285
E07000167	2009	0.461765433	0.558044852	0.587537485	0.418166041	0.16976913	0.201251128	0.587330119	1.704974712	0.272290237	0.421174865	0.23300234	0.298405623	0.340264465	0.719067744	0.721811042	0.233884007	0.816196965	0.526266168	0.09075434	0.87077981	0.902009151	0.931697795	1.20330112	0.415185545	0.473850831	0.348021402	0.132997357	0.808980459	0.070447861	2.136214393	0.040622925	0.248259475	0.215253445	0.882295143	0.592951652	0.212667655	1.562421277	0.496625677	0.280072367	0.077508465	0.313694663	0.116533819	0.328819357	0.628241489	0.314481163	0.205956142	0.240655904	0.456039514
E07000168	2009	0.437458807	0.533112636	0.565778496	0.40599436	0.163420764	0.194584213	0.564612179	1.725564249	0.267287274	0.408727574	0.229753162	0.285323753	0.325770385	0.716514553	0.695665559	0.227472342	0.780220799	0.502905543	0.086279812	0.839027944	0.879144718	0.899886628	1.182851112	0.407828	0.458327992	0.336516794	0.126028367	0.790183974	0.069692866	2.085735023	0.038512748	0.240511003	0.2103088	0.864614941	0.585113097	0.209740023	1.392984015	0.480539445	0.27780774	0.081807713	0.304887962	0.117075192	0.320009428	0.607238571	0.303752039	0.201169681	0.232166443	0.438580343
E07000169	2009	0.423810888	0.54235309	0.551447434	0.408201868	0.153366422	0.18013276	0.554798744	1.686742621	0.267269994	0.405372748	0.217533535	0.272698589	0.320918491	0.728420437	0.695258683	0.222193753	0.780124502	0.522676505	0.087646873	0.818828237	0.879463695	0.864693402	1.15258894	0.387749777	0.441854194	0.340131596	0.125057309	0.768056862	0.067511619	2.054816504	0.0401887	0.234082556	0.19619197	0.852872257	0.59224417	0.197878591	1.456786349	0.462055748	0.268178382	0.090053495	0.294247651	0.10712198	0.304064131	0.586444181	0.317293246	0.190451465	0.226254262	0.451081251
E07000170	2009	0.413700059	0.536844199	0.546398994	0.413072986	0.149773697	0.177701268	0.54442091	1.809761305	0.269577365	0.406963377	0.217953007	0.268731239	0.315418392	0.749164283	0.693534026	0.22626049	0.775767544	0.520624993	0.087042123	0.822502283	0.883553586	0.866114983	1.165125124	0.390414455	0.440503918	0.338021104	0.122288232	0.762379243	0.066497626	2.071801298	0.040492401	0.232937108	0.195650701	0.8495376	0.601910345	0.198225395	1.362537678	0.460344537	0.267251007	0.094464987	0.296377573	0.108412403	0.295243089	0.579399773	0.320113362	0.187296216	0.218980891	0.444823057
E07000171	2009	0.430626325	0.54488316	0.559142491	0.41473903	0.156125293	0.183728066	0.562059929	1.707705521	0.271698458	0.409103973	0.223537694	0.276680052	0.322316399	0.740743003	0.703962693	0.224848844	0.783401054	0.52747412	0.090052735	0.833614884	0.891335893	0.878878201	1.177345101	0.396377096	0.451095015	0.342601485	0.126195093	0.784870527	0.069226024	2.094990152	0.040242032	0.238932389	0.201643682	0.864697123	0.602251639	0.204234326	1.45721188	0.469603093	0.27396973	0.088867545	0.297523123	0.110282459	0.311420771	0.603626432	0.317095329	0.195409118	0.229838542	0.451772225
E07000172	2009	0.440889848	0.555045057	0.56964171	0.412541762	0.163460197	0.183704984	0.582908359	1.683043877	0.262408587	0.405408782	0.218328702	0.272112645	0.340465541	0.729708073	0.697571737	0.22016359	0.780771345	0.533318761	0.093725072	0.819835181	0.890673964	0.855476986	1.158555657	0.386778669	0.4486881	0.338218334	0.133165688	0.772674315	0.074534559	2.035567299	0.039064749	0.242593703	0.20187624	0.882180904	0.582561563	0.206959718	1.50967521	0.456524637	0.275433323	0.093245532	0.289917537	0.106954511	0.323118445	0.611324505	0.315697873	0.200598817	0.238456292	0.461972363
E07000173	2009	0.438509284	0.552981363	0.568600004	0.415904979	0.162891615	0.183494649	0.577940282	1.693549718	0.263961149	0.4106329	0.218116348	0.271460231	0.33942118	0.737795329	0.698445873	0.221045641	0.777197486	0.530960908	0.094674161	0.823850594	0.894614451	0.858818287	1.161717632	0.388660958	0.449172715	0.337215949	0.132378582	0.776299201	0.072780683	2.051760326	0.039534609	0.243794462	0.200496452	0.880849021	0.586838095	0.208350827	1.491360452	0.456361114	0.273656446	0.093805063	0.290071872	0.107301068	0.317175295	0.597617063	0.314502629	0.200394068	0.234591387	0.461497487
E07000174	2009	0.413488761	0.530329354	0.546151627	0.406317865	0.1530003	0.179182946	0.546657388	1.782010599	0.265915195	0.401898834	0.217549516	0.267000166	0.319265886	0.744435432	0.687909226	0.225003778	0.763942643	0.511271096	0.086782074	0.816019314	0.876188868	0.855837034	1.158639437	0.388125054	0.439229829	0.332986898	0.123188605	0.752324175	0.06853119	2.032219119	0.039423884	0.232674508	0.194575719	0.852165473	0.595580333	0.199396051	1.335156753	0.452201559	0.267508715	0.093828069	0.292017463	0.10888815	0.298333256	0.567217178	0.314137312	0.190331922	0.219904583	0.445134612
E07000175	2009	0.440981544	0.558923224	0.569786998	0.425111923	0.160681876	0.189132226	0.574658945	1.787921122	0.272009768	0.421379332	0.226124074	0.283611906	0.333172854	0.742825547	0.722082946	0.229610142	0.802534274	0.534433976	0.088517076	0.84909218	0.902639128	0.896638849	1.18997351	0.40379899	0.459897339	0.348715441	0.127311656	0.795390826	0.070738705	2.127984255	0.041191062	0.244744761	0.204217094	0.880737492	0.603161931	0.206653244	1.511435486	0.478904431	0.274036805	0.095899275	0.303121582	0.11142401	0.314556481	0.609354261	0.322014809	0.197292899	0.234436905	0.462192435
E07000176	2009	0.459394905	0.567405223	0.581453498	0.412370181	0.173493174	0.186183592	0.603493405	1.517069917	0.259834576	0.413422991	0.212869066	0.275056694	0.357501008	0.709176677	0.704357852	0.218660381	0.786234389	0.534818316	0.09742806	0.820386189	0.89367202	0.849122102	1.138031702	0.3778147	0.447969138	0.339093844	0.136590422	0.766240254	0.077350426	1.997586227	0.040107503	0.247912377	0.200912883	0.898763008	0.567422794	0.208572119	1.647240156	0.450045185	0.275013006	0.088322952	0.285946242	0.103636698	0.329634662	0.600747946	0.31320359	0.209603028	0.249929262	0.478253022
E07000177	2009	0.442983393	0.563259821	0.573158097	0.425417934	0.164930338	0.179892524	0.588084426	1.659747274	0.267630117	0.413665706	0.214608849	0.268966961	0.346065136	0.743490301	0.705863616	0.223623349	0.784895381	0.540356745	0.095815639	0.820015755	0.903816342	0.846106939	1.154402419	0.378571372	0.444906471	0.342372876	0.135456333	0.765585865	0.076652321	2.018287184	0.040899155	0.244895089	0.196371928	0.896154777	0.590668405	0.207217024	1.524072956	0.444988214	0.274399003	0.112005838	0.287185741	0.104903685	0.321190599	0.582336171	0.322602842	0.199626928	0.240100707	0.474340949
E07000178	2009	0.396912396	0.529026876	0.529530781	0.388896304	0.151524368	0.157002254	0.554021325	1.760705825	0.242659305	0.382416166	0.188876132	0.229023422	0.335322763	0.724807682	0.65476269	0.206330263	0.722703608	0.513454256	0.091549904	0.740422302	0.843129309	0.739281456	1.068952062	0.333126226	0.404157148	0.308825977	0.12823607	0.671223096	0.0748994	1.822319026	0.037400218	0.231663226	0.175404059	0.836465595	0.546985485	0.193263577	1.287961983	0.384889689	0.253510995	0.110323283	0.242413626	0.093375957	0.286343195	0.511526923	0.313695671	0.183628692	0.215624814	0.454715867
E07000179	2009	0.485628561	0.598090644	0.609339902	0.438423193	0.180579104	0.19791982	0.632134061	1.634126486	0.267070744	0.43964194	0.221686508	0.291996208	0.379760864	0.727862664	0.737640587	0.231747888	0.837110102	0.560479383	0.09843633	0.859436489	0.933233533	0.898557969	1.185640122	0.398192849	0.473065637	0.357278125	0.144780094	0.802247244	0.079688236	2.096264928	0.042264213	0.259484874	0.210015019	0.931719186	0.585873159	0.214588265	1.7634713	0.477073395	0.280964687	0.09514816	0.301512187	0.107082287	0.340965964	0.60702136	0.333323527	0.213269873	0.261855605	0.502252823
E07000180	2009	0.476071804	0.585891817	0.597573033	0.427705423	0.175069895	0.192065253	0.615864024	1.605078378	0.268376551	0.426213766	0.21945397	0.288869144	0.368083747	0.723304757	0.73505699	0.227208908	0.824141089	0.556776084	0.097186687	0.847171451	0.920202977	0.890798115	1.178745757	0.394405607	0.466349852	0.353742754	0.142631455	0.800056966	0.076977103	2.08001647	0.040978543	0.254219146	0.207266827	0.916467456	0.586750956	0.211910433	1.724335985	0.473419633	0.279073559	0.092194527	0.298810986	0.106569924	0.333566862	0.614296272	0.330914892	0.210683104	0.254387008	0.489273098
E07000181	2009	0.467251645	0.582629249	0.595304033	0.439113281	0.17309435	0.193835614	0.608978572	1.668344495	0.273429246	0.431731905	0.226344269	0.290709138	0.359874445	0.745921108	0.7335663	0.235397567	0.825594978	0.555643036	0.093990407	0.86048285	0.926628713	0.898162995	1.19921457	0.401750588	0.469837608	0.358659016	0.140016597	0.809284383	0.076921235	2.121996888	0.042260087	0.25541318	0.208358601	0.922625155	0.600474291	0.213320242	1.639527343	0.480848104	0.282577348	0.098913594	0.305383638	0.110212534	0.332283583	0.606450863	0.331441573	0.208160576	0.250588074	0.488604565
E07000187	2009	0.447254015	0.558457855	0.572816988	0.425578452	0.164712126	0.191462658	0.578644746	1.761657098	0.271543828	0.421536894	0.227178374	0.284983721	0.338783071	0.734803834	0.723529632	0.232593362	0.808120079	0.531540316	0.088912046	0.85245959	0.907860492	0.905296676	1.193751503	0.405659089	0.465904179	0.349817147	0.132201232	0.796404741	0.071141216	2.12270226	0.040618878	0.246615675	0.20535046	0.884208052	0.603056042	0.2090776	1.524634957	0.481738118	0.275214126	0.092575989	0.301474542	0.112641012	0.320764137	0.60580056	0.32595782	0.199991407	0.23558607	0.463027762
E07000188	2009	0.438615666	0.548198654	0.56826908	0.421032601	0.160001683	0.190014657	0.568529254	1.736359592	0.272754038	0.416059168	0.22840736	0.281850793	0.325581731	0.737524302	0.711375325	0.227313004	0.792770744	0.525766135	0.089076028	0.847285935	0.896056741	0.895596469	1.190847886	0.40535381	0.460119377	0.344697566	0.126687318	0.795202681	0.069161724	2.118650918	0.040423224	0.242241404	0.207042756	0.868845194	0.602690509	0.208069412	1.446288085	0.476813091	0.277237348	0.092312944	0.30380485	0.11294661	0.317411242	0.611167624	0.31614698	0.198500292	0.2330586	0.450767893
E07000189	2009	0.445990215	0.54932983	0.572479402	0.419251846	0.162821458	0.191555869	0.57759201	1.699882618	0.270008585	0.418354443	0.227460865	0.283779484	0.333086155	0.726379406	0.70942249	0.227200708	0.793235661	0.524363178	0.091011303	0.847862169	0.89740145	0.898855012	1.188122617	0.405907957	0.463460995	0.341893367	0.129650825	0.794544687	0.070122152	2.112041436	0.040053876	0.244304762	0.2092838	0.872325227	0.593753049	0.210572461	1.489545601	0.479994723	0.277962518	0.088888144	0.301274631	0.112263519	0.327890589	0.621669426	0.312889469	0.201955418	0.23726418	0.452077202
E07000190	2009	0.447573489	0.557364312	0.574164051	0.41679879	0.164122801	0.191239905	0.579984422	1.679514842	0.268353127	0.417829441	0.224769376	0.281837683	0.338379595	0.72684899	0.716404955	0.22568639	0.803449302	0.532792587	0.090073039	0.846894695	0.89857419	0.890294997	1.18170601	0.402463585	0.46207239	0.347046803	0.129930693	0.791143168	0.069952489	2.10019307	0.040490683	0.245666641	0.207672146	0.8768694	0.594610459	0.207261134	1.527287716	0.477229894	0.2767109	0.091106885	0.299662839	0.109885208	0.314986023	0.614951998	0.32071047	0.199939297	0.23550342	0.461675708
E07000191	2009	0.492848389	0.573325788	0.61916552	0.439908309	0.186474805	0.219572358	0.62119425	1.708662269	0.280624976	0.442964933	0.250640662	0.32210387	0.359666651	0.711022697	0.750330729	0.241870429	0.848284161	0.528692804	0.089442878	0.904110388	0.92267991	0.990195423	1.261275735	0.449924103	0.504105986	0.362813427	0.138789304	0.864312886	0.073900421	2.250945976	0.040193802	0.258834572	0.235897393	0.921401739	0.595416038	0.228755268	1.641377279	0.535095349	0.299741735	0.078919787	0.33305585	0.126855574	0.366195883	0.673605668	0.31316536	0.222942304	0.257415803	0.464150674
E07000192	2009	0.416249081	0.53619484	0.553238436	0.407736531	0.155960331	0.178413587	0.556543972	1.828393306	0.266250677	0.408334518	0.216464709	0.268021176	0.330415809	0.756474745	0.695765032	0.228852828	0.770311496	0.516485271	0.088286845	0.818675864	0.886172367	0.856285417	1.161419967	0.385411255	0.437418395	0.335535671	0.127957747	0.758867501	0.070080441	2.022928725	0.0395006	0.234612772	0.193103249	0.861516257	0.59962692	0.200954992	1.359572402	0.444031144	0.270459327	0.096758395	0.292497509	0.108101425	0.303343488	0.55584967	0.321143097	0.192294266	0.220968118	0.454577573
E07000193	2009	0.423324405	0.540112483	0.554381368	0.40921394	0.156845972	0.177811873	0.560633685	1.743272315	0.261674441	0.405959308	0.213372077	0.265617183	0.330233511	0.73700062	0.690546488	0.222146374	0.765805908	0.520290978	0.091096465	0.815069979	0.885012423	0.845306646	1.147645044	0.380480241	0.437252171	0.331974871	0.12790869	0.749848117	0.071297415	2.013112401	0.039340297	0.236978163	0.194064917	0.860367255	0.58680251	0.202570679	1.419603708	0.444947959	0.265803355	0.101715633	0.285199668	0.105156827	0.305298143	0.565544196	0.31531171	0.193157122	0.227680713	0.453835208
E07000194	2009	0.473884836	0.581661603	0.59755692	0.429957957	0.175242251	0.196884534	0.61236708	1.664686451	0.265561156	0.424610439	0.223267542	0.294099504	0.364910838	0.720135748	0.73079021	0.229084056	0.821371264	0.548191875	0.093992088	0.849703936	0.911140192	0.901731822	1.181479109	0.401928018	0.468914207	0.350427382	0.141326896	0.813164499	0.077629704	2.094717194	0.041185626	0.251705061	0.209453646	0.911752881	0.582015455	0.211337582	1.72258861	0.484474434	0.279144348	0.086924827	0.307838936	0.108894809	0.333748013	0.616972015	0.321640707	0.210101572	0.252830726	0.477819141
E07000195	2009	0.435178471	0.556198863	0.563786792	0.431168731	0.158015329	0.184241439	0.568502666	1.862125477	0.270760667	0.416614437	0.225151573	0.278804074	0.330818075	0.750653248	0.712335604	0.228786907	0.798815103	0.53685382	0.090484832	0.84404658	0.905678729	0.893344297	1.195362534	0.400092396	0.459503124	0.346477678	0.127392975	0.786773922	0.06975111	2.136821408	0.040521714	0.242665969	0.202445668	0.874078709	0.610690058	0.205886162	1.472918	0.472676886	0.271795609	0.094855771	0.29756541	0.110148846	0.308867283	0.603608398	0.327966847	0.19511602	0.227914933	0.456964334
E07000196	2009	0.467898473	0.576046407	0.592335474	0.429561201	0.167836147	0.194953404	0.603315312	1.709723387	0.273003187	0.42572373	0.229058269	0.293403663	0.34972564	0.739143523	0.734928508	0.230029838	0.820140646	0.556564432	0.094909926	0.867518811	0.921061742	0.917366047	1.210545436	0.411217559	0.475407476	0.354073641	0.139176769	0.823152208	0.073790303	2.166085755	0.0411809	0.250486085	0.21337424	0.899125244	0.609888772	0.212373982	1.660863796	0.492717654	0.283312689	0.083096368	0.306224875	0.11123555	0.331091137	0.641543775	0.328004614	0.208217825	0.247067501	0.474277071
E07000197	2009	0.445693964	0.56100377	0.574307183	0.426240101	0.163034779	0.189440303	0.582407573	1.713358377	0.271333718	0.41714547	0.226617454	0.285134891	0.339449674	0.74088379	0.713352631	0.228376668	0.802884175	0.539548342	0.091325085	0.842983929	0.903850894	0.891787517	1.188557588	0.401632576	0.462760877	0.350042704	0.131823526	0.799129707	0.071974446	2.115979029	0.04102808	0.246338902	0.206933858	0.893408306	0.598008257	0.208012698	1.533938754	0.479589313	0.278052063	0.088463869	0.304357112	0.111101421	0.321261481	0.615913479	0.323057943	0.201131101	0.237517746	0.462852326
E07000198	2009	0.470020991	0.576772935	0.597047771	0.432241068	0.17244206	0.198658667	0.60535688	1.737065539	0.272731273	0.428470378	0.231982686	0.300074089	0.355566543	0.737550546	0.737955175	0.235043421	0.830761294	0.550926669	0.094533526	0.869698795	0.923295657	0.928618582	1.217466764	0.416190555	0.477365877	0.357265736	0.139802681	0.829315661	0.074213358	2.17233635	0.041263951	0.2531787	0.214459596	0.909756475	0.606445844	0.213607377	1.670055941	0.501806624	0.283098712	0.085302832	0.312831601	0.113340111	0.335076837	0.638236041	0.3299122	0.209046804	0.247267042	0.473482049
E07000199	2009	0.415721618	0.538144187	0.542850056	0.411985889	0.149571474	0.175352157	0.546026421	1.747402959	0.266768629	0.406208655	0.213169023	0.265021016	0.316009812	0.74538213	0.693014794	0.222761848	0.777245705	0.529188146	0.089150638	0.812268685	0.882983654	0.854908337	1.152416675	0.383120725	0.435833641	0.339962433	0.120927468	0.757652337	0.066419613	2.045621862	0.040207836	0.23375928	0.191628681	0.848874241	0.601169512	0.194844979	1.409468436	0.450202144	0.263244282	0.097657984	0.2887826	0.105275105	0.288116834	0.562705022	0.327158773	0.186638429	0.219470191	0.450366135
E07000200	2009	0.46740427	0.574098945	0.595594943	0.432589159	0.170369228	0.200524738	0.600439356	1.70432613	0.277811157	0.432606094	0.234403458	0.297164998	0.347709466	0.744446662	0.739555909	0.234780247	0.829553174	0.547863835	0.092662403	0.878785094	0.925861352	0.93024	1.222801396	0.420512531	0.479098348	0.359821254	0.135178471	0.831185772	0.072636595	2.180461445	0.041731859	0.255097696	0.216768003	0.9102978	0.613305919	0.216117821	1.600122732	0.500577943	0.286725768	0.088972169	0.310990821	0.115650332	0.333763068	0.633235563	0.326593005	0.209137362	0.246255849	0.473399114
E07000201	2009	0.403791157	0.521704813	0.540083161	0.400014113	0.146212885	0.172749532	0.535119054	1.768659042	0.26169759	0.4006987	0.211188913	0.254303487	0.311606161	0.740128697	0.675075309	0.220680328	0.751020828	0.509784377	0.08754341	0.80187096	0.864031458	0.829972372	1.140530009	0.37560541	0.428265337	0.32248121	0.120414651	0.729212895	0.067102364	1.992211705	0.039290991	0.229427961	0.190032672	0.826166562	0.587180439	0.197823566	1.272322794	0.436095134	0.262793424	0.110784799	0.277033064	0.107101949	0.291852488	0.564791332	0.314447531	0.185310199	0.215223022	0.442231279
E07000202	2009	0.40685074	0.526073792	0.541132654	0.397208933	0.150417162	0.169078936	0.545044287	1.742754461	0.257978429	0.394386048	0.20629314	0.251295196	0.32069544	0.742190831	0.6714117	0.21765075	0.744218387	0.51796459	0.092226588	0.791593959	0.870756563	0.815727558	1.126953886	0.368116139	0.423265851	0.322479683	0.124658672	0.722961237	0.06951503	1.953422747	0.038443195	0.230900452	0.187676936	0.841134288	0.581288472	0.198019526	1.325010097	0.423765759	0.261120079	0.110610032	0.271228145	0.102396533	0.292806222	0.538716189	0.314745751	0.186777097	0.217008033	0.452928079
E07000203	2009	0.455595734	0.563707371	0.582189865	0.425109873	0.166523668	0.194599164	0.588490936	1.704641694	0.274064711	0.426810031	0.228688638	0.292047163	0.342949769	0.737608583	0.726562473	0.233809671	0.814307499	0.537689246	0.0909773	0.862716858	0.915297944	0.914333764	1.201165606	0.409911507	0.468093561	0.35026323	0.133462145	0.810580529	0.071339811	2.140612381	0.041727357	0.248755398	0.208377109	0.891611184	0.604336113	0.211314599	1.585186628	0.487557089	0.279640717	0.088328978	0.308688228	0.112617707	0.329104808	0.628099306	0.322212891	0.205200507	0.240483976	0.463952795
E07000204	2009	0.439574312	0.552203504	0.568672532	0.422491666	0.158745607	0.185390493	0.572308873	1.697646413	0.270913195	0.416856418	0.222554843	0.276527332	0.330376838	0.74119074	0.709511383	0.227538973	0.79329433	0.536554996	0.091905474	0.843489	0.899832473	0.881978732	1.182742573	0.39713276	0.457722141	0.343823419	0.129852381	0.786463989	0.069646993	2.100212635	0.040771192	0.243159587	0.204564784	0.874004097	0.600368776	0.207187185	1.473148565	0.469576999	0.275909854	0.098276816	0.296179319	0.109054927	0.31647455	0.600062345	0.321611291	0.198257851	0.234279821	0.459466257
E07000205	2009	0.479429427	0.578320191	0.602999551	0.434050697	0.1779831	0.203361611	0.617516046	1.673242241	0.27439468	0.434827313	0.23498908	0.2999462	0.360150173	0.730034676	0.738309295	0.233058864	0.828158298	0.542463079	0.095428454	0.876728036	0.926216796	0.930606989	1.21892714	0.419673634	0.483967793	0.356025916	0.140850404	0.831195632	0.07585958	2.168618203	0.040995189	0.257758865	0.218636052	0.919111935	0.597763106	0.220286086	1.656138788	0.499150309	0.288819724	0.08593541	0.312331145	0.115267987	0.346761587	0.651737624	0.320843518	0.215811134	0.253103657	0.476978392
E07000206	2009	0.452103661	0.551330421	0.582930552	0.427317559	0.165549612	0.198440747	0.583445899	1.733187733	0.275539574	0.425517585	0.236330286	0.290150491	0.333326921	0.738989097	0.718443421	0.230842193	0.802866623	0.525397883	0.090339082	0.868214289	0.9096031	0.922926554	1.220629704	0.418690566	0.475079062	0.348445975	0.13093683	0.811657047	0.071143844	2.162906163	0.040109342	0.248326468	0.216326528	0.882675306	0.608519709	0.216868588	1.454956509	0.490820091	0.286365472	0.093832063	0.309334867	0.117949474	0.333753297	0.63397182	0.313133702	0.206471358	0.239416052	0.454388738
E07000207	2009	0.484313858	0.579197307	0.598796266	0.404818112	0.191720837	0.190514462	0.635970806	1.433115091	0.263596742	0.427391452	0.206548932	0.274161575	0.386769243	0.713489276	0.701181401	0.22301387	0.79377122	0.53406204	0.10209318	0.819617404	0.909088277	0.833101052	1.12544916	0.368843706	0.453228955	0.343603377	0.142620189	0.751767875	0.086295492	1.921532375	0.040235228	0.25610334	0.204620824	0.935258323	0.553091875	0.214519134	1.67466827	0.424328762	0.285033287	0.09574067	0.278346484	0.102470852	0.350787848	0.569319505	0.308795759	0.218976708	0.271712403	0.509272434
E07000208	2009	0.462504938	0.569101777	0.582177253	0.409167157	0.177601575	0.186616061	0.610509437	1.477085101	0.263337496	0.415817293	0.212896075	0.270849156	0.365416834	0.717990328	0.705759581	0.222261886	0.78472707	0.537123678	0.099477751	0.820578225	0.901359673	0.843339768	1.137988961	0.374588352	0.449824194	0.336990611	0.140223739	0.763481116	0.079555917	1.97091153	0.041458148	0.250569267	0.200679884	0.916682612	0.564431754	0.21072959	1.591381163	0.439086288	0.278920899	0.091632881	0.282993125	0.103103598	0.335507351	0.584594893	0.316499621	0.214751478	0.254367191	0.489247919
E07000209	2009	0.463843476	0.582736422	0.587069934	0.426633965	0.173303277	0.185167547	0.611833725	1.656979442	0.26226959	0.417355823	0.215025241	0.274735701	0.363959112	0.725922448	0.7096387	0.222944748	0.809204631	0.554954588	0.095647827	0.820658731	0.908506111	0.853258591	1.15095343	0.378959991	0.456483029	0.351598218	0.136547072	0.771045141	0.080045803	2.028260798	0.040482691	0.250052744	0.20305895	0.910157385	0.574241958	0.207684757	1.693131401	0.45162571	0.274953072	0.10123596	0.283822894	0.103444007	0.33303979	0.593278727	0.328123461	0.20548416	0.252011753	0.496272865
E07000210	2009	0.489180611	0.59367164	0.605338918	0.448178667	0.183155175	0.202089427	0.630196535	1.621280726	0.273624176	0.440472601	0.229605503	0.303703943	0.373128858	0.719582668	0.751318667	0.237278082	0.848555912	0.555290281	0.09581041	0.868583914	0.929725107	0.923066719	1.201791842	0.407903497	0.484667803	0.363219292	0.142050333	0.814360668	0.077883406	2.141546665	0.04169888	0.259574821	0.21464243	0.932120331	0.586196191	0.216780083	1.778875566	0.493426335	0.284378571	0.086410508	0.309084402	0.110596889	0.345332738	0.62782135	0.331595716	0.2150117	0.259601104	0.495654274
E07000211	2009	0.467001982	0.57600869	0.587773905	0.418451349	0.179137901	0.184054256	0.616789859	1.547408885	0.263166692	0.419058843	0.211882167	0.271493187	0.368659284	0.724520107	0.710318107	0.220668616	0.790949977	0.543575867	0.100484551	0.819454453	0.903993805	0.835166913	1.139534236	0.373360744	0.451067927	0.341205971	0.140685543	0.765198835	0.079918877	1.985680854	0.040437124	0.251377497	0.200945288	0.915234972	0.567571306	0.210672314	1.629117023	0.4386474	0.279632324	0.100518173	0.281564396	0.102307971	0.33405046	0.583515163	0.318652778	0.210497367	0.255216515	0.490793015
E07000212	2009	0.461921466	0.573846641	0.589665061	0.416285001	0.176889454	0.186002798	0.611294623	1.661422684	0.258665506	0.416855757	0.212044862	0.275902764	0.370480649	0.720575559	0.711603545	0.224419358	0.797156567	0.536191473	0.095159346	0.815846726	0.898921839	0.84824877	1.145425247	0.377814292	0.452899265	0.338918108	0.141025197	0.757454561	0.081104615	1.990500248	0.039458266	0.248293082	0.199479571	0.909317558	0.566383937	0.209874152	1.626717915	0.446358152	0.27230184	0.097220991	0.284663286	0.103944283	0.336021595	0.58354414	0.320243856	0.207825458	0.252236029	0.489941589
E07000213	2009	0.461415017	0.566127819	0.582296436	0.412187745	0.178375186	0.182303056	0.613191092	1.531280455	0.259375915	0.405832996	0.20954743	0.266025952	0.363592195	0.719263337	0.697934384	0.214095889	0.765513811	0.537272821	0.102009519	0.801386727	0.896889892	0.823749217	1.129330542	0.367098726	0.446026875	0.332619656	0.140937322	0.76416126	0.08411085	1.955362355	0.039969389	0.249114331	0.198504513	0.911136564	0.557966938	0.212226741	1.59995369	0.433829989	0.277095937	0.098628261	0.282345376	0.102707114	0.339927498	0.609203134	0.309683709	0.21222953	0.253449673	0.478305133
E07000214	2009	0.471529822	0.577892542	0.593778175	0.417364063	0.179899811	0.18792159	0.62031682	1.511430619	0.265196814	0.417082104	0.214201361	0.277788995	0.371536932	0.724800293	0.715847511	0.224468067	0.797555536	0.549986987	0.101352478	0.827691261	0.908954816	0.848897022	1.145492943	0.378364068	0.451322648	0.342377794	0.141240165	0.77625639	0.081085512	1.997852337	0.042052421	0.253091406	0.201840612	0.92486032	0.571020376	0.211286157	1.696826272	0.446103842	0.279318673	0.093923795	0.289814218	0.103195943	0.33893475	0.598161305	0.319407582	0.215750343	0.258512389	0.495557378
E07000215	2009	0.470394442	0.581332122	0.593076245	0.423358363	0.175551171	0.191309025	0.613569147	1.591082595	0.270477508	0.42851207	0.22211549	0.285025893	0.361448631	0.735875225	0.73163315	0.227383378	0.815506859	0.552984987	0.098805494	0.854389897	0.926772312	0.88870248	1.184867456	0.39562524	0.468327939	0.350864493	0.14219457	0.801914993	0.077687144	2.088375021	0.042532338	0.255307007	0.207628694	0.91489991	0.594995389	0.21478124	1.662204185	0.470394408	0.282771344	0.093624858	0.297567529	0.107217253	0.33387527	0.624889474	0.328847833	0.212538759	0.251892347	0.488705184
E07000216	2009	0.487906254	0.599519653	0.605691707	0.452469876	0.181937818	0.20112027	0.630231048	1.664051645	0.27653218	0.446990955	0.234473414	0.300556046	0.37073792	0.734811291	0.746228528	0.237334426	0.859614368	0.560720643	0.093832884	0.877559885	0.944250293	0.926021785	1.215777768	0.409974645	0.486351025	0.373400681	0.140378034	0.821737197	0.078531493	2.171108347	0.043076906	0.260271634	0.217515292	0.927812166	0.600065932	0.218196383	1.741488615	0.495234876	0.28831454	0.099437121	0.308051444	0.11264801	0.346008326	0.619175671	0.33543515	0.212675953	0.25977496	0.505837896
E07000217	2009	0.454108151	0.568355794	0.584720097	0.407067445	0.175289109	0.179432422	0.611614911	1.568792357	0.258365904	0.413745538	0.204624554	0.259229923	0.369100282	0.732202157	0.693257788	0.217196515	0.771371542	0.537316871	0.100875942	0.805648856	0.902113466	0.811526973	1.123648951	0.362994405	0.436178164	0.332819947	0.13950797	0.739042262	0.082767099	1.928720215	0.040693089	0.2502859	0.194598605	0.914375131	0.56518409	0.210688727	1.557035199	0.42177758	0.274928605	0.112280925	0.274027346	0.100294214	0.332065706	0.571459326	0.316615707	0.20938629	0.253217787	0.489838939
E07000218	2009	0.44969132	0.568249734	0.580156211	0.424211789	0.165942828	0.189035689	0.589178334	1.732194921	0.26890455	0.42033798	0.223761437	0.28823726	0.346837695	0.745054716	0.720451707	0.227989036	0.807233685	0.543959561	0.093042828	0.846503247	0.905453254	0.891374089	1.18999858	0.400711681	0.46108987	0.350457902	0.135325024	0.802477566	0.073816919	2.109021392	0.040784671	0.247287659	0.205726974	0.89606476	0.600038041	0.208781684	1.577343484	0.476322721	0.276872693	0.090627584	0.299600787	0.109824164	0.323915937	0.608775716	0.32646501	0.202616657	0.240043783	0.468162393
E07000219	2009	0.421870492	0.537465435	0.550470577	0.405925362	0.155898442	0.177405107	0.557320507	1.717253159	0.262969454	0.402836797	0.214467622	0.264693092	0.325324116	0.73671999	0.68856517	0.219776107	0.764018799	0.520652034	0.091182749	0.807518168	0.880240946	0.845394078	1.145936404	0.380712191	0.435997276	0.332001676	0.125812299	0.759199079	0.071041185	2.012059635	0.039200896	0.23588235	0.193692753	0.856988732	0.589265238	0.200875601	1.410864186	0.445204896	0.268081393	0.099035139	0.28570603	0.106337768	0.304655618	0.571881293	0.314260752	0.193417115	0.224715969	0.45087055
E07000220	2009	0.4285012	0.538007196	0.560488759	0.40442639	0.164083233	0.179027604	0.575678008	1.620727985	0.260825942	0.400020041	0.212225661	0.261254189	0.338820478	0.7305385	0.682235078	0.218733075	0.747444062	0.511598162	0.095001278	0.798956423	0.884801735	0.827843601	1.12921474	0.372216536	0.431847409	0.327007503	0.132658916	0.743450962	0.078294385	1.938673332	0.039519809	0.240080917	0.194528201	0.885709225	0.56995435	0.208026877	1.404881011	0.428902501	0.273013252	0.101932732	0.285123861	0.105925055	0.326382452	0.569061934	0.304177327	0.200200038	0.23630579	0.456970962
E07000221	2009	0.493592866	0.597794628	0.619283068	0.436298821	0.182514604	0.207013355	0.636603223	1.644479799	0.271517541	0.439975611	0.2317025	0.304356155	0.377437464	0.72289872	0.748648225	0.235193625	0.849795459	0.556773858	0.095191613	0.879138273	0.932405479	0.93312284	1.211919481	0.418490646	0.483934318	0.361946496	0.14466611	0.831643981	0.078093868	2.151761828	0.041327918	0.25904959	0.219564131	0.934076088	0.591188243	0.21839418	1.800975866	0.503282306	0.288567189	0.082850281	0.313853247	0.113273584	0.348732928	0.637625121	0.329364878	0.218040868	0.263224886	0.497215272
E07000222	2009	0.431542999	0.541645319	0.559898305	0.39256903	0.166508894	0.17696675	0.582959456	1.582967721	0.252973426	0.395741571	0.205771585	0.259339033	0.34791473	0.714619521	0.672057156	0.215126533	0.746716879	0.515545588	0.095154961	0.785750994	0.87082346	0.808869076	1.111781867	0.363851244	0.429957741	0.321156718	0.132486277	0.729802037	0.077263298	1.911262571	0.038629297	0.240057073	0.193766832	0.878648401	0.551605594	0.205401699	1.4515943	0.422884745	0.270299109	0.088260199	0.274346489	0.102055233	0.321468344	0.566439322	0.306033564	0.202789464	0.238803019	0.461339035
E07000223	2009	0.458474715	0.565953374	0.594277833	0.426974748	0.166358043	0.195434485	0.597764369	1.717704153	0.278630122	0.432082295	0.234800911	0.288082459	0.342759705	0.757880878	0.727609269	0.231596745	0.806039189	0.538756306	0.097403399	0.876913168	0.935628563	0.920417109	1.230069937	0.41595196	0.477325536	0.345739901	0.135608491	0.805876801	0.073095047	2.164309797	0.041335732	0.252683462	0.21696787	0.899037992	0.618297939	0.221819378	1.457530325	0.484911365	0.290842772	0.093041886	0.306129266	0.116215988	0.339486556	0.630520513	0.322465055	0.210945135	0.247302667	0.469735927
E07000224	2009	0.476294264	0.570970835	0.607457889	0.437195147	0.178183534	0.209928122	0.612712504	1.773422604	0.284921068	0.443785239	0.2469832	0.306291497	0.353119588	0.750163975	0.745581342	0.242553979	0.835510961	0.534541208	0.091693033	0.900027241	0.940453991	0.964643288	1.259212537	0.436513422	0.497612062	0.358575551	0.137527405	0.836887626	0.07491601	2.232013872	0.041718884	0.258838503	0.226805847	0.923820025	0.613263884	0.227884954	1.513422213	0.512676761	0.297294667	0.091175475	0.324122839	0.123526516	0.357362596	0.656596348	0.322695789	0.217621941	0.251494738	0.471650391
E07000225	2009	0.485281171	0.581584136	0.610895184	0.437092609	0.179199024	0.208846573	0.620269968	1.693965818	0.280521758	0.443076274	0.24067755	0.305524161	0.359888871	0.733937498	0.753549508	0.238029213	0.842198737	0.545452725	0.093211352	0.892638222	0.935167027	0.953307886	1.241021356	0.429631378	0.494212778	0.359630082	0.138559093	0.83832173	0.074886575	2.214818475	0.04169878	0.259320284	0.224899496	0.920534939	0.604839028	0.223262311	1.627478034	0.510914367	0.294145212	0.083727489	0.318940592	0.118615199	0.351901659	0.65580609	0.323395426	0.217446477	0.256495754	0.4805253
E07000226	2009	0.400642558	0.521339003	0.543146028	0.380824137	0.158799547	0.164187664	0.559840885	1.575720888	0.250198106	0.383529002	0.197707314	0.230718895	0.333726387	0.75159503	0.642575757	0.209447239	0.697021389	0.500859637	0.097922969	0.756147792	0.867046032	0.752326466	1.081668279	0.344745617	0.400214468	0.303007925	0.128917406	0.68876433	0.080200784	1.808335996	0.038228591	0.233622973	0.178856449	0.867991308	0.55431795	0.205829792	1.250527401	0.381508523	0.266392559	0.120976964	0.259216214	0.098915013	0.315480432	0.51912012	0.292209169	0.195225505	0.224713409	0.456505215
E07000227	2009	0.488193347	0.598235753	0.613753438	0.448647581	0.180576715	0.202914821	0.628752763	1.661256722	0.278233965	0.445215596	0.231565329	0.301825243	0.37149372	0.739113734	0.754806496	0.237989494	0.849176789	0.561695246	0.095955564	0.880482454	0.945594205	0.92961029	1.219176316	0.412928537	0.485963913	0.368216584	0.141745177	0.825374062	0.079362995	2.171715405	0.042717089	0.261355883	0.216838288	0.939469693	0.604455487	0.21832806	1.753757757	0.497307734	0.288812988	0.090872261	0.311285647	0.113199045	0.340786383	0.613780131	0.336571008	0.2144897	0.263632221	0.50221837
E07000228	2009	0.47950741	0.591802231	0.603242465	0.434446659	0.17832482	0.195672076	0.622533653	1.655097619	0.270557583	0.437959379	0.223419038	0.290700946	0.371402064	0.738700761	0.740792403	0.232592943	0.837872427	0.559756571	0.097258459	0.862625363	0.930565619	0.89857479	1.193302567	0.399885572	0.473501023	0.360178027	0.14285225	0.805530601	0.077071878	2.109618407	0.041617278	0.258660161	0.209767019	0.925279789	0.594803636	0.213905951	1.715329525	0.476940407	0.282470732	0.096586639	0.298492961	0.107942232	0.333731943	0.603913699	0.334816775	0.211160625	0.25551037	0.498620233
E07000229	2009	0.454223892	0.567809327	0.585129008	0.43479893	0.167911348	0.191947094	0.594701739	1.767538315	0.274739197	0.429200701	0.229600652	0.283757045	0.346550516	0.756246456	0.723146733	0.231397474	0.813646037	0.542342541	0.095965116	0.858474044	0.929657871	0.90690353	1.215739968	0.407288297	0.471358671	0.351587333	0.13411111	0.792052538	0.073961744	2.140980014	0.041218589	0.252305636	0.210464606	0.902097428	0.608952388	0.216639367	1.475640541	0.478482366	0.2842754	0.101270724	0.300542869	0.113907704	0.327692483	0.615167539	0.329790048	0.204950003	0.240412783	0.477264736
E07000234	2009	0.468043522	0.573388749	0.589813056	0.432088288	0.172713751	0.19433015	0.604337599	1.626987919	0.27051022	0.42504032	0.225150554	0.28874666	0.355018341	0.724561194	0.729336625	0.228917048	0.812031414	0.54402846	0.096094124	0.853739147	0.915667048	0.902648394	1.182353045	0.400626918	0.468875664	0.350972108	0.138229985	0.803126808	0.075730935	2.099410205	0.041753448	0.249889648	0.209168281	0.906920507	0.587848766	0.21221912	1.654298133	0.477314969	0.28001025	0.087329763	0.305504755	0.109314979	0.336065909	0.614942439	0.322529823	0.208852619	0.250144026	0.475853189
E07000235	2009	0.480108053	0.571826466	0.604704384	0.424079203	0.17562352	0.208260732	0.606781013	1.652497806	0.277670704	0.434023341	0.236847511	0.306121038	0.355105752	0.721942644	0.742177627	0.236402934	0.829026496	0.537664698	0.091595051	0.884199454	0.9188409	0.948253455	1.222618079	0.426905507	0.485094755	0.358326921	0.138047252	0.835158353	0.073642372	2.182306541	0.041318931	0.25541583	0.22407179	0.910881808	0.59860166	0.21766498	1.646758835	0.507483994	0.291612098	0.07561054	0.320648419	0.117981885	0.341750385	0.636472843	0.321307967	0.215155834	0.258006033	0.472195489
E07000236	2009	0.415010196	0.540406705	0.547705249	0.415576023	0.149129153	0.174804442	0.545210682	1.792590483	0.265003258	0.405253526	0.213535811	0.264390606	0.319212297	0.753441945	0.691667957	0.223921403	0.779018313	0.534391905	0.088993481	0.821469979	0.885379027	0.851400284	1.163072878	0.386442152	0.439474335	0.339511732	0.122489829	0.765363479	0.065673838	2.046654521	0.040155368	0.234922484	0.191753868	0.85194923	0.603955641	0.196751984	1.394726862	0.452272369	0.264368466	0.109801834	0.285961017	0.105187498	0.284968688	0.548863495	0.327423419	0.185791411	0.218808915	0.457535843
E07000237	2009	0.419514817	0.543376965	0.547789748	0.41651887	0.151653086	0.171324025	0.552663011	1.790739193	0.260353279	0.403063085	0.208616377	0.259570568	0.325338698	0.738982824	0.693842438	0.219871375	0.772710964	0.534277407	0.090861137	0.804860833	0.879839492	0.833772527	1.142414657	0.374261104	0.435438448	0.335553939	0.125221826	0.74277679	0.068365857	2.019843406	0.039219636	0.234444449	0.19025952	0.848058467	0.590034826	0.196927703	1.428051915	0.440848883	0.260470062	0.106938433	0.278189076	0.101789258	0.292168678	0.554876588	0.327229969	0.186069602	0.222581124	0.457717372
E07000238	2009	0.467094705	0.572387287	0.592856736	0.431888853	0.169447478	0.197830247	0.600120073	1.692541806	0.27303662	0.429877612	0.229126496	0.296902737	0.351338522	0.72966126	0.735050062	0.233627065	0.826474138	0.546015086	0.093002838	0.8708451	0.918422422	0.928903896	1.210962805	0.41338828	0.475840214	0.354526535	0.137749226	0.818825311	0.072441765	2.159180822	0.040975512	0.249845875	0.213177481	0.896323616	0.604163366	0.212304731	1.658073957	0.495148695	0.281856483	0.081970827	0.310763959	0.111937336	0.332300708	0.628702324	0.327411133	0.20769051	0.246084	0.470908179
E07000239	2009	0.445936951	0.554712443	0.57845257	0.423662733	0.164494571	0.195093868	0.580720451	1.784958979	0.275319539	0.422346639	0.232077852	0.290719648	0.337895692	0.749015911	0.714930633	0.232251829	0.806343553	0.529360054	0.089613131	0.855570692	0.908765618	0.912941019	1.209459081	0.414527948	0.467828589	0.350299005	0.130826177	0.807905207	0.070604378	2.136392269	0.040539075	0.246211405	0.211146233	0.8903053	0.605922487	0.211288735	1.462051215	0.488538434	0.28256077	0.089738686	0.309777633	0.116313104	0.324552886	0.617419266	0.322859411	0.202339688	0.236660769	0.457316266
E07000240	2009	0.467673368	0.569255903	0.579089104	0.415504149	0.177132567	0.182978388	0.612154014	1.544645927	0.260459131	0.423211126	0.203341764	0.26669201	0.369815561	0.712132371	0.70329389	0.222303714	0.793092136	0.535083152	0.096445931	0.808434202	0.889654887	0.829230374	1.113016307	0.365390412	0.449852793	0.346646586	0.138081713	0.744796538	0.079363701	1.948414001	0.039961777	0.248324401	0.198721482	0.898004658	0.551007461	0.204388163	1.713765079	0.429619121	0.272000007	0.096774505	0.274151749	0.098916213	0.331437815	0.551101698	0.3152588	0.203369803	0.253768727	0.498635173
E07000241	2009	0.428950369	0.542464331	0.54575336	0.399953341	0.16093644	0.170549327	0.5672278	1.643512918	0.249965362	0.394217323	0.201240536	0.251223862	0.336809451	0.707579637	0.677944932	0.214374762	0.750503599	0.522470942	0.091861976	0.77334981	0.862371723	0.793533736	1.093124688	0.354062285	0.42869068	0.325654405	0.130529898	0.722403302	0.075628328	1.913434139	0.038807702	0.237450758	0.184719986	0.852518646	0.555256061	0.197726784	1.494877998	0.420793506	0.256704094	0.106921961	0.267208054	0.097195524	0.305899198	0.552987817	0.312286009	0.193153769	0.228721697	0.465922569
E07000242	2009	0.466107214	0.588666751	0.587648592	0.43109844	0.174351308	0.18585322	0.614970787	1.605711755	0.264854978	0.424403971	0.215055629	0.281543429	0.366357087	0.725941324	0.721551183	0.224086866	0.818477146	0.562265653	0.097248971	0.831222297	0.917317826	0.865176866	1.15630227	0.380734129	0.454675636	0.355522707	0.137831826	0.77891922	0.0784799	2.052062659	0.041209247	0.25121896	0.202141511	0.913665395	0.58312117	0.206494288	1.737364445	0.457265738	0.274691982	0.095119242	0.285855572	0.102364773	0.326911213	0.590966544	0.335124594	0.206118248	0.252854405	0.499549509
E07000243	2009	0.42141932	0.545088256	0.547087408	0.412708186	0.155875022	0.170859263	0.558424443	1.746299842	0.258687597	0.401945233	0.20500524	0.256577261	0.332593416	0.739075581	0.693725072	0.220587498	0.764992079	0.527077302	0.090982562	0.800830115	0.880513171	0.825376939	1.128595471	0.369025229	0.43142077	0.33282908	0.127999417	0.732766637	0.072084236	1.98110919	0.039433146	0.235346342	0.186605227	0.856880441	0.584241516	0.197042218	1.447634462	0.430921917	0.258507494	0.111015513	0.277858749	0.100033113	0.291608539	0.533710716	0.322628616	0.188179812	0.224665662	0.4634704
E08000001	2009	0.390634715	0.499962319	0.522757443	0.369164758	0.153047758	0.165255373	0.534750674	1.582962091	0.247988144	0.374852786	0.198296521	0.23618471	0.310882842	0.709229263	0.635348071	0.208746494	0.689757698	0.472793536	0.09187727	0.754864853	0.841471517	0.768075381	1.066269224	0.347938045	0.398773994	0.299890416	0.12255855	0.675243842	0.076504032	1.80182354	0.03731577	0.224622457	0.180943468	0.827656287	0.549056946	0.198603769	1.189799535	0.390865875	0.258016298	0.104104102	0.264127482	0.100210209	0.303899516	0.528743613	0.282627705	0.188328542	0.217588234	0.421413881
E08000002	2009	0.414483237	0.526534016	0.539158071	0.392831449	0.156216324	0.172613185	0.550407069	1.628606064	0.257101012	0.391815335	0.206369521	0.257397562	0.322852933	0.714917733	0.672994101	0.215464283	0.741709001	0.503952836	0.0899493	0.783620148	0.860198817	0.814918205	1.108925667	0.366000173	0.424520052	0.324147749	0.126358401	0.728745926	0.071952379	1.925938079	0.038527169	0.230955219	0.188547317	0.84590606	0.568075255	0.197368706	1.363712415	0.426467043	0.261658935	0.097397341	0.277769186	0.102890774	0.301083719	0.542312772	0.306064107	0.190065108	0.223209454	0.442507795
E08000003	2009	0.324764949	0.437125377	0.459997028	0.314263622	0.137713108	0.13486199	0.484386973	1.535778252	0.218017014	0.323160926	0.164406217	0.184165645	0.289753631	0.674803674	0.543739438	0.181718757	0.57646874	0.41425422	0.085583216	0.626381345	0.736352412	0.612152069	0.915832489	0.283904301	0.327628935	0.244416936	0.113774269	0.539025559	0.076897943	1.460036585	0.032814792	0.198146455	0.14865359	0.756563771	0.470530774	0.180284771	0.891481664	0.296072463	0.229182339	0.109628277	0.208763195	0.085739792	0.277561905	0.420437374	0.249578925	0.16408566	0.187993539	0.38849043
E08000004	2009	0.378096516	0.480600874	0.507823443	0.352962362	0.15191324	0.160176068	0.522973103	1.52951991	0.24053462	0.36259684	0.191464525	0.225277765	0.304952516	0.694944659	0.612500898	0.203111142	0.656835028	0.449361905	0.09090495	0.726632589	0.819171617	0.73252779	1.02583443	0.334779701	0.382401627	0.284212296	0.120606513	0.640953228	0.079008583	1.703602509	0.035848009	0.21823498	0.174692182	0.813402836	0.528998106	0.195374551	1.107622804	0.366382523	0.252173966	0.10764616	0.254787427	0.097450967	0.305486278	0.499554201	0.266760939	0.184500886	0.213391163	0.408062639
E08000005	2009	0.386932215	0.492551469	0.512819862	0.36528591	0.152687947	0.162487581	0.525733235	1.594926987	0.246281351	0.369840747	0.196435188	0.234461713	0.307390116	0.699446803	0.629427077	0.206827181	0.684857693	0.466765498	0.089882096	0.739605225	0.831345956	0.761706292	1.050800992	0.344029461	0.393498267	0.296557	0.121745834	0.671961518	0.076895887	1.776811454	0.03692362	0.22105125	0.176539016	0.818590833	0.543055717	0.194767127	1.188607363	0.385083917	0.251838597	0.10562355	0.26261545	0.099249749	0.301780325	0.514544912	0.282449996	0.183838598	0.211813043	0.417882819
E08000006	2009	0.375652468	0.493556653	0.506726097	0.378809831	0.141268169	0.160493493	0.510372324	1.771785585	0.248063093	0.375304962	0.198126901	0.236596033	0.302056559	0.716140731	0.634359716	0.2081975	0.703051177	0.477646121	0.083743143	0.74125694	0.822981456	0.770366973	1.073677104	0.350157593	0.40027772	0.304947859	0.116397993	0.674917311	0.066733055	1.854710304	0.036371025	0.217893315	0.175997151	0.798662168	0.552333349	0.188178936	1.164316324	0.400098742	0.250049624	0.104029863	0.259835143	0.100875297	0.275384499	0.506128628	0.298430735	0.174516276	0.201166734	0.423935669
E08000007	2009	0.430721611	0.539669474	0.556714185	0.403214945	0.162708231	0.179600507	0.56915013	1.63837748	0.260008161	0.402979259	0.21168385	0.265763507	0.333940282	0.716096173	0.689532099	0.219366659	0.758571905	0.511690919	0.091347228	0.807884855	0.874821795	0.835033464	1.128259362	0.376713045	0.437686179	0.329141662	0.128948466	0.743490146	0.072959303	1.97606265	0.038855789	0.23726149	0.196002677	0.861704845	0.570131083	0.203586204	1.427901509	0.437610771	0.269604042	0.093890742	0.282827133	0.104769539	0.311071021	0.566924671	0.306227344	0.196924329	0.233608496	0.452434946
E08000008	2009	0.400833111	0.520133006	0.531679436	0.396067478	0.1501914	0.169415045	0.537851957	1.757475535	0.255683779	0.389847196	0.207206472	0.252481561	0.314491293	0.731653532	0.664127232	0.215482204	0.735289896	0.500892465	0.089200538	0.785167156	0.863104629	0.813239038	1.118568563	0.368557508	0.421036935	0.32038769	0.122054305	0.716636481	0.070592054	1.942997909	0.038218204	0.228263024	0.187038695	0.837400858	0.579475269	0.197118649	1.283271705	0.424374282	0.260130757	0.103271663	0.273997866	0.103505352	0.291669937	0.544869599	0.305943827	0.184758392	0.214916652	0.436181276
E08000009	2009	0.423591603	0.531554195	0.546842569	0.39486635	0.162393397	0.173483654	0.566090742	1.566624212	0.255032967	0.394906478	0.204365186	0.254391315	0.333628746	0.711382972	0.670615942	0.214072566	0.739832097	0.505541655	0.093287203	0.784482813	0.866189371	0.805552126	1.100091838	0.360488609	0.423613601	0.321374637	0.129436172	0.718295193	0.074780215	1.899555773	0.039245317	0.235079478	0.189598625	0.858278813	0.557696627	0.201468549	1.391639862	0.416117839	0.265120422	0.099392717	0.273549626	0.101069916	0.310936817	0.5457276	0.303636008	0.195209255	0.231771793	0.454755166
E08000010	2009	0.413446634	0.534202194	0.541379658	0.41011405	0.14950516	0.174771092	0.541913953	1.783404557	0.262968849	0.400457526	0.213494341	0.266118759	0.316171783	0.739359881	0.686724037	0.221700456	0.76864091	0.520911298	0.08668586	0.810123027	0.873238812	0.848060438	1.147790973	0.382572391	0.435846189	0.336362676	0.122310776	0.754562086	0.066678823	2.035937972	0.039414707	0.231705625	0.191637721	0.84206523	0.59470999	0.195557142	1.395530383	0.450887159	0.262005518	0.098893189	0.285978962	0.105656039	0.288317342	0.56192094	0.319349305	0.185389141	0.217979073	0.446106415
E08000011	2009	0.404435452	0.52264813	0.530930514	0.407984765	0.146229319	0.171212096	0.527095012	1.812150906	0.26776482	0.395315137	0.211828513	0.261663587	0.307150666	0.739571188	0.6812721	0.222549287	0.75967772	0.510625622	0.085162519	0.80448808	0.867342165	0.843171058	1.140088361	0.379106388	0.433810507	0.332867385	0.118716421	0.738818719	0.064589491	2.02503122	0.039494486	0.226374957	0.188744542	0.823545131	0.593582126	0.192627444	1.295244612	0.443958752	0.259997039	0.097976013	0.287479881	0.105434563	0.28084497	0.54115927	0.316852678	0.180715253	0.210334144	0.439896702
E08000012	2009	0.379048364	0.49756911	0.507896094	0.378345113	0.143740975	0.161141466	0.513773047	1.81083883	0.24909194	0.369554243	0.198280146	0.239391108	0.303501494	0.715144894	0.640583525	0.209577263	0.706696182	0.4822664	0.083163998	0.744045284	0.823682443	0.772724447	1.073002601	0.349382447	0.403628113	0.307659977	0.117876537	0.67845711	0.068212528	1.861902931	0.036197472	0.218334569	0.178525453	0.801005582	0.550818192	0.187123696	1.183306337	0.40462599	0.249683573	0.094240257	0.262147701	0.100662363	0.274848969	0.513596015	0.301093403	0.175214923	0.202559982	0.422741324
E08000013	2009	0.415421901	0.530266977	0.542692714	0.410795439	0.150893718	0.178377389	0.544558772	1.772574663	0.266468928	0.401280825	0.218628135	0.267503579	0.313684992	0.73502974	0.68770159	0.220244411	0.765863358	0.514857413	0.086729583	0.814124845	0.87555766	0.858414297	1.155362662	0.387557966	0.44027016	0.335836263	0.122164228	0.758936932	0.067378214	2.050482277	0.039051701	0.233008616	0.195027571	0.843294495	0.593177484	0.199251344	1.365114606	0.455806103	0.266948832	0.094309604	0.29035458	0.108363899	0.298159998	0.580703529	0.313819632	0.188430493	0.220135783	0.440441644
E08000014	2009	0.43509743	0.542054061	0.56157809	0.416766632	0.158053458	0.186666815	0.563240868	1.708270256	0.270753892	0.410148774	0.224233794	0.279759603	0.324690427	0.728438005	0.705207937	0.225186197	0.788533386	0.52565	0.089287254	0.840391206	0.889431065	0.890015465	1.181305712	0.399784298	0.458649022	0.341011832	0.126177507	0.782144722	0.067853515	2.100697365	0.039642595	0.239109521	0.205273653	0.859605944	0.596744898	0.205240004	1.42677789	0.471875388	0.274229667	0.08677174	0.297161401	0.111071357	0.31042763	0.595296255	0.318738553	0.196549635	0.22898071	0.449365109
E08000015	2009	0.428120122	0.537671889	0.550739501	0.413173637	0.157243832	0.183239927	0.555500029	1.743181364	0.267855546	0.405840234	0.220910338	0.273920342	0.323383188	0.72713812	0.695200673	0.223135515	0.778140499	0.51540579	0.086315591	0.822101784	0.881222635	0.869739881	1.161187293	0.392108217	0.450102347	0.340410673	0.124932948	0.767627534	0.068215261	2.061170889	0.039258474	0.237769564	0.199345142	0.857274154	0.588372342	0.202209523	1.403155116	0.462199895	0.270078478	0.090909631	0.292001307	0.110097517	0.303689894	0.580331198	0.315567213	0.192508166	0.225274092	0.44717895
E08000016	2009	0.409720134	0.526108966	0.535585034	0.407763774	0.149599173	0.176243724	0.535674128	1.785318186	0.263272113	0.398222825	0.215820597	0.267437489	0.311960828	0.729752721	0.682727177	0.221916894	0.763974211	0.509578667	0.08404057	0.804918204	0.864283652	0.852727964	1.144171064	0.383649419	0.436466249	0.335228121	0.119983409	0.749757972	0.06605496	2.035493873	0.039164527	0.229164246	0.191512823	0.833286537	0.589372181	0.194731782	1.357559607	0.45331389	0.260807361	0.095245241	0.28858031	0.107475342	0.290026253	0.561275404	0.315135997	0.184391082	0.214368001	0.437664591
E08000017	2009	0.39827838	0.511205743	0.527438554	0.392909556	0.146562654	0.1720076	0.527088182	1.74676162	0.258762889	0.389400624	0.211455181	0.256577714	0.304658579	0.723794734	0.662347773	0.217030214	0.737001338	0.493358737	0.084356985	0.787874342	0.850034751	0.826724305	1.123114797	0.375353102	0.424021072	0.322360464	0.119707513	0.726705758	0.066691687	1.970105089	0.038031313	0.22455306	0.189026925	0.819703269	0.579432343	0.19430779	1.270430376	0.436319511	0.259603581	0.097851681	0.28089565	0.105622122	0.291711062	0.550602781	0.304827479	0.182765034	0.211299946	0.428141528
E08000018	2009	0.402990208	0.512484187	0.530761654	0.389971353	0.149432307	0.173569585	0.532606137	1.699897829	0.257985573	0.390106611	0.210683766	0.25736068	0.308281539	0.719178185	0.664536247	0.216646267	0.736142751	0.492410516	0.085811747	0.78886398	0.851277043	0.826640214	1.118167457	0.37495501	0.42445423	0.320692585	0.120225342	0.72819923	0.068026744	1.956137806	0.038234326	0.225299406	0.189360723	0.824066746	0.573463996	0.195520006	1.29171658	0.434145348	0.260703119	0.095613643	0.282483797	0.105260568	0.296399338	0.551104543	0.300103758	0.184856413	0.216042279	0.42833069
E08000019	2009	0.375110966	0.483985669	0.502045449	0.364438343	0.143505131	0.159012957	0.511758517	1.646028187	0.240819549	0.364609381	0.19381516	0.23155041	0.299987662	0.692373283	0.618606205	0.203061287	0.68079936	0.464763288	0.083975838	0.727819297	0.805863528	0.74847571	1.041358289	0.339253897	0.392431324	0.293965145	0.117561565	0.657494576	0.069033325	1.784149702	0.035972222	0.21589046	0.174850302	0.791474049	0.531446685	0.188281953	1.166202394	0.386716898	0.246666265	0.095586202	0.253837267	0.097324297	0.284958982	0.511413364	0.284312867	0.177460638	0.203830629	0.41464688
E08000021	2009	0.360554742	0.472713184	0.486681893	0.346847279	0.140713671	0.152298067	0.498319064	1.624847075	0.238272182	0.347838953	0.18638405	0.223421132	0.29130509	0.680847777	0.60501737	0.19815057	0.660033153	0.453133979	0.083649991	0.703931565	0.785420951	0.724606553	1.013476193	0.325657867	0.38055745	0.285025961	0.115081364	0.628948068	0.069040085	1.716856768	0.035167046	0.209054482	0.171178905	0.77868284	0.517149451	0.183978144	1.098450937	0.370675308	0.241247949	0.088365762	0.244159177	0.094685697	0.277086467	0.491133793	0.279986409	0.173050329	0.199075883	0.404401787
E08000022	2009	0.425940548	0.547275777	0.556729976	0.418519676	0.155299951	0.180953273	0.559980625	1.768874568	0.268354076	0.409027468	0.220866356	0.270354409	0.323873624	0.74569413	0.700968178	0.224042067	0.782651029	0.530927529	0.089822634	0.83122009	0.89750187	0.868479152	1.176406834	0.392483136	0.450386586	0.341405506	0.125567047	0.770648814	0.069796322	2.080248093	0.040259643	0.240526555	0.199983639	0.867705519	0.60378005	0.204875863	1.389765933	0.461113156	0.272207604	0.098809698	0.28972385	0.109490472	0.303051127	0.57883052	0.324156663	0.193442342	0.226500566	0.455308983
E08000023	2009	0.414246057	0.527332242	0.544080546	0.40468078	0.153219044	0.178998529	0.546175057	1.799332955	0.266214648	0.399400581	0.218811783	0.266744259	0.315811949	0.739729815	0.684435325	0.220709277	0.760568642	0.50829382	0.087056374	0.812368085	0.876561649	0.85644966	1.15848817	0.387879022	0.442160584	0.333010461	0.122562566	0.75284656	0.068814516	2.041002261	0.038288316	0.23163574	0.196713198	0.847510603	0.591219829	0.201331653	1.317215919	0.452960842	0.269971793	0.091964944	0.289759695	0.109808075	0.299435933	0.567399973	0.311767167	0.188875774	0.219848107	0.439248138
E08000024	2009	0.4085536	0.53010213	0.541192324	0.407478942	0.149743204	0.177025728	0.539654114	1.835481145	0.265672178	0.399141576	0.217676914	0.264593132	0.312376397	0.744611088	0.683949605	0.220967431	0.76296857	0.513045145	0.086147946	0.813709925	0.874432997	0.852183573	1.157677079	0.38715577	0.438091546	0.332587729	0.120246081	0.752860437	0.067405083	2.048076715	0.039292667	0.231566511	0.194686103	0.842513114	0.595720488	0.198978895	1.311667224	0.452806349	0.267066053	0.094503779	0.288362888	0.108554769	0.293707245	0.569578592	0.314127623	0.186773448	0.217025478	0.439389707
E08000025	2009	0.346794052	0.444476342	0.488278213	0.316464184	0.153149742	0.147816489	0.511974477	1.355667937	0.227023314	0.33276747	0.176650485	0.192014819	0.298958306	0.686486745	0.548465769	0.187795522	0.571379282	0.407496917	0.093352599	0.662297194	0.770811603	0.641020374	0.946422944	0.299897429	0.34374095	0.248144127	0.120823358	0.567363591	0.088863873	1.474345131	0.034020978	0.209129943	0.160184585	0.798360409	0.479706165	0.197531949	0.888961215	0.303589229	0.248127365	0.116026873	0.227785931	0.091631333	0.317093057	0.453980218	0.234319272	0.18447478	0.205051795	0.394172911
E08000026	2009	0.375655938	0.482051218	0.510464741	0.348198557	0.151480173	0.15783041	0.529788191	1.522393718	0.238981231	0.35936522	0.188787782	0.219943864	0.309252496	0.702772249	0.606274648	0.199637042	0.647902234	0.45473895	0.092142507	0.71696544	0.815648691	0.716877025	1.023090008	0.327900651	0.381056689	0.281184413	0.121198461	0.636394009	0.079135353	1.687394305	0.03576508	0.21946893	0.173888388	0.813515	0.519767309	0.197723454	1.09138563	0.358550187	0.255201931	0.105003331	0.247672931	0.096389876	0.304986352	0.499648302	0.268346722	0.187409643	0.213767178	0.414767939
E08000027	2009	0.417870468	0.527709184	0.550854169	0.400327511	0.155956512	0.179472949	0.556488662	1.700401249	0.264209748	0.40246138	0.215439235	0.263489426	0.322169222	0.735994555	0.680864808	0.221082079	0.751498407	0.505938776	0.090332772	0.81000338	0.87852179	0.847223464	1.143692635	0.382704752	0.436721704	0.326789144	0.124977772	0.747188717	0.071111036	1.998051156	0.039085629	0.233722797	0.19586917	0.851445246	0.58108666	0.20434254	1.347275649	0.441537528	0.271150929	0.096466182	0.28861746	0.107686471	0.312172075	0.577758483	0.304959366	0.194239771	0.225172562	0.445347537
E08000028	2009	0.366001124	0.476121755	0.51555155	0.358683602	0.151995755	0.161342472	0.52304174	1.552985461	0.242456005	0.363648057	0.198709663	0.220094581	0.304427592	0.729026661	0.595149463	0.203832552	0.643319784	0.444699384	0.090879434	0.72784199	0.824334486	0.731536196	1.046510107	0.340751757	0.382063424	0.281659298	0.119959321	0.641357658	0.081038099	1.714189881	0.036398554	0.217642989	0.174927491	0.823333928	0.534471182	0.203346634	1.008646573	0.362300006	0.260653464	0.119025689	0.258356144	0.101611367	0.316978537	0.501384998	0.262343749	0.187296071	0.20917539	0.417161277
E08000029	2009	0.442942293	0.54728173	0.567066609	0.407072519	0.168806326	0.18766217	0.583999889	1.601709688	0.267687555	0.410577995	0.220853213	0.27428875	0.339561114	0.726466166	0.697706283	0.223458299	0.776069156	0.519418501	0.093252335	0.824654812	0.896477039	0.865097799	1.154379464	0.38753377	0.450434101	0.338307793	0.132018074	0.765434885	0.075867657	2.01419203	0.040300694	0.24274167	0.203357779	0.881805472	0.579836127	0.20900759	1.461147725	0.453076811	0.278260566	0.090259865	0.295222023	0.108555949	0.327913362	0.597920745	0.31080517	0.204484351	0.239045879	0.46032859
E08000030	2009	0.393261263	0.501322973	0.526924716	0.381279183	0.152085858	0.169341544	0.534415485	1.655573198	0.256101004	0.382427495	0.205741249	0.244163638	0.307325793	0.72115948	0.643564218	0.215078176	0.703878019	0.475281229	0.089778838	0.771837869	0.845711377	0.796881947	1.094718657	0.361754695	0.410697394	0.306253639	0.122212472	0.694759326	0.074198039	1.868546637	0.037500678	0.223492959	0.185539266	0.822357969	0.561814905	0.200247356	1.181059972	0.40556894	0.262748834	0.103481134	0.276544481	0.103892609	0.306322348	0.542179624	0.287544041	0.187776028	0.21490157	0.425779997
E08000031	2009	0.37638304	0.478280908	0.525778475	0.347012742	0.159450129	0.164880923	0.538374501	1.552103704	0.240093187	0.363187479	0.198122938	0.223209344	0.315128035	0.715526156	0.605552419	0.20513165	0.641505919	0.440331548	0.093337592	0.728663036	0.825987472	0.734460975	1.043143727	0.341292017	0.383831448	0.277475512	0.126188824	0.641695738	0.087004403	1.693905685	0.035670619	0.222064611	0.179222514	0.840521886	0.526325615	0.206816855	1.041492625	0.362324872	0.263509675	0.104971424	0.259800953	0.101775902	0.3277699	0.514913699	0.257912746	0.192321182	0.216548222	0.416036597
E08000032	2009	0.361110215	0.461912445	0.493878092	0.338225969	0.149611618	0.153080081	0.507229716	1.467510479	0.233050918	0.350393788	0.181953305	0.210087347	0.296014416	0.674627468	0.587525317	0.197653388	0.627289609	0.430127541	0.089434748	0.698161081	0.784749437	0.693478808	0.984809913	0.318585933	0.363717972	0.270415126	0.118287149	0.606788591	0.079209855	1.608190525	0.034957459	0.21120485	0.16579924	0.786095903	0.512254254	0.190993533	1.030897834	0.342409739	0.243809889	0.113588365	0.243102875	0.092730896	0.304237151	0.472500759	0.256419472	0.178481106	0.207636671	0.397457573
E08000033	2009	0.406045291	0.517538288	0.531062085	0.390305129	0.15289303	0.171773978	0.540136566	1.667247126	0.253677429	0.38828252	0.206245407	0.255208542	0.31713417	0.715542795	0.662625955	0.214564101	0.733244646	0.495716729	0.088191546	0.779902408	0.856381451	0.815529703	1.106361633	0.368332334	0.421126065	0.319280971	0.122046833	0.722071755	0.069643688	1.928764301	0.037592474	0.22817824	0.186588707	0.836493036	0.565967989	0.195711946	1.330747444	0.426515814	0.259266034	0.09350276	0.275564237	0.103205898	0.294906074	0.539194243	0.30154737	0.186307237	0.217966305	0.437106265
E08000034	2009	0.388360097	0.495094415	0.518722623	0.364988742	0.151039071	0.164804057	0.529354801	1.565039461	0.24397073	0.372046622	0.196917954	0.236336975	0.310109089	0.700263838	0.630220491	0.206598944	0.686999172	0.469702097	0.088955392	0.74502914	0.82911913	0.762010749	1.055678348	0.347511853	0.397345418	0.29758584	0.121697672	0.676604685	0.074003553	1.787750971	0.036843875	0.222395067	0.178940523	0.820822491	0.540542456	0.195237901	1.211982739	0.391375046	0.254060205	0.102429833	0.262333611	0.099656191	0.302126148	0.518210014	0.280807955	0.185744897	0.216219182	0.421241599
E08000035	2009	0.386680809	0.500682305	0.51225192	0.375318899	0.147070065	0.159486375	0.525106095	1.616675664	0.24033275	0.368678325	0.193388875	0.233482192	0.31046697	0.696341036	0.631131442	0.202763584	0.693966599	0.485493552	0.087249177	0.734750906	0.821309062	0.754235981	1.051933244	0.340671256	0.398244061	0.300067424	0.119418006	0.674194804	0.070378566	1.814211473	0.036188743	0.220569056	0.175935149	0.806042274	0.537323727	0.189902087	1.249760055	0.392446827	0.248636389	0.098340482	0.253741742	0.095994223	0.28481725	0.513617429	0.292184673	0.180267052	0.209141645	0.427384793
E08000036	2009	0.407172677	0.525722105	0.537502097	0.398269128	0.147475669	0.174616829	0.536586408	1.765682787	0.261327596	0.396914295	0.212936082	0.262726794	0.311429479	0.729767546	0.679212923	0.218502026	0.75698391	0.511114965	0.086125619	0.805337947	0.862777226	0.843806563	1.141034644	0.382001029	0.431158281	0.329473745	0.120292154	0.746029046	0.065902889	2.018913435	0.0389039	0.229299439	0.192108224	0.833252716	0.58837457	0.195329023	1.342285552	0.447366983	0.261950146	0.093375232	0.282744281	0.105932453	0.290518075	0.565280045	0.314339537	0.184971132	0.216415928	0.437750654
E08000037	2009	0.414880977	0.534506845	0.546293244	0.409412347	0.152006093	0.176490482	0.548736643	1.793155131	0.262992506	0.3997353	0.215776638	0.265022019	0.319393952	0.734207313	0.686321528	0.221405862	0.766765992	0.516989771	0.087594065	0.810463098	0.875038529	0.849499672	1.154639003	0.383204611	0.439846572	0.332705375	0.124237147	0.748956173	0.068839302	2.037176924	0.038651096	0.233292014	0.195700753	0.844262142	0.590597451	0.19991479	1.349300233	0.449368971	0.26663929	0.095500136	0.285825707	0.107305337	0.295898345	0.570332486	0.317697685	0.188259946	0.22070985	0.444150142
E09000001	2009	0.448774653	0.591751625	0.6065209	0.411264845	0.162475313	0.185379933	0.622016384	1.98693468	0.257035174	0.407222371	0.217205434	0.28352407	0.39407137	0.791553692	0.737699145	0.234158961	0.808642735	0.587393873	0.092504619	0.831547011	0.915862849	0.882005951	1.215610169	0.390523538	0.467717378	0.342634377	0.153136842	0.785463799	0.083141813	2.079200798	0.036447307	0.259365436	0.214559363	0.957106785	0.60034258	0.212011388	1.518498783	0.464291422	0.284930661	0.07526921	0.276352314	0.111468629	0.331434996	0.577499086	0.360562607	0.215713584	0.251849136	0.49882613
E09000002	2009	0.360067468	0.469162048	0.502207952	0.360445725	0.154227781	0.149218188	0.518639233	1.298446344	0.236444874	0.354889122	0.183082718	0.193136045	0.315132114	0.739251817	0.560525022	0.191747281	0.601682712	0.449067165	0.096002847	0.68600387	0.822380392	0.667531785	0.993250842	0.310617286	0.357071785	0.265605508	0.118673235	0.613530738	0.0840517	1.58187718	0.037102807	0.217557103	0.156386045	0.840898983	0.512245399	0.202852888	0.967929068	0.317973522	0.252538887	0.149722168	0.2373771	0.093790028	0.31696865	0.440501904	0.252668202	0.18687613	0.204973557	0.444766776
E09000003	2009	0.44088243	0.541691739	0.574095257	0.380880036	0.183137565	0.176801926	0.61392934	1.467983142	0.251004979	0.399040407	0.194071821	0.239737367	0.381399331	0.729547873	0.661204804	0.212375796	0.717693658	0.495779672	0.102712923	0.759523476	0.872682768	0.75608804	1.071372892	0.344421031	0.410506016	0.303751762	0.144495035	0.686945273	0.093156559	1.734852292	0.040657751	0.244883815	0.183558778	0.928420473	0.534995454	0.212209832	1.270606174	0.372618165	0.273463716	0.113979677	0.26645012	0.098418338	0.353550862	0.50160247	0.288463199	0.211406817	0.252269768	0.479731864
E09000004	2009	0.446035598	0.563796299	0.576414502	0.425570322	0.168804731	0.182682967	0.590472788	1.599137738	0.273909579	0.417221799	0.219530831	0.269179467	0.348479073	0.762496802	0.713283675	0.225717119	0.786377397	0.542726798	0.096807834	0.830784816	0.918504555	0.858696918	1.170005998	0.384089206	0.451761825	0.345758752	0.134772757	0.77103082	0.077748124	2.040915093	0.041525115	0.246421866	0.199274148	0.908516512	0.596596359	0.211793461	1.437213563	0.447334992	0.278780712	0.110160548	0.29242629	0.107151823	0.326259951	0.564670605	0.32399556	0.20392685	0.239155145	0.484225828
E09000005	2009	0.372184525	0.463435427	0.538129465	0.304113293	0.180529476	0.157946408	0.581665262	1.221716839	0.217472598	0.343187402	0.171141857	0.178145948	0.364123885	0.754341138	0.533037602	0.18110144	0.549028933	0.427223709	0.113238157	0.641663995	0.807834358	0.607597665	0.958683324	0.292327049	0.330193091	0.229368879	0.133943389	0.570065743	0.112356501	1.359510667	0.038709925	0.23170407	0.156767786	0.916734666	0.467326638	0.219562621	0.835595526	0.272455312	0.264474185	0.12209247	0.23276225	0.090905639	0.371074392	0.433691737	0.219391178	0.212672189	0.233151432	0.439923795
E09000006	2009	0.482170149	0.595198288	0.608684489	0.439542554	0.184436072	0.190829474	0.636786726	1.558315278	0.271063179	0.431080136	0.221146373	0.280048944	0.382885135	0.75657746	0.727188975	0.225780489	0.816646019	0.567930327	0.104588986	0.843585565	0.943132307	0.867854101	1.183642037	0.388415647	0.466683797	0.353601202	0.144620367	0.792637343	0.084616249	2.065260473	0.041699597	0.260470319	0.206839385	0.95311593	0.587360603	0.22054612	1.624739839	0.454924213	0.287698433	0.108881141	0.291623262	0.10718913	0.348372163	0.582588792	0.331025582	0.217495074	0.262668682	0.514871277
E09000007	2009	0.454826859	0.551418889	0.56613168	0.361431067	0.185365935	0.16399963	0.632800728	1.559733885	0.234314263	0.378149667	0.17619307	0.238403325	0.412765085	0.708775511	0.643445808	0.200383398	0.703242566	0.510786436	0.102485978	0.714368711	0.843121552	0.701307226	1.026461745	0.321824677	0.400640018	0.294003662	0.145162164	0.65044206	0.094792914	1.642898326	0.039188015	0.241342301	0.181649662	0.934665575	0.490265495	0.204994278	1.391670147	0.347154198	0.267630149	0.093426881	0.233681461	0.093508852	0.349539746	0.488956096	0.289389944	0.207986265	0.25728431	0.491135512
E09000008	2009	0.409146851	0.516965233	0.551244807	0.372172841	0.172320765	0.164700681	0.577563237	1.40310502	0.242317943	0.37871361	0.191269966	0.218863527	0.358882423	0.766613313	0.611818548	0.198483924	0.664714557	0.49679303	0.105286942	0.729405666	0.869376871	0.710900606	1.057720613	0.331404112	0.390474354	0.287883964	0.1346914	0.685531166	0.088098156	1.726547709	0.038633368	0.236945492	0.173172007	0.903771965	0.52494509	0.214080739	1.191596732	0.355107849	0.269574476	0.118791795	0.255296221	0.096856332	0.337437209	0.498318561	0.276992886	0.207656387	0.230408107	0.474799949
E09000009	2009	0.413981943	0.496966646	0.554638359	0.312097755	0.192999874	0.163653649	0.612905135	1.253971094	0.227006412	0.357350516	0.170510934	0.198945851	0.386912732	0.740096984	0.572870957	0.188307968	0.592561678	0.442958362	0.112234999	0.669513415	0.822431109	0.62990213	0.979065428	0.298166483	0.357308691	0.251333719	0.147583678	0.608226247	0.109216946	1.418963002	0.040583145	0.239222732	0.168067877	0.927701548	0.473797018	0.218377564	0.957677292	0.286747867	0.275588708	0.112998912	0.236982804	0.092093543	0.373389064	0.454947154	0.238534932	0.222465578	0.249454658	0.454642574
E09000010	2009	0.387053224	0.493254712	0.540293207	0.35909734	0.167500677	0.164141358	0.563582509	1.347255593	0.2423618	0.36891117	0.194153742	0.21251315	0.343906334	0.751684207	0.597221193	0.200071721	0.63556963	0.461898462	0.100805067	0.718483245	0.849353841	0.708863224	1.040246539	0.331261263	0.377632169	0.275845507	0.13246629	0.651212333	0.092728599	1.631525533	0.038304076	0.230546551	0.173199294	0.902836291	0.522381191	0.212629649	1.04373396	0.343134151	0.26817379	0.124856765	0.25633375	0.099929497	0.342677148	0.476907774	0.261202595	0.201776958	0.225797271	0.452090837
E09000011	2009	0.397791681	0.512991662	0.533782947	0.373451933	0.164534088	0.156673315	0.564270169	1.413581783	0.24046538	0.368517016	0.185076204	0.217798617	0.349719379	0.73264762	0.609133089	0.196512887	0.663331641	0.486670517	0.097491106	0.707849017	0.844312702	0.701936176	1.033792392	0.320115423	0.381773868	0.288579158	0.133983203	0.654508793	0.087328509	1.668172995	0.038390659	0.227823874	0.169216961	0.881879586	0.518150955	0.202414781	1.182342879	0.348918002	0.261419664	0.128413561	0.243258946	0.094030298	0.322474301	0.466053251	0.282537004	0.190856021	0.227584776	0.465653932
E09000012	2009	0.368736078	0.476640854	0.509767211	0.315966169	0.159926501	0.141727194	0.559445141	1.323452045	0.211739939	0.338112227	0.159583041	0.178443692	0.366935441	0.741775417	0.544448653	0.176163017	0.578319266	0.456508886	0.100108558	0.619275943	0.793506843	0.591219514	0.940288695	0.278747814	0.323909197	0.244910622	0.130973733	0.57720991	0.093764456	1.411018277	0.039625744	0.218879684	0.147380365	0.877898528	0.459470455	0.195217485	0.964479288	0.275100665	0.250333602	0.110553134	0.205759891	0.084973437	0.310938296	0.410259074	0.250314508	0.187027861	0.215988632	0.453301282
E09000013	2009	0.439878457	0.551829765	0.571739087	0.366619958	0.175129418	0.159065404	0.630009556	1.534180713	0.230527938	0.381415382	0.177753887	0.220084969	0.411172799	0.735155982	0.627541461	0.198095253	0.698170414	0.527567949	0.102799065	0.703394024	0.867542201	0.687902414	1.029529588	0.316769078	0.38744558	0.291817192	0.148458599	0.652985534	0.094165541	1.660002974	0.03833737	0.2408851	0.171689927	0.939830127	0.499557142	0.202711999	1.337246318	0.340460027	0.271131172	0.104547248	0.224587272	0.091251428	0.326278855	0.465431519	0.298711369	0.200901604	0.248380971	0.508026357
E09000014	2009	0.376041002	0.484703804	0.530466593	0.328744153	0.165948062	0.15239577	0.571465354	1.337316613	0.226392013	0.348059894	0.173608226	0.195794273	0.363549457	0.741496407	0.565360491	0.190231437	0.59663756	0.451996548	0.100732563	0.656257764	0.817088428	0.638588202	0.985226836	0.300788536	0.351405307	0.257554799	0.13883748	0.615692787	0.095421314	1.482718568	0.038451015	0.225144846	0.161725474	0.906710723	0.483249304	0.205859685	0.972750856	0.299015304	0.266065169	0.110073706	0.229925518	0.093705832	0.333030115	0.433303868	0.249671269	0.195213706	0.223631072	0.462387733
E09000015	2009	0.438489364	0.500867534	0.583443242	0.316705037	0.207358092	0.179526745	0.641819463	1.180535271	0.232942894	0.367067698	0.1808071	0.204904466	0.39659238	0.736858911	0.585700265	0.19075471	0.600851359	0.438214147	0.123983571	0.700374868	0.842482141	0.663790522	1.005526908	0.312178961	0.376907659	0.251694768	0.144131379	0.615564364	0.119443609	1.439020508	0.041128899	0.250500589	0.1769532	0.955879396	0.477396805	0.228291383	0.970510155	0.302344367	0.286738808	0.114158925	0.254586556	0.095197597	0.406203548	0.489143465	0.234156292	0.250519242	0.271291786	0.450577636
E09000016	2009	0.459201321	0.571813547	0.588669185	0.42754579	0.173815329	0.18803895	0.606159561	1.591846543	0.270799382	0.419369446	0.222785131	0.274115003	0.357403854	0.757999497	0.717826003	0.224303962	0.791012401	0.549064708	0.099726656	0.836215841	0.923881635	0.867307634	1.181993988	0.390857869	0.460274726	0.344314524	0.138384199	0.789253456	0.080236856	2.070421183	0.041371671	0.251263842	0.20401893	0.917189094	0.59126405	0.216947275	1.504246357	0.459468071	0.28344553	0.10358964	0.296516799	0.108442101	0.337205002	0.588637442	0.320730632	0.210503581	0.24590737	0.487978816
E09000017	2009	0.433698574	0.521607097	0.559910098	0.346976656	0.18974193	0.170787857	0.611014288	1.298762136	0.24054792	0.376056653	0.183724105	0.221211969	0.372156742	0.722194761	0.622865945	0.19789829	0.65164197	0.474008801	0.110332908	0.724564905	0.859305694	0.700466938	1.027433262	0.318776059	0.391784169	0.28065427	0.141057035	0.655185692	0.099630456	1.603857029	0.040563208	0.242204825	0.176949985	0.905793452	0.509408504	0.214383034	1.144002269	0.33969036	0.276729156	0.110307657	0.255344417	0.093866477	0.352158944	0.492657417	0.267558938	0.223435318	0.25236875	0.449409793
E09000018	2009	0.420116103	0.510184724	0.558719216	0.320388254	0.191539252	0.165524289	0.617802634	1.285430861	0.234527045	0.364638675	0.173804581	0.203283444	0.379044759	0.74644787	0.594008111	0.193263258	0.606235022	0.451619582	0.115238485	0.691095903	0.840238337	0.645770554	0.995216345	0.301109673	0.361991491	0.261986885	0.148513143	0.613596835	0.110336145	1.459098164	0.041022719	0.242468002	0.170658532	0.919632882	0.490373183	0.219889064	0.986816068	0.301257264	0.2793031	0.123406889	0.241781513	0.092695703	0.368939655	0.463801998	0.248763222	0.223073751	0.254632918	0.439136645
E09000019	2009	0.44005451	0.553643126	0.556293676	0.367211513	0.174958116	0.15751685	0.613602185	1.629267553	0.233816002	0.371212414	0.175771829	0.228508056	0.402802303	0.722342631	0.641100079	0.20134643	0.708698698	0.529278132	0.099562493	0.703235438	0.849641494	0.70243858	1.021798421	0.316492143	0.388748295	0.297136854	0.145549741	0.654169066	0.093330389	1.674675175	0.037642913	0.239307076	0.174564548	0.913876289	0.501802231	0.194983386	1.41272436	0.351474201	0.258836448	0.093371142	0.229041837	0.089678004	0.319421873	0.466452453	0.309788047	0.19435721	0.245460123	0.492363096
E09000020	2009	0.503400279	0.574962769	0.601798808	0.376383794	0.199976763	0.17679903	0.66833794	1.594790795	0.247527489	0.393205647	0.188040284	0.256176727	0.442406763	0.717447811	0.651869253	0.212967857	0.745397017	0.521753528	0.106464481	0.747241365	0.883186587	0.748833435	1.074523463	0.349350744	0.428459177	0.315796732	0.152797655	0.702175746	0.099896167	1.727874814	0.038824686	0.252741249	0.199768681	0.996501344	0.494991914	0.214995163	1.569872732	0.371664624	0.287447902	0.09902702	0.24440117	0.101776878	0.376437773	0.505558423	0.295991712	0.219198269	0.277865078	0.529366229
E09000021	2009	0.462739335	0.572108427	0.580776582	0.3990101	0.183582448	0.175043211	0.62549087	1.49149045	0.258586206	0.406698408	0.196227151	0.253124175	0.380992302	0.730922032	0.685269853	0.212027077	0.762308211	0.536989789	0.105170964	0.780890621	0.894554012	0.77885175	1.099859926	0.345604028	0.430248647	0.328518264	0.142872534	0.720947624	0.087674159	1.855551858	0.041498502	0.24994095	0.191703636	0.925114312	0.54783915	0.209372186	1.495251047	0.398342104	0.276639624	0.106996465	0.262777156	0.096280613	0.339698528	0.537595563	0.314687671	0.214246573	0.25831339	0.493706827
E09000022	2009	0.382773743	0.508205799	0.538286536	0.346162277	0.155572728	0.146352378	0.574055019	1.464714049	0.221817966	0.354701636	0.173072998	0.193925428	0.379738504	0.767822267	0.586886529	0.188241819	0.636377057	0.507840896	0.100912876	0.659397428	0.841940466	0.643692129	1.009919127	0.298570697	0.354321756	0.273815991	0.135987328	0.641820119	0.089510115	1.593024232	0.037853855	0.227104913	0.154515613	0.908043813	0.494864581	0.195689707	1.142596389	0.314517925	0.260683188	0.108170666	0.218102126	0.08779885	0.30104794	0.43777344	0.285893287	0.185829351	0.220107318	0.488344663
E09000023	2009	0.377639292	0.498161267	0.541450889	0.359758693	0.158746085	0.15317241	0.565656296	1.385481049	0.2242613	0.36337746	0.181498702	0.197490892	0.368236687	0.781415744	0.571270931	0.19077068	0.628791307	0.494989685	0.101831118	0.681095579	0.858494795	0.662978927	1.032387487	0.315464058	0.363206276	0.27194082	0.132595072	0.655147473	0.090254337	1.632965902	0.03686371	0.228236944	0.157722605	0.914002235	0.507835003	0.208862851	1.106026584	0.325281655	0.263948664	0.122468306	0.236281908	0.093115249	0.31948453	0.453515281	0.270515611	0.196088227	0.21862102	0.495615721
E09000024	2009	0.448898278	0.54334639	0.582789958	0.361309427	0.190290643	0.174237077	0.635811404	1.386167859	0.240307188	0.391793101	0.183472949	0.227450045	0.408642173	0.75590209	0.634596446	0.200597992	0.689974083	0.504719743	0.110862611	0.731791507	0.876820857	0.709864382	1.055545932	0.327048533	0.397607721	0.292440558	0.147737846	0.668857365	0.099492486	1.647699002	0.040380006	0.250331441	0.178938047	0.952836523	0.515639946	0.216412826	1.251537921	0.346557738	0.278422143	0.113785212	0.25479819	0.095483387	0.356906349	0.492298631	0.279321658	0.220744316	0.261689933	0.494968524
E09000025	2009	0.310024032	0.402023503	0.472564381	0.247272038	0.163329805	0.132123264	0.521811976	1.015809169	0.198540157	0.295165237	0.147209049	0.134562663	0.314791149	0.704545051	0.454890691	0.165968304	0.43614198	0.35012376	0.104314754	0.554310251	0.70674217	0.487348183	0.828554799	0.243898166	0.270313629	0.18709263	0.124837551	0.458283714	0.113409222	1.064555111	0.034669948	0.204583805	0.137043248	0.838907359	0.412403734	0.20052928	0.566601844	0.193948048	0.23944969	0.130971427	0.185296945	0.079881917	0.352060875	0.346631297	0.177889475	0.188868348	0.208779975	0.394567694
E09000026	2009	0.416170065	0.481856982	0.552073884	0.304969777	0.19898132	0.167629797	0.608028281	1.132689939	0.230375317	0.352442797	0.171330354	0.195237171	0.380296833	0.709667482	0.566030331	0.185937105	0.571983535	0.423728206	0.115800815	0.668573984	0.810474914	0.628401641	0.964757207	0.293680652	0.356865283	0.242035356	0.1447566	0.598753827	0.114132422	1.367997178	0.038899996	0.238304711	0.166877814	0.915756443	0.469308509	0.218655365	0.929629964	0.282662569	0.2748164	0.118010264	0.24276147	0.090622172	0.385622328	0.454949888	0.228262966	0.229727079	0.255322603	0.439651524
E09000027	2009	0.503107779	0.60994754	0.618464648	0.42336046	0.199877896	0.188947131	0.668918521	1.515229282	0.262934146	0.434503011	0.205874715	0.27869763	0.41988373	0.735509157	0.725535275	0.226611601	0.820242263	0.563632733	0.107231692	0.826919701	0.930103342	0.829113723	1.145192782	0.367569285	0.46232147	0.351591021	0.151904175	0.760785643	0.090294614	1.95219768	0.041051728	0.264946849	0.205110146	0.981060768	0.558159361	0.21725064	1.691981547	0.427666607	0.288046063	0.097873091	0.27326768	0.101279545	0.360007823	0.547082232	0.328640953	0.222329587	0.279361876	0.533802428
E09000028	2009	0.386272011	0.51466684	0.536136839	0.369661059	0.155976314	0.149041718	0.566406171	1.547314447	0.231176006	0.364972834	0.17950666	0.204626364	0.366051812	0.759555229	0.599661077	0.194873437	0.663601451	0.508011368	0.097821975	0.684407109	0.849722701	0.673857911	1.021189507	0.310680868	0.367032751	0.282632615	0.132855353	0.644371917	0.086972806	1.648487786	0.03638914	0.22735374	0.162079754	0.888976087	0.510577478	0.197275376	1.190438301	0.329513811	0.259820232	0.123493966	0.225710704	0.090900594	0.30643453	0.450581511	0.290851063	0.184917144	0.221000725	0.482475368
E09000029	2009	0.462528441	0.5749293	0.58989036	0.410452415	0.186157703	0.180686562	0.627735183	1.501780761	0.258789163	0.41533823	0.205505397	0.259078791	0.38352665	0.760494371	0.695966026	0.218512218	0.764607529	0.542260662	0.107796007	0.805147087	0.926558393	0.810332158	1.137012864	0.362843941	0.438807602	0.328854112	0.145188377	0.739758076	0.089555583	1.917682906	0.042131009	0.255755371	0.194281088	0.945718476	0.56924224	0.216750429	1.461473424	0.416048041	0.281090109	0.109162838	0.275887891	0.101586054	0.341011171	0.542456409	0.317673679	0.216232201	0.254721599	0.495619707
E09000030	2009	0.372074936	0.441457352	0.475630686	0.255435417	0.176859194	0.131286364	0.559460577	1.312314729	0.214380399	0.313248083	0.131818307	0.16480053	0.35864173	0.666165945	0.510362347	0.164542693	0.501176457	0.377838636	0.098068766	0.561508744	0.690555103	0.498756855	0.823761996	0.241231723	0.284971652	0.211324733	0.134187173	0.463467703	0.10696291	1.120263673	0.041206995	0.204764416	0.141388622	0.828782617	0.398094199	0.194123213	0.76361086	0.207590518	0.24068833	0.111338256	0.178241007	0.076286275	0.342927261	0.369982274	0.209823255	0.191342418	0.222556242	0.396630793
E09000031	2009	0.387321512	0.493549159	0.534367557	0.342871156	0.170414538	0.156717212	0.56870616	1.371764941	0.230712847	0.358999825	0.177193086	0.204371204	0.35795304	0.735627261	0.582667276	0.194002935	0.621937897	0.461859348	0.101010633	0.682345409	0.821885858	0.663479298	0.999740094	0.308599886	0.361942647	0.266657513	0.135445412	0.62576923	0.096013298	1.542548063	0.037972439	0.227194472	0.164434854	0.889863101	0.502725569	0.206345417	1.042258651	0.316009179	0.260959039	0.122118874	0.240874551	0.092283555	0.339208779	0.447047377	0.258546403	0.19841059	0.231975525	0.458197623
E09000032	2009	0.480947551	0.590926433	0.588034234	0.386037484	0.190310688	0.161636121	0.66653665	1.514791405	0.23476298	0.386360469	0.171574889	0.232009663	0.439152743	0.730826316	0.659735349	0.199292293	0.745416715	0.567949137	0.107255284	0.72468478	0.886250678	0.70327742	1.042454214	0.314870619	0.408672529	0.31120363	0.146360215	0.678816626	0.094621602	1.711113015	0.039494064	0.251593851	0.180387204	0.957917685	0.50366099	0.201382368	1.622240523	0.354924985	0.267969269	0.101290046	0.225963874	0.085350611	0.342721823	0.49534646	0.325755483	0.210411929	0.2669681	0.528953332
E09000033	2009	0.490512437	0.564799697	0.584659517	0.354775464	0.200070782	0.167879642	0.664609345	1.603077463	0.239105484	0.383015947	0.176460326	0.244982313	0.441570475	0.714879321	0.646516384	0.199338801	0.706641288	0.50489244	0.108427882	0.717154878	0.850132317	0.698487226	1.038886666	0.325068358	0.401700434	0.298725394	0.152064398	0.651671378	0.102329643	1.629377322	0.041248096	0.249124961	0.188959706	0.965892537	0.481816733	0.214860065	1.3823082	0.340548463	0.279473434	0.093524332	0.236636679	0.097205271	0.371112944	0.501431116	0.281788639	0.223205437	0.274971486	0.504003097
S12000005	2009	0.439740533	0.548153317	0.56808667	0.413851873	0.158864496	0.190648706	0.571501509	1.755743343	0.270820223	0.415484621	0.227153297	0.283420952	0.331031888	0.738710228	0.70645003	0.223456257	0.789291346	0.524557938	0.089559839	0.845623463	0.895305617	0.897934378	1.19610652	0.408567707	0.46122326	0.341527269	0.130486016	0.79259285	0.068182463	2.123034276	0.039267602	0.242774172	0.207290364	0.870912825	0.608362995	0.209276385	1.472576383	0.48547651	0.278173127	0.082225686	0.297975336	0.112916348	0.317214299	0.630474337	0.320085705	0.199525724	0.231016376	0.443430433
S12000006	2009	0.416155021	0.526689693	0.539995442	0.398963784	0.149084867	0.17070279	0.535492263	1.881557315	0.259354514	0.383937011	0.20834213	0.261940167	0.315140235	0.715664943	0.680865375	0.220697972	0.75938738	0.513016297	0.083660134	0.791142443	0.845753901	0.833190982	1.13151449	0.372320009	0.434797853	0.327358818	0.123038957	0.730078937	0.066871983	2.00911869	0.037591457	0.226059741	0.193280088	0.813325166	0.570602289	0.192811373	1.37807988	0.442121773	0.256121663	0.08986645	0.277935442	0.104490635	0.284426725	0.546993738	0.314023835	0.183444619	0.216422488	0.4454194
S12000008	2009	0.444281484	0.556389661	0.571204095	0.428734131	0.161353759	0.191830575	0.575689633	1.780320022	0.276660322	0.425024325	0.23083675	0.285393461	0.329364716	0.752924816	0.726507567	0.232415402	0.807067443	0.535846838	0.088788484	0.862422447	0.918568257	0.911823909	1.202813489	0.409457505	0.467332681	0.354584702	0.128177536	0.801923406	0.069809582	2.152639221	0.0423846	0.245663688	0.206952106	0.882980542	0.615005662	0.208747692	1.482692121	0.484434892	0.280013405	0.089824	0.306956029	0.113855665	0.319516752	0.626207477	0.327176195	0.199276526	0.233270704	0.463009219
S12000010	2009	0.445723996	0.559285062	0.566997177	0.425412629	0.160956667	0.185592208	0.576487834	1.746611523	0.270862177	0.423823375	0.222388589	0.278906595	0.334603312	0.741260178	0.724959112	0.228834826	0.803215507	0.537635483	0.091312306	0.847969176	0.913377304	0.892696918	1.182126537	0.393883235	0.458783262	0.34993777	0.131229864	0.783036591	0.071090681	2.118673982	0.042208482	0.245416506	0.201166937	0.874757595	0.606178306	0.206936145	1.542082387	0.469183071	0.271633134	0.094268225	0.29698966	0.108089418	0.316276244	0.618403756	0.328334086	0.199445034	0.230986716	0.467118975
S12000011	2009	0.411055048	0.526089224	0.530578436	0.385851227	0.152750901	0.162555073	0.541226191	1.662705173	0.24974679	0.370255149	0.195217163	0.250335058	0.324592093	0.680969516	0.663966594	0.208254014	0.736835113	0.512505838	0.08621805	0.747442133	0.828713506	0.778690883	1.065431659	0.345493861	0.414507096	0.316821011	0.124604152	0.699176625	0.06974604	1.87652732	0.036128805	0.225275325	0.184049798	0.821525853	0.534770828	0.186024163	1.418277068	0.415180602	0.249440544	0.082278351	0.258512615	0.096521689	0.282875523	0.523711876	0.310186	0.182135619	0.22078011	0.444306734
S12000013	2009	0.44751956	0.545696541	0.566722724	0.407402792	0.163665432	0.191437765	0.571929893	1.670127947	0.267962021	0.408312771	0.227417306	0.289244881	0.333039664	0.714131875	0.702198187	0.225066622	0.783800791	0.520245832	0.090103621	0.830464237	0.879937941	0.897128704	1.186847696	0.403774776	0.464752844	0.34428099	0.130656142	0.795768252	0.068703456	2.100769745	0.038569245	0.244610526	0.20992542	0.870162237	0.583309278	0.208116818	1.510107606	0.482915131	0.280485682	0.071407997	0.302012336	0.114034642	0.322536233	0.630736945	0.311226085	0.202380268	0.236758791	0.45015375
S12000014	2009	0.43266655	0.557135458	0.560753189	0.424504489	0.156131363	0.179543923	0.566626679	1.802662724	0.26783454	0.411379177	0.219359976	0.274234751	0.330934562	0.748680393	0.707968787	0.224817699	0.794667723	0.542328115	0.090924982	0.83089632	0.901595746	0.872234659	1.178925644	0.390466933	0.451330001	0.346266147	0.128652863	0.778547995	0.070184823	2.099154712	0.040709368	0.241458231	0.198273024	0.873615189	0.607961025	0.202720459	1.495937939	0.465561732	0.270088589	0.095030208	0.290723889	0.107565046	0.302275403	0.591570874	0.330216282	0.193429014	0.227855321	0.462256717
S12000015	2009	0.432608367	0.554303277	0.562750011	0.42208146	0.156473042	0.183104191	0.565684007	1.824726833	0.269539634	0.412088721	0.222676305	0.277312983	0.329455701	0.746245366	0.706379523	0.225183049	0.795117002	0.535969842	0.090396509	0.835629327	0.898850929	0.880764514	1.184102618	0.395365159	0.453141139	0.344782335	0.127499805	0.785029766	0.06958193	2.105744129	0.040371632	0.240314	0.200714818	0.871728229	0.607294391	0.20414517	1.479184637	0.47025181	0.272128657	0.093830221	0.294525665	0.110039536	0.305944514	0.600418023	0.326531329	0.194055101	0.228239111	0.457180724
S12000017	2009	0.450428157	0.563066189	0.578785109	0.420820884	0.16231015	0.188460097	0.581737704	1.77626658	0.270037941	0.418778674	0.224098758	0.285905347	0.340398521	0.740892128	0.718472394	0.230353142	0.809288397	0.543978184	0.09322627	0.854656933	0.907530671	0.897005504	1.198691324	0.405360751	0.463979775	0.347961523	0.133000317	0.80125035	0.069761758	2.13098172	0.040132347	0.246658482	0.207471526	0.884826459	0.60809039	0.208167682	1.562689833	0.481196965	0.276950883	0.087952777	0.296188566	0.110748408	0.315149239	0.608835146	0.327681823	0.200241622	0.237023652	0.464626818
S12000018	2009	0.433401944	0.553123765	0.563520954	0.422895909	0.156024655	0.186639049	0.567166112	1.885767563	0.275780171	0.414559564	0.227480678	0.282881162	0.329110351	0.759814932	0.712455149	0.229864638	0.801733823	0.537859218	0.090050335	0.848265402	0.910758334	0.898417802	1.20778534	0.404207674	0.464127478	0.349302146	0.128081166	0.787270345	0.068685379	2.147222537	0.040043032	0.242902105	0.205429086	0.878980998	0.618712521	0.206561538	1.428781527	0.47629576	0.276133015	0.085387909	0.297493092	0.113420454	0.304224329	0.592678198	0.33387543	0.196088268	0.22665505	0.457575817
S12000019	2009	0.437048925	0.561199674	0.566624847	0.42790578	0.157982609	0.183168691	0.569158138	1.810692455	0.269756741	0.41613254	0.220476063	0.276338362	0.33259889	0.750119587	0.71174341	0.226987761	0.801029661	0.542305665	0.091997459	0.843084377	0.906957666	0.884583871	1.182784104	0.39631036	0.452328297	0.345402072	0.126990096	0.785256281	0.069501668	2.105763619	0.041189978	0.241626688	0.199307874	0.875410412	0.609900968	0.203442389	1.513205324	0.469299439	0.270880447	0.095149294	0.296289079	0.108193848	0.307944258	0.599830274	0.328135125	0.193912566	0.231244983	0.459876342
S12000020	2009	0.437852272	0.554772746	0.571159319	0.416455964	0.158331698	0.186692724	0.566726428	1.805138367	0.27231214	0.417425767	0.222489374	0.282077383	0.332396023	0.750710337	0.718341256	0.231682804	0.800121204	0.53742531	0.089572216	0.857060421	0.896137655	0.891521208	1.194681349	0.403602814	0.457833007	0.344690678	0.127810333	0.791490967	0.067757613	2.127691142	0.039700798	0.243284434	0.204636006	0.875122449	0.611954454	0.206400953	1.505824976	0.475233845	0.27397084	0.094027858	0.297590411	0.111144931	0.307503318	0.594836975	0.325454125	0.197823237	0.233952757	0.459305419
S12000021	2009	0.433578213	0.550209897	0.562309439	0.425523234	0.15740912	0.187466841	0.563164213	1.873986632	0.276290171	0.417287093	0.228594008	0.28236482	0.325704242	0.755913534	0.70952256	0.228167536	0.800710072	0.530684219	0.089330761	0.845776498	0.909492939	0.902991899	1.205074859	0.405748043	0.459893705	0.348432224	0.124801517	0.794458867	0.068757746	2.141404785	0.040499579	0.240185102	0.204129735	0.874743299	0.61654226	0.206071257	1.417102317	0.478107847	0.276294123	0.090078078	0.303400191	0.114882259	0.308418186	0.605041073	0.326746793	0.195035236	0.226973242	0.450215682
S12000023	2009	0.455058197	0.571176144	0.585282517	0.422703047	0.164092003	0.190908701	0.587333776	1.7915249	0.272020478	0.41852487	0.224443979	0.29018766	0.347478808	0.733804684	0.717647338	0.230082607	0.815499265	0.545176638	0.094188673	0.856487332	0.904144187	0.907887325	1.201951831	0.404609132	0.470573759	0.347856945	0.133359894	0.810786198	0.070047299	2.152580978	0.040069518	0.248694852	0.213097617	0.887643606	0.603208958	0.209317595	1.623888678	0.488443378	0.274726701	0.081226747	0.301538871	0.109452535	0.314826435	0.615269875	0.326558683	0.200952536	0.241005782	0.461805894
S12000024	2009	0.455084744	0.566149138	0.583205102	0.424339082	0.166353928	0.193253747	0.589092196	1.742881974	0.273307836	0.421702694	0.229488346	0.290645072	0.342677638	0.738394749	0.725401363	0.23144285	0.814404287	0.541514492	0.092693759	0.862043713	0.913920479	0.912516275	1.205819992	0.408824655	0.468842006	0.350281648	0.133784778	0.810109275	0.071934542	2.148288968	0.041090866	0.249597466	0.211137498	0.893575803	0.605090353	0.212014314	1.563140938	0.490403155	0.280825364	0.084294676	0.303521783	0.11350391	0.325400961	0.633321882	0.326111208	0.204311534	0.240616984	0.465086944
S12000026	2009	0.457353333	0.563795745	0.58462499	0.424649065	0.167651384	0.197283726	0.588554135	1.79867177	0.274000273	0.428247355	0.233294117	0.295406162	0.342685357	0.742792502	0.729918912	0.235129491	0.8203609	0.536298165	0.09070471	0.869540015	0.915227323	0.928393165	1.218373727	0.418173001	0.475626821	0.353231776	0.13156403	0.817756838	0.07089935	2.170589021	0.040932079	0.251115621	0.213227627	0.89724554	0.608737953	0.213208797	1.546204339	0.498178916	0.282444134	0.080400628	0.309807662	0.115985006	0.326822906	0.629269493	0.324739715	0.204786293	0.24091228	0.464194663
S12000027	2009	0.432415091	0.554393957	0.554293343	0.408186557	0.157600893	0.17385883	0.560243858	1.689556791	0.257499188	0.402441377	0.20966359	0.27504117	0.333882627	0.714085439	0.695490943	0.217012199	0.787818725	0.537830632	0.092273408	0.807756895	0.868268457	0.846235305	1.134815751	0.378076529	0.438954252	0.335578522	0.130321715	0.772788203	0.069408277	2.037544431	0.039336957	0.240414761	0.194775445	0.873659648	0.576449364	0.196204597	1.658277209	0.456319809	0.260621189	0.085261804	0.280384677	0.100830458	0.299290422	0.59277719	0.321568725	0.192346057	0.228283026	0.453128873
S12000028	2009	0.463841944	0.570683925	0.588222514	0.439596093	0.172206795	0.197437649	0.596524922	1.79686115	0.276188255	0.424636182	0.235109525	0.29712116	0.347191504	0.739201836	0.734475639	0.232163076	0.821574834	0.543503592	0.091316732	0.866179429	0.919110823	0.922400463	1.216301526	0.415195785	0.4798	0.359026378	0.134459707	0.824486332	0.07432612	2.173627684	0.040739757	0.251313022	0.214324808	0.908159145	0.60454832	0.214722748	1.600181883	0.497766505	0.284507757	0.088659821	0.310735101	0.116310882	0.332911228	0.6286204	0.324113913	0.207001684	0.246643646	0.468800335
S12000029	2009	0.439818648	0.562517257	0.566586313	0.428303204	0.160595289	0.182437005	0.575964201	1.792224837	0.269475734	0.413709941	0.221285288	0.279210663	0.338839633	0.746951371	0.712800429	0.225744645	0.801431662	0.54465299	0.092421849	0.833807636	0.907324411	0.880277687	1.183716771	0.392974845	0.455707452	0.348811458	0.130835839	0.789826264	0.07190033	2.107051937	0.040671583	0.244235576	0.201384381	0.887625394	0.605095525	0.204319717	1.528143131	0.472201637	0.272140894	0.090625373	0.294391584	0.10829414	0.309343372	0.596899054	0.332473142	0.196787435	0.230761828	0.46350683
S12000030	2009	0.440085999	0.562254983	0.566463521	0.426514547	0.161804048	0.184169288	0.575973577	1.800077608	0.267983804	0.413417147	0.221009069	0.276708131	0.336496587	0.737583729	0.713301201	0.225755872	0.794459772	0.537670551	0.09034513	0.833953944	0.89832841	0.873646708	1.169895915	0.391279513	0.455355895	0.346405333	0.128948568	0.781597246	0.07296102	2.08472167	0.041231209	0.242618904	0.201288802	0.881591406	0.593643367	0.20477882	1.537888458	0.468388012	0.271626895	0.089160963	0.29427714	0.108388807	0.312872705	0.59766156	0.323558002	0.196167733	0.235245329	0.467209364
S12000033	2009	0.413866056	0.542707544	0.547386086	0.395998954	0.15403278	0.167915425	0.561349265	1.766634163	0.250399758	0.384495801	0.202737522	0.250333994	0.33288093	0.727684157	0.673536895	0.210094024	0.747208778	0.530341369	0.093460445	0.772793986	0.863773412	0.792981473	1.113963187	0.357969937	0.423128815	0.323420276	0.127777716	0.724452482	0.073299191	1.938633866	0.03702988	0.237081934	0.188542169	0.859789914	0.564608821	0.198139366	1.421350628	0.424536061	0.262002889	0.092996581	0.262047507	0.099849571	0.297382037	0.565089984	0.319053762	0.190477865	0.225379632	0.454505297
S12000034	2009	0.454895328	0.573131859	0.578787228	0.423996798	0.164737669	0.184003288	0.588996767	1.710566005	0.265737283	0.417114966	0.217221281	0.280373174	0.3475954	0.732953027	0.721923326	0.226126037	0.807976749	0.551777806	0.094303028	0.839026964	0.901976538	0.871629528	1.168309804	0.39034915	0.454190592	0.350162856	0.134619252	0.791175248	0.073191407	2.081224671	0.040916884	0.246481243	0.20085675	0.89233629	0.594810401	0.204472177	1.679294154	0.467432218	0.271045886	0.097772816	0.291478649	0.105165393	0.314333681	0.596094606	0.327332816	0.199975151	0.242311855	0.478466888
S12000035	2009	0.462508198	0.564793546	0.586701364	0.421176052	0.171417512	0.201338	0.594020116	1.812838374	0.275355357	0.427543258	0.236566519	0.299841763	0.345221019	0.740514098	0.731895408	0.235475801	0.819829502	0.534855499	0.089209552	0.873312798	0.912623314	0.931090124	1.224271116	0.424042835	0.480452603	0.35583055	0.133170791	0.830278015	0.071556198	2.18940046	0.04058605	0.253912412	0.217246669	0.906682366	0.607214425	0.215841569	1.57510571	0.504284022	0.285772622	0.080575771	0.311787628	0.118423958	0.331720881	0.640956833	0.324076519	0.207829127	0.243516707	0.462450344
S12000036	2009	0.456004335	0.578980262	0.588714117	0.429507733	0.169688178	0.188430025	0.60101651	1.812899683	0.27056	0.422650073	0.224447263	0.285354361	0.355745085	0.76295604	0.726423276	0.229021748	0.812787566	0.555222674	0.097775142	0.849772653	0.926066517	0.886246948	1.20028948	0.400635285	0.461527048	0.353503443	0.136255763	0.805243262	0.077042325	2.114315546	0.040542118	0.251550978	0.206032473	0.925682802	0.608522256	0.211415044	1.611773446	0.473522199	0.282304247	0.093308685	0.299155177	0.11091204	0.326513919	0.609683425	0.331707211	0.205978552	0.247405498	0.476863169
S12000038	2009	0.43405405	0.559116846	0.563986827	0.424240948	0.157858904	0.181764896	0.570167695	1.831588195	0.271600556	0.410204002	0.221493019	0.275777149	0.333375049	0.750962455	0.714561052	0.223710521	0.797863051	0.542973907	0.091216901	0.835207907	0.905056971	0.876841808	1.185626797	0.392745112	0.455195978	0.348577404	0.129551873	0.783836484	0.071177974	2.110690521	0.040349754	0.243412338	0.200445929	0.882394623	0.608661939	0.204617354	1.492280412	0.470142667	0.272788934	0.092476036	0.292051738	0.109839636	0.304528529	0.595942053	0.332360423	0.195024666	0.230417132	0.463145015
S12000039	2009	0.423928057	0.549666866	0.556725401	0.416471412	0.154331056	0.180576152	0.557717758	1.868391186	0.2700146	0.406465697	0.22045294	0.273431833	0.326649538	0.753141267	0.701801195	0.224182577	0.788275271	0.531847582	0.089727324	0.827854719	0.897840921	0.875796879	1.182961322	0.393256251	0.45025982	0.341271371	0.125053672	0.771805518	0.068955104	2.090803168	0.039638435	0.238317695	0.198875959	0.86925558	0.608580462	0.202048873	1.41273176	0.465406372	0.271135871	0.089850046	0.291431983	0.110643574	0.294152208	0.582151709	0.328397388	0.191650612	0.225122727	0.453035415
S12000040	2009	0.41484583	0.545202116	0.544759231	0.417185095	0.148560679	0.17186732	0.547555666	1.806787283	0.266302022	0.4062553	0.210718114	0.263469766	0.320009734	0.752189728	0.692449388	0.222678934	0.77845006	0.535510076	0.090391701	0.815882447	0.890987773	0.848280931	1.152426865	0.37953473	0.435025293	0.338686189	0.12251876	0.75340898	0.067031773	2.046487676	0.041056857	0.23478573	0.189382545	0.856139461	0.603397609	0.195642591	1.418839672	0.445642752	0.262007566	0.099006423	0.283438181	0.10341883	0.286209042	0.56216026	0.329815022	0.185128057	0.220271922	0.455362288
S12000041	2009	0.445468362	0.559399151	0.574737358	0.43033022	0.162623501	0.189492702	0.575848978	1.786770964	0.272955333	0.418610643	0.227554506	0.286379651	0.336755965	0.739662319	0.717194313	0.229909245	0.806303688	0.536053271	0.09091086	0.855072954	0.906309847	0.906729905	1.199208316	0.405153926	0.462164265	0.347804162	0.130514423	0.799070954	0.070515832	2.133351533	0.040521889	0.244076211	0.206891356	0.88205158	0.60690868	0.208931459	1.543428219	0.482673532	0.276804832	0.088869976	0.303571984	0.111701584	0.319174845	0.60989019	0.323337346	0.200417456	0.234997834	0.457590822
S12000042	2009	0.433723519	0.553283139	0.570035749	0.423215966	0.15963403	0.185848451	0.571569804	1.858126821	0.274574325	0.416748666	0.226708397	0.277543086	0.328401446	0.765003531	0.708486723	0.23006018	0.792952057	0.533602009	0.091760347	0.845666413	0.912928618	0.888128772	1.199794901	0.401366017	0.455529006	0.34593127	0.127124331	0.786060572	0.071922577	2.118522216	0.041042287	0.242384592	0.203874508	0.883509736	0.615189395	0.209229118	1.401765178	0.471039091	0.279175758	0.094181253	0.302272654	0.113185927	0.311143203	0.600468026	0.325205663	0.197449762	0.229675707	0.459173057
S12000044	2009	0.419391139	0.548711333	0.550767912	0.421513379	0.149769087	0.175041656	0.551092801	1.854330446	0.269427305	0.407312256	0.215665125	0.267508985	0.321519053	0.756392727	0.701556258	0.223771206	0.786299802	0.538333475	0.090010274	0.826201899	0.895685671	0.861000261	1.169586145	0.385591093	0.442354367	0.342249659	0.123397743	0.765416651	0.067731547	2.079998059	0.040647854	0.235925258	0.193880149	0.858876769	0.610507654	0.198303869	1.423655988	0.455451457	0.265413419	0.09991286	0.287471767	0.106187553	0.28887966	0.572222534	0.331330391	0.187247679	0.221271345	0.456599639
S12000045	2009	0.464397628	0.577063524	0.586271074	0.42664144	0.170952505	0.189485433	0.598912007	1.700943795	0.270337035	0.420003386	0.224665483	0.288211949	0.352089072	0.73451476	0.728328195	0.228360176	0.816231427	0.547664	0.09363456	0.847006705	0.915231273	0.895226652	1.189441703	0.397620318	0.467577864	0.352177475	0.137243843	0.802686862	0.075532473	2.11388461	0.041432064	0.248598543	0.207565209	0.900385289	0.596908983	0.211166127	1.63281976	0.47652533	0.27863188	0.089218335	0.301062266	0.109481778	0.326531068	0.606383209	0.327340079	0.206130165	0.245816104	0.480668292
S12000046	2009	0.391222129	0.516404566	0.523227962	0.382732452	0.151321776	0.162399409	0.536128278	1.810752901	0.25190491	0.373132021	0.199181388	0.244297396	0.319276106	0.722238704	0.655143653	0.210232708	0.718508167	0.497213144	0.087657442	0.752993267	0.842132243	0.779546515	1.089336619	0.350397832	0.411784343	0.310965455	0.124142994	0.68322606	0.072753818	1.879678012	0.03688202	0.224958615	0.183766055	0.835174874	0.5558935	0.194115085	1.241680545	0.408222259	0.25670798	0.089852892	0.260675089	0.101540078	0.283832443	0.52365148	0.308554913	0.181664803	0.213166051	0.434363413
W06000001	2009	0.437981106	0.538137026	0.560454905	0.420704371	0.160682266	0.190996001	0.564826797	1.750740997	0.268690843	0.413178311	0.229231361	0.284269708	0.324227303	0.721862873	0.695817406	0.226325082	0.78673514	0.511775451	0.08688212	0.833612201	0.881525764	0.89497956	1.180382404	0.405731217	0.461952627	0.339293409	0.124969525	0.791843966	0.069026661	2.112578953	0.039167047	0.239974361	0.205701447	0.858060753	0.585768501	0.206863706	1.42247241	0.481432457	0.275546018	0.08778688	0.304325067	0.113566617	0.31962299	0.615058514	0.306882962	0.19658523	0.229311577	0.437073322
W06000002	2009	0.4257347	0.527118117	0.551241013	0.397547656	0.158484086	0.185580615	0.548458625	1.773709121	0.261238601	0.404920259	0.219841157	0.27719168	0.322310202	0.714130037	0.694457038	0.226994226	0.775001909	0.498944129	0.082305555	0.824110579	0.864015955	0.873362677	1.160082552	0.395526447	0.446354459	0.332468614	0.126325436	0.763174791	0.066545266	2.043411234	0.038248952	0.235403413	0.200236071	0.837725127	0.579830993	0.202143243	1.399249569	0.465825242	0.266870089	0.090771036	0.292418824	0.111832946	0.304427198	0.572337421	0.30983424	0.194466345	0.224512667	0.441417525
W06000003	2009	0.447601799	0.538861205	0.573512071	0.414833169	0.16527159	0.195940611	0.575847153	1.714508627	0.271020907	0.416742409	0.23206889	0.288046832	0.33057162	0.722872097	0.7095119	0.229899076	0.788157595	0.512491687	0.087554419	0.8534438	0.890715929	0.90904427	1.195958147	0.41333597	0.470552886	0.340929762	0.130658911	0.794446184	0.069795769	2.119828388	0.039161978	0.243247417	0.213451568	0.868201775	0.59103458	0.213663267	1.429540783	0.484673657	0.281111836	0.085457798	0.305527702	0.116162275	0.328329212	0.614933409	0.30779443	0.203253624	0.235324029	0.449145369
W06000004	2009	0.433042249	0.535258685	0.55914892	0.415058348	0.157607996	0.188543037	0.558488169	1.723271585	0.27200531	0.412327779	0.22516619	0.279544223	0.318806237	0.727736528	0.701956582	0.229448932	0.783370014	0.513874414	0.088718888	0.841583918	0.889936917	0.899989229	1.182358393	0.40359796	0.454019972	0.341549225	0.125614594	0.783848516	0.067647598	2.098790224	0.039201275	0.238320504	0.204048886	0.854485743	0.599660067	0.205596296	1.397097727	0.472087511	0.273982071	0.091422488	0.302289619	0.114522169	0.311375128	0.59499793	0.313158874	0.196367366	0.228178318	0.447673605
W06000005	2009	0.428569929	0.541555682	0.550792273	0.412437409	0.154108627	0.179177612	0.554631401	1.686046158	0.264067233	0.404576382	0.215411523	0.272138844	0.32204945	0.726035235	0.696242767	0.22114068	0.776850838	0.527221748	0.089730965	0.819656379	0.876528648	0.859418351	1.151589983	0.386776386	0.444832779	0.338785096	0.125155001	0.768784208	0.066953763	2.053035523	0.039540103	0.235960089	0.196585436	0.85052491	0.591459412	0.198467119	1.462627427	0.458954787	0.265527018	0.093865312	0.288558929	0.10580343	0.299604931	0.579232521	0.317660427	0.1912727	0.22597066	0.450108422
W06000006	2009	0.416689013	0.533362337	0.541508641	0.406818317	0.151182804	0.174390508	0.546592602	1.70141054	0.259262131	0.397497995	0.212304722	0.26372052	0.318371579	0.7251064	0.681245453	0.217234439	0.762309757	0.519471264	0.08925429	0.804239607	0.8684988	0.838202345	1.137449068	0.378032914	0.435829348	0.331110345	0.12367263	0.747816424	0.067339236	2.010500128	0.038954564	0.233560439	0.192950268	0.840561464	0.584264968	0.197785955	1.395581448	0.444572604	0.262583579	0.099283876	0.279707112	0.104021912	0.294856994	0.572295219	0.314677546	0.187934131	0.219658092	0.44448346
W06000008	2009	0.427739861	0.523834486	0.54964858	0.399825361	0.160911749	0.188656545	0.550934111	1.791628206	0.261111699	0.401993025	0.222623868	0.277534656	0.322243269	0.703953264	0.686569647	0.227510895	0.772889595	0.4939353	0.081447012	0.816471034	0.857695678	0.876015409	1.151019807	0.395215048	0.451318246	0.330840754	0.125321076	0.768260984	0.067080146	2.042754335	0.038109194	0.237214705	0.20131938	0.841116194	0.566456145	0.202224662	1.389444044	0.471107902	0.266431735	0.08427958	0.296940181	0.112267834	0.31182733	0.5911428	0.300906395	0.193591735	0.223821919	0.434058438
W06000009	2009	0.441511552	0.53939811	0.565408064	0.409484222	0.164879703	0.192724288	0.567726269	1.708687724	0.265825812	0.411252934	0.224386338	0.283143622	0.332234736	0.71075888	0.702801699	0.228215509	0.785027425	0.506356065	0.08537179	0.833312726	0.876643406	0.891652255	1.168003834	0.403311149	0.454935206	0.338329579	0.12597319	0.784863493	0.069338252	2.068973113	0.038743617	0.238974612	0.204799953	0.859676373	0.578635957	0.20573681	1.467694639	0.473771554	0.272130323	0.083570151	0.30304788	0.112170089	0.317620494	0.593156541	0.306124709	0.198941827	0.233971451	0.444020962
W06000010	2009	0.431147009	0.533920797	0.557859552	0.411944917	0.159629771	0.1890059	0.559057479	1.76795519	0.268661882	0.411716266	0.224932811	0.27831907	0.323670428	0.7249613	0.700306364	0.228493333	0.78056344	0.505496294	0.085210958	0.832483287	0.879127805	0.888372481	1.172722741	0.401205022	0.452774276	0.337583387	0.124506569	0.777869559	0.068555693	2.077192096	0.039432002	0.236813979	0.202376924	0.850658997	0.58794646	0.204667862	1.397625361	0.471653138	0.271844476	0.088791139	0.30162782	0.113191275	0.314081236	0.590370876	0.308807493	0.195353504	0.228006334	0.443018552
W06000011	2009	0.404982578	0.513221795	0.529135017	0.388605187	0.150692145	0.173506962	0.536687434	1.70857252	0.256729918	0.386586118	0.210300593	0.257321617	0.310863176	0.711143113	0.664517835	0.215779262	0.737456642	0.493987691	0.085324605	0.783375297	0.847678713	0.823573595	1.114059528	0.370873282	0.426345572	0.319557921	0.121651548	0.72333001	0.068418611	1.952046031	0.037661175	0.227585238	0.190764045	0.823219246	0.564299781	0.19616248	1.295764244	0.434927573	0.260888373	0.086718772	0.27778896	0.105199765	0.298357552	0.560681582	0.301960918	0.18662811	0.215684655	0.428917223
W06000012	2009	0.418460355	0.532263231	0.548071508	0.414621278	0.153679044	0.182540145	0.547642539	1.811413434	0.270695254	0.405183511	0.224317827	0.27184454	0.315144589	0.742047451	0.691266987	0.224725783	0.776058893	0.512055156	0.085984771	0.821965294	0.882724513	0.873949109	1.171840826	0.393926103	0.44525028	0.341175629	0.122591613	0.770524035	0.068049437	2.078029326	0.039505745	0.234125661	0.198778231	0.849384166	0.598494566	0.201363819	1.339144987	0.464072374	0.271056662	0.094653564	0.299300645	0.112370758	0.303966442	0.591092198	0.315991841	0.190377614	0.219288985	0.441645556
W06000013	2009	0.418142795	0.535197323	0.550052514	0.412210167	0.151542879	0.180836809	0.547925802	1.774550304	0.269877952	0.404666424	0.220866824	0.270041705	0.316177838	0.742165206	0.69464342	0.224129287	0.77597598	0.519587552	0.08656482	0.825724565	0.882020958	0.870365563	1.167651444	0.391922463	0.443986153	0.339246187	0.12276699	0.766857336	0.067463137	2.068603117	0.040013718	0.232826144	0.197376493	0.847526943	0.599600446	0.199771274	1.367294605	0.460436707	0.269491924	0.09389439	0.296115112	0.110401295	0.302129266	0.57841644	0.318256856	0.189842258	0.222676842	0.447328521
W06000014	2009	0.436743639	0.547288311	0.559495778	0.414095437	0.160814948	0.183368666	0.567395747	1.688938551	0.267014909	0.410121999	0.219602958	0.274438718	0.330982849	0.725162302	0.700628091	0.223720068	0.781749504	0.526950948	0.088653503	0.825818842	0.886061075	0.864290572	1.156788007	0.39004953	0.449145604	0.340711339	0.128345188	0.774118172	0.069942838	2.059718137	0.039904051	0.239695777	0.199383425	0.869307297	0.587072621	0.203195027	1.487659115	0.458406617	0.270899238	0.091835773	0.287889133	0.107062424	0.308578627	0.579550843	0.318514544	0.196436865	0.231451904	0.457013788
W06000015	2009	0.3826666	0.50147982	0.509877833	0.365997146	0.148397894	0.156153978	0.527650715	1.638127566	0.239208014	0.364675736	0.186636403	0.227736239	0.314729536	0.687502683	0.627161054	0.200787199	0.688433286	0.479137162	0.08668817	0.720003753	0.808519556	0.731732207	1.02661566	0.329844195	0.389924751	0.296146285	0.120820377	0.656927254	0.071821945	1.757492582	0.03591013	0.218408797	0.173169318	0.804904822	0.523227075	0.186265126	1.240468467	0.37868264	0.246152823	0.096175153	0.247591528	0.092908057	0.284158376	0.499357264	0.289778684	0.179179613	0.211315871	0.427262498
W06000016	2009	0.404461328	0.521594109	0.531979387	0.403499279	0.147338629	0.174638969	0.530986963	1.826529084	0.264859008	0.398352832	0.214841258	0.262970116	0.309040803	0.736875128	0.675284736	0.22088382	0.758185869	0.503334503	0.084647366	0.801582197	0.864446136	0.851481592	1.145924475	0.382496627	0.432271541	0.330412343	0.119457792	0.744072586	0.065629959	2.026612702	0.039160039	0.227528454	0.190855299	0.826073114	0.592748282	0.194333361	1.306678892	0.448125182	0.261987212	0.094613358	0.28919706	0.107624497	0.289909125	0.564185485	0.314519387	0.18408101	0.211572405	0.434110148
W06000018	2009	0.406321963	0.52636148	0.534777457	0.412298626	0.148218374	0.175595588	0.5321427	1.833910736	0.267066677	0.401906844	0.216577415	0.265342523	0.309052755	0.744058674	0.684517014	0.223622504	0.765476354	0.509719901	0.084225862	0.811086053	0.870367436	0.854343104	1.152259117	0.386220201	0.435936019	0.336587697	0.118002819	0.751523825	0.06531576	2.043864218	0.039955298	0.229268121	0.190843163	0.833416115	0.595658945	0.194951634	1.315884314	0.452990485	0.26224447	0.10045509	0.292478125	0.107686452	0.285653325	0.558857132	0.316425344	0.183012305	0.212740869	0.438803128
W06000019	2009	0.394767098	0.516033844	0.52754268	0.407338935	0.14291409	0.176330577	0.519936665	1.941969887	0.269575247	0.399469859	0.219447472	0.262093731	0.294035526	0.750381418	0.674355871	0.222210532	0.758376793	0.500301884	0.082864067	0.810958855	0.869807326	0.867551782	1.164551404	0.390203471	0.436038133	0.335149014	0.11356507	0.749586243	0.063504337	2.068211435	0.039335302	0.22338105	0.192711791	0.816779386	0.605199284	0.193898666	1.223946014	0.456269584	0.265184882	0.097764289	0.297826653	0.112328975	0.282377596	0.572437039	0.313699076	0.179772177	0.208455516	0.429872711
W06000020	2009	0.405941154	0.521715301	0.531707108	0.414261882	0.146959685	0.176427224	0.53010092	1.820496165	0.267955046	0.400671132	0.218520349	0.264128964	0.305298798	0.742062842	0.677738194	0.221693857	0.760361661	0.504368614	0.084468494	0.807940559	0.869836289	0.861363136	1.156387582	0.386214157	0.437173391	0.333868033	0.117177249	0.747610934	0.064948374	2.054338325	0.039418678	0.227981432	0.192913538	0.827200214	0.597539875	0.196070949	1.293672408	0.451526697	0.263215645	0.098062951	0.293182385	0.108357688	0.292458855	0.569393248	0.312680367	0.18457414	0.211408868	0.431565239
W06000021	2009	0.454076099	0.555654504	0.574143215	0.414287335	0.166029804	0.192567311	0.584354274	1.650722223	0.270281062	0.418833155	0.225037686	0.288104772	0.337264835	0.715898265	0.716911982	0.228148879	0.801150425	0.526390189	0.09059458	0.842913561	0.896595928	0.901608435	1.17726097	0.402786536	0.462121803	0.34671322	0.133516598	0.795114468	0.070921717	2.099068111	0.039946444	0.244135094	0.207584694	0.874637067	0.587382552	0.207043154	1.568896996	0.481565644	0.276225602	0.080362006	0.301639818	0.111041143	0.326829303	0.617954751	0.317143265	0.201957226	0.238804354	0.459342655
W06000022	2009	0.393433664	0.508734493	0.519850696	0.387899156	0.145999896	0.168611299	0.523988965	1.697755411	0.256673585	0.387174267	0.205804597	0.24955288	0.304787456	0.720987347	0.657176238	0.215328808	0.727519923	0.488236567	0.084253705	0.776145994	0.843643194	0.809311431	1.103915362	0.364737699	0.418312677	0.317079423	0.118370968	0.707968779	0.067424338	1.930587679	0.03867633	0.224950688	0.183837004	0.814024091	0.570064485	0.193106051	1.250249321	0.421513644	0.256021522	0.099754727	0.273357984	0.102181802	0.284793255	0.537298526	0.303876369	0.181404038	0.209621276	0.430202649
W06000023	2009	0.448475887	0.542859349	0.572089479	0.41276082	0.16782023	0.196512364	0.576997435	1.705223081	0.268384157	0.416703691	0.228375123	0.290385759	0.336280833	0.713289216	0.71146394	0.231481642	0.794404291	0.509361488	0.086668623	0.845835219	0.886672446	0.908395283	1.182307588	0.409355276	0.464401768	0.341522922	0.129204928	0.796640532	0.069892715	2.096404437	0.039376903	0.243577186	0.209384435	0.872536784	0.580513263	0.209822734	1.482568084	0.485807314	0.27683228	0.078692367	0.308045378	0.1147154	0.328693083	0.611222342	0.307536295	0.202468265	0.236120319	0.446101326
W06000024	2009	0.399401655	0.517811866	0.529312274	0.406980224	0.145095687	0.173610526	0.524342668	1.845535156	0.266706585	0.395447966	0.214855801	0.25908078	0.302061275	0.743711033	0.679589707	0.221346202	0.75573023	0.503219118	0.083350882	0.800721773	0.862905359	0.847491413	1.147053116	0.382479444	0.43207253	0.332659431	0.116531143	0.738115499	0.06508694	2.025988909	0.0392693	0.224019025	0.189398749	0.820169415	0.594781809	0.192949545	1.255953524	0.445326549	0.261467629	0.099083653	0.289886065	0.108081644	0.283485052	0.552562088	0.313505285	0.180840555	0.210306807	0.433127199
[truncated: 47 more columns]
